# Supplementary material for: Geometric uncertainty in intracranial aneurysm rupture status discrimination: a two-site retrospective study
Source: HighWire-hosted journal article supplement (doi:10.1136/bmjopen-2022-063051), 2022-11-01
Supplement: bmjopen-2022-063051supp001_data_supplement.xlsx [file bmjopen-2022-063051supp001_data_supplement.xlsx]

## Sheet: geometric parameters
parameter name	patient and aneurysm ID	site supplying data	site processing data	IA location	IA anatomical region	rupture status	height	maximum dimension	maximum height	maximum diameter	bulge height	surface area	convex hull surface area	minimal bounding sphere surface area	closed aneurysm surface area	volume	convex hull volume	minimal bounding sphere volume	minimum neck diameter	maximum neck diameter	neck perimeter	equivalent neck diameter	neck area	elliptical neck area	aspect ratio using maximum neck diameter	aspect ratio using equivalent neck diameter	bottleneck factor	bulge location	nonspericity index (uses closed aneurysm surface area)	aneurysm volume to minimal bounding sphere volume	aneurysm surface area to minimal bounding sphere surface area (uses closed aneurysm surface area)	undulation index	ellipticity index	mean of mean curvature	mean of magnitude of mean curvature	standard deviation of mean curvature	high mean curvature	L2-norm of mean curvature	mean of Gaussian curvature	mean of magnitude of Gaussian curvature	standard deviation of Gaussian curvature	high Gaussian curvature	L2-norm of Gaussian curvature
abbreviation	-	-	-	-	-	-	H	L_max	H_max	D_max	H_b	A	A_CH	A_MBS	A_closed	V	V_CH	V_MBS	D_neck,min	D_neck,max	P_neck	D_neck,equiv	A_neck	A_neck,elliptical	AR	eAR	BF	BL	NSI	AVSV	AASA	UI	EI	MAA	absMAA	MSD	HMC	MLN	GAA	absGAA	GSD	HGC	GLN
unit	-	-	-	-	-	1=ruptured, 0=unruptured	mm	mm	mm	mm	mm	cm^2	cm^2	cm^2	cm^2	ml	ml	ml	mm	mm	mm	mm	cm^2	cm^2	-	-	-	-	-	-	-	-	-	mm^-1	mm^-1	mm^-1	%	-	mm^-2	mm^-2	mm^-2	%	-
	1	Berlin	Berlin	AComA	anterior	1	5.74756	6.62875	5.79048	5.71281	0.877174	0.887199	1.01829	1.49463	1.0029	0.0833355	0.0905178	0.17182	2.90265	3.88484	13.0864	3.53653	0.115701	0.088564	1.47948	1.6252	1.47054	0.152617	0.269809	0.485015	0.671002	0.079347	0.240096	0.31793	0.36965	0.302995	27.4831	0.329191	0.0688237	0.227234	0.376023	170.27	2.69886
	2	Berlin	Berlin	PComA	posterior	0	8.26094	11.8884	8.54383	10.9308	3.00339	2.39126	2.72244	4.65174	2.53674	0.268604	0.371701	0.943401	2.99193	5.43394	17.0291	3.41721	0.14548	0.12769	1.52025	2.41745	2.01158	0.363566	0.370098	0.284719	0.545332	0.277364	0.271139	0.254318	0.328145	0.306967	99.6497	0.490541	0.0337263	0.178622	0.30809	561.209	5.89769
	3	Berlin	Berlin	PICA	posterior	1	6.023	7.30581	6.13333	4.86151	0.31294	0.742138	0.913859	1.67686	0.887689	0.063573	0.0706928	0.204182	3.27585	4.86155	14.8312	3.92554	0.145551	0.12508	1.23891	1.53431	0.999991	0.0519575	0.31125	0.311355	0.529377	0.100715	0.281911	0.321963	0.382179	0.329755	39.6078	0.315944	0.0483026	0.219729	0.383484	193.206	2.28266
	4	Berlin	Berlin	AComA	anterior	1	5.69768	7.86724	6.54414	7.16523	3.56728	1.01755	1.14591	1.97903	1.12231	0.0969221	0.104995	0.26179	2.41233	3.90329	13.3169	3.14667	0.10476	0.0739533	1.45971	1.8107	1.83569	0.626094	0.278378	0.370229	0.567101	0.0768891	0.25452	0.301759	0.342675	0.254548	35.9891	0.316901	0.0503793	0.191997	0.287229	202.369	2.3613
	5	Berlin	Berlin	ACA	anterior	0	5.66709	7.33638	6.31542	6.10446	1.92868	0.88823	1.02217	1.7488	1.0143	0.084788	0.0867738	0.217463	2.83486	4.49683	15.4707	3.25958	0.12607	0.100121	1.26024	1.7386	1.3575	0.34033	0.26965	0.389896	0.579996	0.0228838	0.264002	0.325108	0.337018	0.247264	25.7241	0.306335	0.0806218	0.152181	0.244293	111.783	1.81834
	6	Berlin	Berlin	MCA	MCA	0	2.84917	6.27532	4.48171	5.783	0.575349	0.693154	0.905797	1.26918	0.899536	0.0738042	0.0764234	0.134449	4.24278	5.25169	19.0396	4.33586	0.206382	0.175001	0.542524	0.657118	1.10117	0.201936	0.249225	0.548938	0.708754	0.0342723	0.236877	0.322331	0.34802	0.234205	10.6013	0.263974	0.0897864	0.154756	0.216536	56.3001	1.29301
	7	Berlin	Berlin	ICA	ICA	0	19.5753	23.8884	20.5085	23.4753	9.62107	12.4953	13.2427	18.3708	13.2392	4.10641	4.29947	7.404	7.1016	11.3742	37.99	7.83259	0.7439	0.634407	1.72102	2.49921	2.0639	0.49149	0.256546	0.55462	0.720665	0.0449033	0.233626	0.0904024	0.139559	0.155443	68.7402	0.505824	0.0061023	0.0299154	0.0722041	337.335	7.20517
	8	Berlin	Berlin	MCA	MCA	0	4.19948	6.59687	4.53419	6.40348	1.47338	0.745809	0.934331	1.42234	0.924166	0.0761991	0.0796238	0.159508	2.93747	5.73214	18.9399	3.7668	0.178357	0.132245	0.732619	1.11487	1.11712	0.350849	0.25351	0.477715	0.649748	0.0430112	0.23967	0.324217	0.37903	0.315228	27.518	0.310767	0.080472	0.199419	0.305629	125.715	1.87572
	9	Berlin	Berlin	MCA	MCA	0	3.79549	5.83738	3.93937	5.1834	0.0703493	0.568103	0.802333	1.09902	0.794515	0.0601385	0.0624639	0.108339	3.70014	5.16289	19.5851	4.62416	0.226412	0.150038	0.735148	0.820796	1.00397	0.018535	0.25845	0.555097	0.722929	0.0372286	0.246866	0.307521	0.3245	0.236681	-4.03494	0.232754	0.0757023	0.158787	0.255678	38.8707	1.20547
	10	Berlin	Berlin	AComA	anterior	1	5.05064	6.51767	5.44865	5.8606	2.39774	0.712569	0.82161	1.33778	0.808854	0.0592844	0.0621362	0.145496	3.13496	3.55465	11.3603	3.39024	0.096285	0.0875222	1.42085	1.48976	1.64871	0.47474	0.278509	0.407465	0.604625	0.0458967	0.267111	0.353664	0.375809	0.33062	22.6181	0.325215	0.0919365	0.202883	0.411962	115.984	2.39347
	11	Berlin	Berlin	MCA	MCA	0	6.7891	8.49539	6.90173	7.44126	3.39071	1.53974	1.81314	2.34083	1.80251	0.215063	0.219028	0.336767	4.06051	6.6866	22.3024	4.71285	0.26277	0.213243	1.01533	1.44055	1.11286	0.499435	0.235624	0.638611	0.770029	0.0181025	0.230794	0.238895	0.248303	0.177531	7.16738	0.293902	0.0474999	0.0829266	0.136263	54.4736	1.76815
	12	Berlin	Berlin	ICA	ICA	1	7.60952	11.2461	9.79725	10.2003	3.15294	1.75505	1.89902	3.98141	1.85324	0.194673	0.210827	0.747015	2.89594	4.02172	12.3951	3.16866	0.09819	0.0914728	1.89211	2.40149	2.5363	0.414342	0.304314	0.260602	0.465473	0.0766198	0.28403	0.258944	0.29436	0.242174	65.6887	0.373768	0.0411055	0.129584	0.235172	310.56	3.33426
	13	Berlin	Berlin	MCA	MCA	0	8.1571	11.3942	8.61127	10.972	4.42942	2.21806	2.47502	4.07869	2.45891	0.333579	0.342879	0.774561	4.59124	6.20665	19.4201	4.96083	0.24085	0.223809	1.31425	1.6443	1.76777	0.543014	0.249188	0.430669	0.602867	0.0271216	0.240276	0.21637	0.232259	0.169896	32.3208	0.32604	0.0419847	0.0712471	0.101682	131.248	1.94175
	14	Berlin	Berlin	AComA	anterior	1	2.54192	7.30768	4.47922	7.29247	0.286614	0.574072	0.84378	1.68369	0.826008	0.0586235	0.063668	0.205432	3.91064	6.35045	21.0361	4.79055	0.251936	0.195048	0.400274	0.530611	1.14834	0.112755	0.298753	0.285367	0.490593	0.0792317	0.274686	0.356152	0.38037	0.248995	39.2299	0.262014	0.102009	0.203075	0.260106	172.089	1.27637
	15	Berlin	Berlin	PComA	posterior	1	3.19596	4.67159	3.41126	4.15719	0.0325157	0.354238	0.488901	0.728701	0.48584	0.0269111	0.0280175	0.0584922	3.52489	4.15725	13.2669	3.96782	0.131602	0.115091	0.768767	0.80547	0.999985	0.010174	0.290528	0.460081	0.666721	0.0394894	0.275776	0.400885	0.403823	0.211218	-2.75639	0.214613	0.132118	0.193491	0.22917	12.2019	0.745682
	16A	Berlin	Berlin	ICA	ICA	1	9.58744	13.6267	11.8343	11.0814	4.34141	3.15285	3.47957	5.83887	3.38118	0.525556	0.56677	1.32668	4.21648	6.40846	19.8354	4.60451	0.22833	0.212223	1.49606	2.08219	1.72918	0.452822	0.260704	0.396143	0.579082	0.0727175	0.244526	0.184819	0.215195	0.197137	46.6868	0.381826	0.0237567	0.0821465	0.157775	281.687	4.00315
	16B	Berlin	Berlin	ACA	anterior	0	1.87943	2.87483	1.89883	2.87463	0.0573554	0.126409	0.180062	0.276065	0.178489	0.00601626	0.00624763	0.0136393	1.92001	2.87483	8.84113	2.35626	0.05208	0.0433516	0.653751	0.797631	0.999928	0.0305175	0.288655	0.441098	0.646546	0.0370329	0.276905	0.666148	0.671405	0.414286	-0.485735	0.221949	0.360777	0.562543	0.758263	23.5826	0.844697
	17A	Berlin	Berlin	ICA	ICA	0	12.2615	14.3026	12.5907	12.333	6.47282	3.9209	4.28536	6.5912	4.24196	0.729561	0.76537	1.59118	5.7784	6.67605	22.6601	5.66741	0.32106	0.302982	1.83663	2.1635	1.84734	0.527899	0.266699	0.458502	0.643579	0.0467859	0.250564	0.163224	0.199369	0.192414	44.3894	0.397589	0.0201193	0.0633642	0.126892	232.352	4.00869
	17B	Berlin	Berlin	ICA	ICA	0	2.79149	3.76328	2.87388	3.38194	1.30171	0.280599	0.341789	0.445069	0.340708	0.0175465	0.0178472	0.02792	2.37048	2.8859	9.06148	2.65339	0.060109	0.0537289	0.967286	1.05205	1.17188	0.466314	0.239291	0.628456	0.765517	0.0168505	0.233057	0.524256	0.542703	0.286018	2.13427	0.251741	0.241363	0.362685	0.399839	28.454	1.04287
	17C	Berlin	Berlin	AComA	anterior	0	4.53042	5.66937	4.7249	4.47341	2.10381	0.553488	0.648091	1.0154	0.643036	0.0436738	0.0449671	0.0962119	2.78057	3.68443	11.4813	3.11978	0.089548	0.0804625	1.22961	1.45216	1.21414	0.464373	0.259736	0.453934	0.633284	0.0287599	0.251081	0.38867	0.398792	0.189533	13.3599	0.256006	0.120464	0.190727	0.207243	54.1132	1.05581
	18	Berlin	Berlin	MCA	MCA	1	5.59682	7.90956	6.28899	6.67335	3.76993	1.02357	1.17491	1.96958	1.15096	0.101425	0.109585	0.259916	3.37365	4.35958	13.7707	3.70033	0.12739	0.115514	1.2838	1.51252	1.53073	0.673584	0.274711	0.390223	0.584369	0.0744626	0.251881	0.291779	0.307014	0.212045	21.546	0.290392	0.0531853	0.152476	0.204436	138.982	1.72063
	19	Berlin	Berlin	AComA	anterior	1	5.17712	6.43871	5.23298	5.82995	1.47428	0.814759	0.990793	1.3275	0.978298	0.0808458	0.0854642	0.143822	4.12869	4.93884	15.3451	4.26296	0.163539	0.16015	1.04824	1.21444	1.18043	0.284768	0.26643	0.562124	0.736948	0.0540391	0.248353	0.315423	0.33985	0.238938	10.4587	0.284234	0.0813568	0.165486	0.226372	74.8182	1.55963
	20	Berlin	Berlin	PComA	posterior	1	10.569	12.6325	11.229	10.8592	3.42539	3.00113	3.30654	5.02944	3.29298	0.523493	0.535095	1.06061	5.28251	6.85936	21.2474	5.49432	0.29185	0.284586	1.54081	1.92362	1.58312	0.324098	0.24289	0.493579	0.65474	0.0216821	0.234896	0.17871	0.202784	0.15834	28.2888	0.329157	0.0277969	0.0555182	0.0955634	122.201	2.37687
	21	Berlin	Berlin	ICA	ICA	0	4.96633	8.45314	6.01953	7.81971	1.93637	0.986656	1.24356	2.24512	1.23578	0.112022	0.115913	0.316324	4.39919	6.78169	20.0025	4.98186	0.249124	0.234315	0.732315	0.996884	1.15306	0.389899	0.278225	0.354137	0.55043	0.0335675	0.266227	0.283363	0.314967	0.227166	33.131	0.287074	0.0729195	0.130758	0.186254	133.613	1.57047
	22	Berlin	Berlin	ICA	ICA	0	7.90818	9.5214	8.03499	9.2286	3.50397	2.12461	2.43868	2.87806	2.43271	0.343533	0.348962	0.459116	5.6924	6.34489	21.8426	5.64218	0.3081	0.283667	1.24639	1.40162	1.45449	0.443081	0.226081	0.748248	0.845262	0.0155591	0.219862	0.200454	0.216205	0.11941	3.46896	0.270639	0.0358937	0.0558751	0.0644614	27.9698	1.24742
	23	Berlin	Berlin	MCA	MCA	1	4.59806	8.52959	5.73256	7.29381	1.94931	1.04969	1.42048	2.32793	1.39704	0.13238	0.143661	0.333986	5.05075	7.40042	24.2481	5.72995	0.34735	0.293564	0.621324	0.802462	0.985594	0.423941	0.286357	0.396365	0.600122	0.0785222	0.258806	0.23894	0.270503	0.230777	16.4265	0.270837	0.0382993	0.129808	0.217121	140.469	1.84165
	24	Berlin	Berlin	ICA	ICA	0	2.90613	4.79267	3.00538	4.7407	0.0751127	0.310283	0.478901	0.796707	0.469594	0.025214	0.0273979	0.0668685	3.55419	4.75236	15.3806	4.14315	0.159311	0.13266	0.611512	0.701429	0.997547	0.0258463	0.297178	0.377068	0.589419	0.0797129	0.271594	0.357356	0.381857	0.263529	-3.85107	0.196819	0.0960713	0.245687	0.28179	55.7654	0.735106
	25	Berlin	Berlin	BA	posterior	0	8.47347	14.6674	10.2799	13.8476	1.2932	4.12175	5.43968	6.78207	5.41886	1.12897	1.14791	1.6608	6.10266	13.9448	53.5253	9.69343	1.29711	0.668378	0.607643	0.874146	0.993028	0.152617	0.232011	0.679776	0.798998	0.0164973	0.226419	0.132292	0.139716	0.0883929	2.64127	0.257048	0.0156516	0.0253472	0.0331648	36.7987	1.20285
	26	Berlin	Berlin	MCA	MCA	1	4.20958	7.67745	4.98969	6.52571	2.19022	0.873162	1.09373	1.89005	1.06028	0.0853006	0.096104	0.244335	3.2408	5.42131	18.0572	4.145	0.187118	0.13799	0.776488	1.01558	1.20372	0.520294	0.29851	0.349114	0.560979	0.112413	0.263694	0.320704	0.386872	0.37151	50.0373	0.364946	0.0766328	0.284404	0.468193	327.761	3.29647
	27	Berlin	Berlin	AComA	anterior	1	4.59679	8.49954	5.69111	8.41182	2.0831	1.08761	1.3254	2.26973	1.30957	0.123945	0.130912	0.321541	4.74248	5.93731	19.0158	4.66895	0.22196	0.221149	0.77422	0.984545	1.41677	0.453164	0.271387	0.385471	0.576971	0.0532236	0.253356	0.302916	0.333227	0.246222	41.6192	0.323963	0.0850413	0.153813	0.208734	177.817	1.95075
	28	Berlin	Berlin	MCA	MCA	1	5.48044	10.4198	6.54824	10.2459	2.93787	1.20416	1.48038	3.41093	1.37663	0.111637	0.140308	0.592355	3.14807	5.2327	16.748	4.11917	0.17247	0.129378	1.04735	1.33047	1.95806	0.536065	0.35356	0.188462	0.403594	0.204344	0.299908	0.317237	0.353583	0.270071	84.2138	0.363814	0.0548983	0.216583	0.302954	487.876	2.95031
	29	Berlin	Berlin	ICA	ICA	0	12.7797	15.7543	13.7115	11.4014	3.70419	3.51597	3.93732	7.80248	3.86754	0.564197	0.640392	2.04938	6.06731	6.81152	24.4966	5.74073	0.35157	0.324586	1.87619	2.22615	1.67384	0.289849	0.322369	0.275301	0.495681	0.118982	0.275724	0.176408	0.237261	0.244433	86.955	0.449797	0.0188798	0.0872824	0.200282	441.938	5.62857
	30A	Berlin	Berlin	ICA	ICA	0	4.07779	6.13728	4.50849	5.3427	2.0065	0.662602	0.820398	1.1836	0.816763	0.0632161	0.0647722	0.121083	3.92912	4.53724	15.4692	3.98628	0.154161	0.140016	0.898739	1.02296	1.17752	0.492056	0.254245	0.52209	0.690065	0.0240245	0.245414	0.336677	0.370959	0.234502	13.8475	0.265775	0.100395	0.161064	0.201095	51.7032	1.18514
	30B	Berlin	Berlin	AComA	anterior	0	3.13509	6.67747	3.85376	6.46017	1.20075	0.590131	0.769251	1.40158	0.757191	0.0536687	0.0574482	0.156027	2.964	5.04391	16.7816	3.98198	0.16706	0.117418	0.621559	0.787318	1.28079	0.383005	0.278755	0.34397	0.540241	0.0657899	0.257111	0.354281	0.438551	0.398939	46.4617	0.326162	0.0871403	0.305585	0.492478	240.832	2.34865
	30C	Berlin	Berlin	AComA	anterior	1	5.08533	6.75076	5.48136	4.73631	1.32965	0.576528	0.716306	1.43171	0.69598	0.0445688	0.0494516	0.161086	2.85854	4.07261	13.5666	3.52195	0.119452	0.091434	1.24867	1.4439	1.16297	0.261467	0.306737	0.276677	0.486117	0.0987403	0.278069	0.370832	0.40703	0.281124	37.3881	0.281174	0.0756564	0.230958	0.343251	163.135	1.61259
	30D	Berlin	Berlin	MCA	MCA	0	2.71519	3.66099	2.75977	3.24566	1.17212	0.231721	0.302658	0.424195	0.300642	0.0140048	0.0145735	0.0259789	2.33829	3.0935	9.10304	3.02848	0.068921	0.0568118	0.877707	0.896551	1.04918	0.43169	0.258221	0.539081	0.708736	0.0390281	0.243344	0.498805	0.569984	0.383783	4.72257	0.241087	0.183881	0.474639	0.579776	60.2207	1.12158
	30E	Berlin	Berlin	PICA	posterior	1	4.9825	6.65467	5.16325	5.03355	1.72739	0.690538	0.832139	1.39134	0.82255	0.0623907	0.065147	0.154321	3.38834	4.39518	14.337	3.68312	0.132012	0.116964	1.13363	1.35279	1.14524	0.346691	0.265951	0.404293	0.591193	0.0423085	0.253194	0.324796	0.361725	0.272188	20.3622	0.280227	0.0806494	0.167354	0.274588	85.2938	1.57263
	31	Berlin	Berlin	MCA	MCA	0	4.54225	8.13545	5.83859	7.99324	1.42295	1.1863	1.43755	2.167	1.4167	0.141887	0.150183	0.299959	4.22087	5.87394	20.2425	4.55279	0.2304	0.194725	0.773289	0.997683	1.3608	0.31327	0.262959	0.473023	0.653762	0.0552402	0.245604	0.270975	0.308071	0.246464	27.9309	0.31748	0.0596272	0.143652	0.226175	147.719	2.20809
	32	Berlin	Berlin	ICA	ICA	0	9.47464	16.9855	10.7403	15.8452	2.21265	5.92631	6.88223	9.20916	6.86895	1.56372	1.61766	2.62787	7.4598	14.2523	45.1295	8.35498	0.94264	0.83503	0.66478	1.13401	1.11176	0.233534	0.247184	0.59505	0.745882	0.0333464	0.231454	0.127687	0.163745	0.147766	40.1756	0.378325	0.015371	0.0330966	0.0587135	142.546	2.86224
	33	Berlin	Berlin	AComA	anterior	1	6.21156	7.95017	6.71315	6.08044	1.98924	1.03023	1.24357	2.02152	1.22363	0.10808	0.118435	0.270265	3.38923	5.9195	16.9091	4.57504	0.1934	0.157571	1.04934	1.35771	1.02719	0.320247	0.288259	0.399905	0.605303	0.0874285	0.255627	0.284289	0.342626	0.31214	37.4215	0.341016	0.0481783	0.212862	0.351411	242.425	2.90794
	34	Berlin	Berlin	AComA	anterior	0	3.38345	5.21248	3.5631	5.00511	0.689067	0.482616	0.669428	0.895395	0.665479	0.0460175	0.0475189	0.0796702	4.1005	4.88806	16.8583	4.33882	0.182863	0.157421	0.692187	0.779809	1.02395	0.203658	0.259335	0.5776	0.743224	0.0315964	0.247775	0.33469	0.386836	0.268755	3.25925	0.237296	0.0975156	0.204184	0.253141	45.4879	1.04184
	35	Berlin	Berlin	ICA	ICA	1	11.6897	12.891	11.7766	8.9322	5.55777	2.58436	2.87544	5.25969	2.84431	0.398154	0.413184	1.13426	4.95498	5.83163	21.5323	4.82903	0.25995	0.226946	2.00454	2.42072	1.53168	0.47544	0.26965	0.351024	0.540775	0.0363777	0.259487	0.192942	0.225843	0.209492	46.1105	0.364345	0.0273682	0.0731336	0.13674	206.103	2.86791
	36	Berlin	Berlin	BA	posterior	0	20.748	24.9255	21.0896	22.7335	9.91534	14.6544	15.3209	19.6523	15.2794	5.42439	5.48896	8.19207	4.85625	13.2725	38.7442	6.45259	0.625	0.506223	1.56323	3.21545	1.71283	0.477895	0.224464	0.662151	0.777487	0.0117631	0.22044	0.0881137	0.095533	0.0678739	19.469	0.338823	0.00663639	0.0123083	0.0201203	92.4864	2.47068
	37	Berlin	Berlin	AComA	anterior	1	5.54325	8.94583	6.97719	8.07485	2.26821	1.29807	1.55549	2.5412	1.52718	0.157186	0.166318	0.380918	4.14609	5.86084	19.226	4.76667	0.22911	0.190848	0.945811	1.16292	1.37776	0.409184	0.267974	0.41265	0.600968	0.054905	0.253725	0.274189	0.289322	0.211977	30.1055	0.314222	0.0610941	0.121407	0.181992	145.513	1.98303
	38	Berlin	Berlin	AComA	anterior	0	8.39952	14.7857	10.7417	14.2064	1.63302	2.87489	3.21617	6.86806	3.13163	0.407131	0.471355	1.69249	4.25074	6.31148	19.4926	5.26845	0.25674	0.21071	1.33083	1.59431	2.25088	0.194418	0.326724	0.240552	0.45597	0.136253	0.277174	0.211804	0.280534	0.268556	107.395	0.461491	0.0296417	0.133457	0.249259	629.4	5.74265
	39	Berlin	Berlin	ICA	ICA	1	4.2903	6.71503	5.0848	5.9475	1.91305	0.71221	0.843408	1.41979	0.83893	0.0657587	0.0679159	0.159077	3.32963	4.54844	14.2059	3.56809	0.12672	0.118945	0.943247	1.20241	1.30759	0.445901	0.25461	0.413376	0.590885	0.0317636	0.242439	0.335758	0.393441	0.318512	32.2469	0.310804	0.0932175	0.194125	0.294394	119.328	1.75015
	40	Berlin	Berlin	PComA	posterior	1	13.786	15.8273	13.9574	14.0416	6.93713	5.48682	5.90592	7.99208	5.86972	1.24894	1.28371	2.12453	5.82803	7.79137	26.9721	5.67847	0.3829	0.356636	1.76939	2.42776	1.8022	0.503202	0.241625	0.587865	0.734442	0.0270889	0.232347	0.135283	0.164628	0.153175	31.2893	0.380936	0.0154543	0.0371677	0.0660153	136.383	2.96034
	41	Berlin	Berlin	AComA	anterior	1	4.30127	6.41941	4.551	6.13369	0.624245	0.61825	0.839242	1.31551	0.813295	0.0575214	0.0645543	0.141878	2.86867	6.2799	18.7871	4.15275	0.195045	0.141489	0.684925	1.03576	0.976717	0.145131	0.296746	0.405429	0.618236	0.108947	0.264012	0.331399	0.350479	0.246676	13.3976	0.258497	0.0703844	0.202724	0.269437	112.222	1.37008
	42	Berlin	Berlin	PComA	posterior	0	5.89061	8.0621	6.21662	6.76823	2.45528	1.1259	1.36782	2.04197	1.36526	0.136808	0.139829	0.274377	5.09914	5.72177	19.7421	4.84974	0.23936	0.229149	1.02951	1.21462	1.18289	0.416812	0.253551	0.498615	0.6686	0.0216003	0.244022	0.258424	0.286982	0.207635	15.6841	0.279917	0.0516303	0.102429	0.226098	66.4411	2.07789
	43	Berlin	Berlin	ICA	ICA	0	6.87196	17.1876	10.6583	16.2382	2.25	3.2358	4.44452	9.42513	4.43003	0.696324	0.72322	2.72085	9.41055	15.3278	45.2623	10.5539	1.19423	1.13288	0.448333	0.651132	1.05939	0.327418	0.319322	0.255921	0.470023	0.0371889	0.304181	0.154223	0.182111	0.174732	57.7159	0.333615	0.0218957	0.042499	0.0806113	218.754	2.15093
	44	Berlin	Berlin	PICA	posterior	1	4.21292	7.30333	4.99624	6.30067	1.4697	0.688266	0.924651	1.67568	0.909703	0.0718525	0.0757814	0.203968	3.92149	5.38979	19.3472	4.57817	0.221437	0.166002	0.781648	0.920218	1.169	0.348855	0.270763	0.352274	0.542885	0.0518455	0.256631	0.345204	0.356208	0.233518	30.0753	0.275146	0.0960815	0.1981	0.246679	164.159	1.44994
	45A	Berlin	Berlin	ICA	ICA	0	2.4137	4.60502	2.69218	4.60297	0.0367264	0.296394	0.465989	0.713411	0.461738	0.0234878	0.0247245	0.0566608	4.0718	4.60502	15.9237	4.15341	0.165344	0.147268	0.524145	0.581136	0.999556	0.0152158	0.318226	0.414534	0.647226	0.0500198	0.300935	0.367754	0.387943	0.259404	-7.56569	0.194973	0.122422	0.194756	0.27732	10.5657	0.714996
	45B	Berlin	Berlin	ICA	ICA	1	3.50127	4.6046	3.61872	3.56409	1.96286	0.355214	0.43773	0.677117	0.429818	0.0229086	0.0245942	0.0523925	2.54427	3.49751	10.5091	2.83959	0.074604	0.0698895	1.00107	1.23302	1.01904	0.560613	0.279686	0.43725	0.634777	0.0685348	0.258424	0.43486	0.459946	0.29989	6.76625	0.250534	0.122335	0.314652	0.389938	69.5447	1.15521
	45C	Berlin	Berlin	ICA	ICA	0	2.29663	4.65304	2.59864	4.53679	0.353538	0.30251	0.480049	0.698096	0.47475	0.0249891	0.0267975	0.0548462	3.97308	4.53741	15.8217	4.35454	0.17224	0.141588	0.506155	0.527412	0.999863	0.153938	0.30895	0.455622	0.680064	0.0674835	0.283992	0.342597	0.407435	0.329073	-3.96917	0.207917	0.118497	0.246264	0.301529	36.8063	0.779912
	46	Berlin	Berlin	BA	posterior	0	11.1749	13.3263	11.6289	11.3416	5.79944	3.5456	3.8158	5.59582	3.79994	0.657674	0.670637	1.24471	5.06737	6.05986	20.2352	5.02767	0.25434	0.241176	1.84409	2.22268	1.8716	0.518971	0.236097	0.528373	0.679067	0.0193289	0.229309	0.168733	0.203005	0.182386	35.4674	0.372309	0.022743	0.0627704	0.105215	179.517	3.0372
	47	Berlin	Berlin	ICA	ICA	0	4.63644	7.1049	4.94701	6.0188	0.113246	0.67825	0.890933	1.58609	0.881715	0.0605763	0.0672645	0.18783	4.03911	6.01948	18.1965	4.47262	0.203465	0.190956	0.770239	1.03663	0.999886	0.0244252	0.328549	0.322507	0.555906	0.0994304	0.287443	0.313288	0.418646	0.407316	48.7323	0.33677	0.0782595	0.257239	0.381496	224.679	2.10194
	48	Berlin	Berlin	MCA	MCA	0	2.2036	4.77723	2.88762	4.51579	0.482254	0.282087	0.438721	0.726743	0.43321	0.023218	0.0243605	0.0582566	3.34869	4.13884	15.2208	3.97149	0.151123	0.108854	0.53242	0.554855	1.09108	0.218849	0.278906	0.398546	0.596098	0.0469002	0.264793	0.412966	0.472872	0.3328	13.7179	0.224163	0.139285	0.308836	0.392601	78.6069	0.93512
	49	Berlin	Berlin	MCA	MCA	1	16.9856	18.3336	17.2193	14.4628	8.22563	5.63828	6.06429	10.5596	5.97819	1.23222	1.28442	3.22658	3.90376	8.4906	26.4535	5.13974	0.33991	0.260322	2.00052	3.30476	1.70339	0.48427	0.262044	0.381897	0.56614	0.0406382	0.25212	0.142339	0.161329	0.145972	47.887	0.38525	0.0154461	0.0433231	0.0807488	264.046	3.68873
	50	Berlin	Berlin	PComA	posterior	1	7.58763	11.5129	9.97416	11.0501	4.57973	2.24084	2.48144	4.24008	2.39642	0.285216	0.333726	0.820983	3.6984	5.09717	15.8078	3.9368	0.15558	0.148058	1.4886	1.92736	2.16789	0.603579	0.305998	0.347408	0.565183	0.145358	0.255787	0.231711	0.27845	0.231609	61.7444	0.390267	0.0348587	0.115425	0.192533	289.46	3.48907
	51	Berlin	Berlin	AComA	anterior	0	5.04739	6.87955	5.48937	6.06107	2.06839	0.829199	0.999446	1.49158	0.993314	0.0861608	0.0884755	0.171294	3.65186	5.02832	14.9433	4.39299	0.164115	0.14422	1.00379	1.14896	1.20539	0.409795	0.246192	0.503	0.66595	0.0261622	0.237459	0.313781	0.343151	0.232059	18.2233	0.282803	0.0821801	0.158494	0.232649	88.1257	1.62811
	52	Berlin	Berlin	ACA	anterior	1	2.77949	4.14876	2.83995	3.77814	0.926277	0.296673	0.384037	0.541358	0.382349	0.0209248	0.0213294	0.0374543	2.69465	3.18166	10.9762	3.12225	0.085676	0.0673357	0.873599	0.89022	1.18748	0.333254	0.237708	0.558676	0.706277	0.0189688	0.231306	0.493974	0.515903	0.267375	7.07939	0.243461	0.220991	0.329061	0.340089	41.7595	0.957522
	53	Berlin	Berlin	AChA	ICA	1	6.82983	11.2341	7.77852	10.6226	2.59981	2.12893	2.27887	3.96485	2.25406	0.281771	0.296328	0.742358	3.68227	4.03454	12.8784	3.88652	0.12513	0.116681	1.69284	1.75731	2.63291	0.380656	0.26812	0.379562	0.568511	0.0491238	0.251366	0.222832	0.275129	0.26077	54.5416	0.398269	0.038503	0.108462	0.207334	242.212	3.57261
	54	Berlin	Berlin	PComA	posterior	1	4.8569	6.53483	5.08497	5.12566	0.261506	0.50684	0.706265	1.40045	0.685016	0.0411469	0.047068	0.155838	3.95817	5.12582	15.5999	4.56863	0.178176	0.159349	0.947535	1.0631	0.999968	0.0538423	0.332172	0.264036	0.489141	0.125798	0.291527	0.372997	0.401881	0.31188	34.1609	0.275452	0.09607	0.248004	0.416931	176.386	1.72566
	55	Berlin	Berlin	AComA	anterior	0	3.32993	6.19481	3.88062	6.00577	0.615589	0.577345	0.840009	1.2103	0.828908	0.0610689	0.0648654	0.125202	3.92576	6.00929	20.1136	5.00284	0.251563	0.185284	0.55413	0.665607	0.999414	0.184866	0.281906	0.487763	0.68488	0.0585288	0.262324	0.301665	0.327317	0.268699	1.58036	0.244269	0.071203	0.17881	0.282548	72.2159	1.33871
	56	Berlin	Berlin	MCA	MCA	1	2.09231	4.28163	2.75946	3.84055	0.150501	0.215545	0.331128	0.589595	0.324571	0.0133076	0.0148177	0.0425701	3.04413	3.8408	13.0466	3.34267	0.109026	0.0918279	0.544758	0.625939	0.999936	0.0719309	0.335905	0.312604	0.550498	0.101914	0.300697	0.437239	0.523141	0.441193	13.3159	0.229486	0.14676	0.442697	0.626472	107.707	1.10365
	57A	Berlin	Berlin	ICA	ICA	0	2.83093	5.96796	3.70349	5.93785	1.42282	0.516925	0.67809	1.11893	0.667854	0.0426347	0.0475819	0.111295	3.74654	4.64641	14.8865	4.05545	0.150929	0.136722	0.609272	0.698057	1.27794	0.502598	0.298596	0.383079	0.596871	0.103971	0.256728	0.390689	0.491445	0.421745	46.6462	0.328923	0.120121	0.372183	0.523808	231.396	2.21065
	57B	Berlin	Berlin	ICA	ICA	0	4.2773	4.77317	4.30973	4.19985	2.36781	0.467405	0.513263	0.771282	0.506044	0.0305365	0.0324571	0.0636933	1.74278	2.21169	6.68469	2.31209	0.038639	0.0302731	1.93395	1.84997	1.89893	0.553575	0.258977	0.479429	0.656107	0.059176	0.239076	0.431609	0.484038	0.309285	19.9172	0.28888	0.0795166	0.373444	0.597477	129.208	2.24191
	57C	Berlin	Berlin	ICA	ICA	0	4.9101	9.47891	6.68648	9.46896	2.11569	1.30458	1.44604	2.82286	1.42874	0.139097	0.14597	0.445973	3.49396	4.01319	13.9011	3.57267	0.12416	0.110128	1.22349	1.37435	2.35946	0.430884	0.278783	0.311895	0.506131	0.0470884	0.264125	0.285383	0.318338	0.235798	50.8791	0.336477	0.0606177	0.134838	0.239744	202.896	2.56723
	57D	Berlin	Berlin	AComA	anterior	1	2.56509	4.36238	2.73861	4.16527	0.1966	0.32623	0.446626	0.60008	0.445463	0.0248099	0.0255104	0.0437107	3.34033	4.16533	13.0067	3.66683	0.119233	0.109277	0.61582	0.699541	0.999985	0.0766445	0.267042	0.567593	0.74234	0.0274604	0.255254	0.443413	0.462561	0.262727	1.08072	0.23426	0.179509	0.26905	0.319429	28.4789	0.951228
	57E	Berlin	Berlin	MCA	MCA	0	6.61152	7.92754	6.83127	6.57819	2.90278	1.25577	1.46477	2.0264	1.45647	0.154216	0.158486	0.271245	3.37325	5.69649	18.6263	4.31002	0.2007	0.15092	1.16063	1.53399	1.15478	0.439049	0.242135	0.568549	0.718748	0.0269444	0.232581	0.261069	0.297959	0.228806	19.6503	0.309567	0.0574973	0.120334	0.208006	94.0462	2.15657
	57F	Berlin	Berlin	MCA	MCA	0	1.53595	2.79842	1.59282	2.79174	0.0135548	0.104952	0.170423	0.26589	0.167381	0.00522637	0.00570357	0.0128922	2.14938	2.79842	9.58575	2.60508	0.062429	0.0472407	0.548865	0.5896	0.997614	0.00882502	0.309387	0.40539	0.629512	0.0836682	0.28103	0.577507	0.601211	0.450379	-12.5474	0.188804	0.274077	0.589399	0.757461	24.71	0.672758
	57G	Berlin	Berlin	MCA	MCA	0	3.13864	6.32975	3.70273	6.0466	0.95415	0.580109	0.805803	1.25876	0.803216	0.0579718	0.059468	0.132796	4.54438	5.6661	18.5585	4.80872	0.223107	0.202232	0.553933	0.652697	1.06715	0.304001	0.284209	0.436546	0.638103	0.0251608	0.274282	0.355252	0.367659	0.231558	16.362	0.25702	0.119659	0.160581	0.208537	60.8519	1.1099
	58	Berlin	Berlin	PComA	posterior	1	3.99793	7.66797	6.5088	6.94286	1.24929	0.851517	1.05412	1.87336	0.998608	0.0699914	0.0877155	0.241105	3.23961	5.32687	15.3475	3.83361	0.147091	0.135536	0.750521	1.04286	1.30337	0.312485	0.347207	0.290295	0.533057	0.202063	0.281156	0.330184	0.384617	0.324313	48.5025	0.339858	0.0625057	0.255758	0.41309	281.276	2.83104
	59	Berlin	Berlin	ICA	ICA	0	4.87493	8.03757	5.76707	7.35713	1.7084	0.971525	1.15208	2.02955	1.14296	0.103007	0.106249	0.271878	3.98177	5.44535	15.9993	4.28607	0.171435	0.170291	0.895245	1.13739	1.35108	0.350446	0.262061	0.378872	0.563159	0.0305194	0.252618	0.321026	0.340153	0.253447	36.7004	0.320816	0.0850209	0.161965	0.289713	161.584	2.33427
	60A	Berlin	Berlin	MCA	MCA	0	8.54683	13.3843	9.88027	12.8637	3.8354	3.17406	3.75071	5.85448	3.69048	0.602765	0.635169	1.33201	5.65486	8.96769	30.9138	6.68207	0.51642	0.398284	0.953069	1.27907	1.43445	0.448751	0.257853	0.452524	0.630369	0.0510162	0.243828	0.17623	0.205229	0.196763	40.0808	0.374491	0.025179	0.0679833	0.150277	216.724	3.84869
	60B	Berlin	Berlin	MCA	MCA	0	3.17172	4.5827	3.36145	4.07658	0.0836495	0.363944	0.502323	0.704014	0.498227	0.0295059	0.0308758	0.0555451	3.24227	4.09037	14.3926	3.73201	0.134283	0.10416	0.77541	0.849869	0.996627	0.0263736	0.26438	0.531207	0.707695	0.0443663	0.247968	0.397378	0.436656	0.30236	3.35352	0.239715	0.136268	0.239914	0.327949	34.4086	1.02853
	61	Berlin	Berlin	AComA	anterior	1	10.8661	13.573	12.129	7.93963	6.39773	2.41051	2.61915	5.78767	2.56398	0.328151	0.35177	1.30927	4.02271	4.67353	15.3317	4.00399	0.15347	0.147657	2.32503	2.71382	1.69885	0.588778	0.287789	0.250637	0.443008	0.0671434	0.269725	0.220258	0.234405	0.159805	59.0795	0.33621	0.0339655	0.0818086	0.108064	276.784	2.17289
	62	Berlin	Berlin	ICA	ICA	1	4.54061	6.25292	4.78184	5.55963	2.59573	0.679386	0.785119	1.23177	0.781704	0.0604525	0.0615494	0.128549	3.02824	3.75639	12.271	3.33529	0.102318	0.0893412	1.20877	1.36138	1.48005	0.571671	0.243676	0.470267	0.634617	0.0178212	0.237884	0.366803	0.374229	0.215995	17.1648	0.279208	0.114215	0.17528	0.260696	71.8115	1.53876
	63	Berlin	Berlin	AComA	anterior	1	5.52362	6.77367	5.7376	4.77586	1.68729	0.751513	0.88187	1.46658	0.87623	0.0701442	0.0719478	0.167005	3.27295	4.16202	13.6262	3.6611	0.124717	0.106988	1.32715	1.50873	1.14749	0.305468	0.254952	0.420012	0.597466	0.0250678	0.247082	0.325807	0.355959	0.235408	21.604	0.27729	0.0728153	0.172821	0.277114	101.693	1.71349
	64	Berlin	Berlin	ICA	ICA	1	13.8387	19.5803	14.8622	19.1826	7.52442	7.5538	7.88946	12.0444	7.85083	1.91743	1.97114	3.93055	5.39978	6.93628	23.2212	5.11652	0.29703	0.294166	1.99512	2.70472	2.76555	0.543721	0.245421	0.487826	0.651822	0.0272491	0.235158	0.119077	0.162896	0.18364	59.4774	0.47869	0.0125589	0.0467407	0.137773	347.994	8.31607
	65	Berlin	Berlin	ICA	ICA	0	7.76831	10.7016	7.9769	8.92736	2.13941	2.01912	2.49535	3.60559	2.4806	0.325114	0.349016	0.643782	6.66763	7.54227	25.1027	7.35346	0.46148	0.394969	1.02997	1.05641	1.18364	0.275403	0.268398	0.505007	0.687986	0.068484	0.2375	0.166791	0.268103	0.333032	43.6104	0.421167	0.0213955	0.0929324	0.192628	166.645	3.11411
	66	Berlin	Berlin	AComA	anterior	1	3.65174	6.69792	4.62853	5.53984	0.488937	0.575839	0.764105	1.40971	0.757352	0.054506	0.0568168	0.157387	2.95368	5.75714	18.9134	3.83882	0.181513	0.133555	0.634297	0.951267	0.962255	0.133892	0.271428	0.346318	0.537239	0.0406706	0.257598	0.333636	0.398191	0.340711	33.3679	0.287961	0.0938422	0.203786	0.326843	128.61	1.55823
	67	Berlin	Berlin	MCA	MCA	1	4.03139	6.35403	4.69225	5.17719	1.31196	0.625935	0.794644	1.2892	0.775894	0.0534707	0.0595804	0.137644	3.37404	4.30299	14.2454	4.21073	0.149959	0.114028	0.936881	0.957409	1.20316	0.325435	0.297873	0.388472	0.60184	0.102546	0.263164	0.331036	0.414845	0.392878	32.8745	0.323449	0.0837362	0.228982	0.342386	134.917	1.7557
	68	Berlin	Berlin	AComA	anterior	1	2.67205	6.20415	3.20701	6.01608	0.114015	0.413395	0.705597	1.21501	0.694411	0.0444334	0.047886	0.125934	4.1144	6.20415	23.0087	4.88538	0.281016	0.200483	0.430688	0.546949	0.969686	0.0426696	0.306578	0.35283	0.571527	0.0721007	0.282663	0.258162	0.319588	0.293197	-0.625426	0.199879	0.037909	0.167721	0.269474	62.1656	0.895216
	69	Berlin	Berlin	ICA	ICA	0	11.7457	14.3757	13.009	10.9341	6.32542	2.63782	2.99407	6.4924	2.83046	0.343021	0.409961	1.55554	4.08769	5.30511	16.784	4.59104	0.19264	0.170319	2.21403	2.5584	2.06104	0.53853	0.335496	0.220515	0.435965	0.163284	0.292532	0.212741	0.25478	0.212069	83.1314	0.388233	0.0231284	0.103201	0.163066	433.185	3.45718
	70	Berlin	Berlin	AComA	anterior	1	2.73866	6.01592	4.46013	5.14203	0.926353	0.677527	0.872599	1.14923	0.86628	0.0713215	0.0734891	0.115846	2.68718	5.33453	20.3402	3.71192	0.188753	0.112585	0.513384	0.737803	0.963914	0.33825	0.237986	0.615656	0.753794	0.0294954	0.228253	0.320215	0.379482	0.308444	14.7596	0.291225	0.0884086	0.207463	0.331265	89.7299	1.84856
	71	Berlin	Berlin	PComA	posterior	0	3.68357	5.83159	3.89014	5.5107	0.286056	0.536064	0.690627	1.07077	0.683823	0.046294	0.0493813	0.104189	2.55889	5.53038	16.3267	3.62007	0.147759	0.111147	0.666062	1.01754	0.996442	0.0776572	0.276319	0.444329	0.638625	0.0625196	0.251935	0.292678	0.39453	0.321953	15.166	0.253506	0.0428728	0.240699	0.360837	105.098	1.5501
	72A	Berlin	Berlin	PComA	posterior	0	9.96892	14.708	12.1191	12.9636	4.61491	3.41888	3.82921	6.79631	3.79072	0.609259	0.647332	1.66603	5.58119	7.50057	23.8906	6.22572	0.37184	0.328784	1.32909	1.60125	1.72834	0.46293	0.272298	0.365694	0.557761	0.0588151	0.249905	0.156874	0.201279	0.180968	48.0231	0.352395	0.0122156	0.0644016	0.108885	248.305	2.98096
	72B	Berlin	Berlin	AComA	anterior	0	3.76859	5.09981	3.82504	4.47899	0.524671	0.452351	0.610848	0.840427	0.603419	0.038106	0.0409177	0.0724475	3.42065	4.48362	14.4632	4.178	0.151068	0.120456	0.840524	0.902009	0.998968	0.139222	0.279693	0.525981	0.717991	0.0687145	0.25387	0.353913	0.391605	0.290978	1.27283	0.245221	0.0943923	0.232651	0.293163	55.595	1.10865
	73	Berlin	Berlin	AComA	anterior	1	7.64029	10.5286	8.9231	7.517	2.01058	1.26599	1.42142	3.48252	1.355	0.112834	0.133039	0.611103	2.12271	4.86071	12.2211	2.91333	0.08901	0.0810364	1.57185	2.62253	1.54648	0.263155	0.338553	0.18464	0.389086	0.151871	0.296274	0.310402	0.368306	0.321255	93.888	0.399976	0.0506489	0.20297	0.378647	462.49	3.84862
	74	Berlin	Berlin	ICA	ICA	0	2.4221	6.88581	3.60693	6.76352	0.184884	0.509623	0.850694	1.48956	0.836737	0.0596583	0.064183	0.170948	4.64466	6.82311	21.5137	6.08197	0.327114	0.248901	0.354984	0.398242	0.991266	0.0763322	0.299622	0.348986	0.561732	0.0704973	0.276707	0.297575	0.350443	0.275947	20.6543	0.230547	0.0805803	0.163196	0.222967	93.4454	0.96147
	75A	Berlin	Berlin	PComA	posterior	0	2.27683	4.97406	3.15535	4.67016	0.73929	0.311576	0.487185	0.791807	0.478651	0.0262685	0.0285777	0.0662525	3.45291	4.61064	16.4628	4.05945	0.167075	0.125036	0.493821	0.560871	1.01291	0.324702	0.291383	0.39649	0.604505	0.0808042	0.26357	0.374372	0.427635	0.35071	7.34409	0.227864	0.0997122	0.274218	0.368541	72.7845	0.94663
	75B	Berlin	Berlin	BA	posterior	1	4.55647	6.18185	5.23496	3.88421	2.07231	0.421835	0.502877	1.20279	0.487401	0.0251226	0.0275581	0.124039	2.46648	2.87664	9.72531	2.69672	0.065566	0.0557253	1.58396	1.68964	1.35026	0.454806	0.324492	0.202537	0.405225	0.0883761	0.303623	0.461727	0.478157	0.29234	47.9316	0.282454	0.105414	0.283442	0.428829	171.297	1.48237
	76	Berlin	Berlin	PComA	posterior	1	4.97421	8.40529	5.92725	8.2964	2.74764	1.25495	1.40833	2.26996	1.38462	0.132691	0.143939	0.321589	2.93142	4.90731	13.8487	3.74533	0.12967	0.112982	1.01363	1.32811	1.69062	0.552378	0.27883	0.41261	0.609975	0.0781461	0.251447	0.272657	0.348077	0.308113	47.9381	0.366775	0.0539859	0.186139	0.288913	236.237	2.93518
	77	Berlin	Berlin	MCA	MCA	0	10.1646	15.2543	10.4916	15.2515	1.12022	3.82485	4.55871	7.66496	4.50655	0.80413	0.831483	1.99544	3.69289	15.2543	44.2399	6.16367	0.6817	0.442433	0.666342	1.64911	0.999816	0.110208	0.263487	0.402984	0.587942	0.0328974	0.255495	0.147983	0.166775	0.144986	30.2508	0.322424	0.0100245	0.043091	0.0778039	162.837	2.38771
	78	Berlin	Berlin	MCA	MCA	0	5.0197	7.73491	5.09557	7.19912	1.28935	0.956233	1.26451	1.92539	1.23602	0.1147	0.123305	0.251219	3.66031	5.91086	21.8215	5.12864	0.279787	0.169925	0.849234	0.978759	1.21795	0.256857	0.26691	0.456573	0.641958	0.0697858	0.248022	0.296437	0.343277	0.294419	34.3691	0.325117	0.0745742	0.203024	0.308544	211.068	2.41545
	79	Berlin	Berlin	ICA	ICA	0	9.20189	11.0621	9.77612	9.38841	5.0484	2.35152	2.59753	3.90012	2.57731	0.353279	0.369842	0.724253	4.47149	5.48142	18.1854	4.96639	0.22579	0.192502	1.67874	1.85283	1.71277	0.548627	0.255748	0.487785	0.660829	0.0447838	0.238638	0.181052	0.233978	0.206746	30.3493	0.335356	0.0156438	0.0738085	0.14567	129.073	2.74157
	80	Berlin	Berlin	AComA	anterior	1	8.13209	9.02187	8.30772	5.53219	5.60533	1.25837	1.40251	2.5661	1.36935	0.125222	0.137784	0.386531	3.08753	3.83147	12.4505	3.56549	0.11098	0.092911	2.12245	2.28078	1.44388	0.689286	0.298414	0.323965	0.533631	0.0911664	0.269926	0.296617	0.310492	0.2027	40.308	0.320704	0.0616407	0.126751	0.156017	158.831	1.67984
	81	Berlin	Berlin	ICA	ICA	0	21.5135	32.3416	25.6278	30.3435	9.08514	21.8419	22.4849	32.9014	22.5411	9.06115	9.56143	17.7458	2.96078	18.0265	50.3381	5.55603	0.6992	0.419187	1.19344	3.87211	1.68327	0.422299	0.259904	0.510607	0.68511	0.0523235	0.23099	0.0725841	0.134017	0.159496	116.852	0.651715	0.00413637	0.0316674	0.0696605	729.119	12.1292
	82A	Berlin	Berlin	ICA	ICA	0	2.03929	3.40046	2.10699	3.33952	0.102652	0.170853	0.249011	0.382251	0.24736	0.00968818	0.0102778	0.0222227	2.53639	3.34027	10.417	2.93778	0.076507	0.0665407	0.610518	0.694161	0.999774	0.050337	0.29481	0.435959	0.647114	0.0573723	0.271342	0.531612	0.58205	0.36796	1.51483	0.212663	0.245357	0.413967	0.447898	25.9228	0.694346
	82B	Berlin	Berlin	MCA	MCA	0	3.69787	5.04705	4.00632	3.65965	0.256796	0.367647	0.480183	0.802355	0.478725	0.0281831	0.0284386	0.0675808	2.9615	3.628	12.3884	3.58652	0.111078	0.0843856	1.01926	1.03105	1.00873	0.0694444	0.25747	0.417028	0.59665	0.00898573	0.255257	0.455512	0.456021	0.212468	15.2292	0.242523	0.170916	0.207221	0.271942	32.3094	0.939696
	82C	Berlin	Berlin	ACA	anterior	0	1.48646	3.13423	1.81859	3.06161	0.0019861	0.128178	0.203696	0.325221	0.202696	0.00709191	0.00722152	0.0174398	2.66932	3.06186	9.72407	3.0653	0.074518	0.0641914	0.485475	0.48493	0.999918	0.00133613	0.30101	0.406651	0.623256	0.0179477	0.295992	0.593456	0.596151	0.330365	-4.09511	0.19351	0.294911	0.427393	0.549954	10.6104	0.636523
	83	Berlin	Berlin	PComA	posterior	0	10.5028	13.5584	11.0073	11.4694	5.8803	3.37202	4.0484	5.90708	3.94952	0.644637	0.709195	1.35	6.23324	9.92076	32.5593	7.09476	0.5775	0.485678	1.05867	1.48036	1.1561	0.559879	0.274774	0.477509	0.668607	0.0910289	0.246006	0.152093	0.198025	0.195375	35.7692	0.361809	0.00962292	0.0713057	0.131991	235.187	3.55119
	84A	Berlin	Berlin	ICA	ICA	0	6.33085	8.28178	6.77165	7.74903	2.95684	1.35719	1.57766	2.22653	1.56714	0.170384	0.177311	0.312403	3.68203	5.59804	18.2673	4.59728	0.20995	0.161887	1.1309	1.37709	1.38424	0.467053	0.247247	0.545398	0.70385	0.0390688	0.232134	0.241075	0.287248	0.21914	20.9112	0.302029	0.0469513	0.113014	0.16681	100.239	1.87157
	84B	Berlin	Berlin	MCA	MCA	0	3.50865	5.38988	3.90864	3.58237	0.036032	0.362982	0.503002	0.916713	0.496957	0.0285838	0.0301774	0.0825322	3.10913	3.71265	13.3718	4.00769	0.133975	0.0906592	0.945053	0.875479	0.964911	0.0102695	0.277948	0.346335	0.542108	0.0528087	0.260351	0.393307	0.44209	0.314069	19.405	0.241309	0.101981	0.26721	0.353985	94.9291	1.06408
	85	Berlin	Berlin	MCA	MCA	0	2.99611	5.40138	3.55208	5.03788	1.30061	0.435419	0.612613	0.91661	0.610681	0.0422073	0.0429184	0.0825183	2.94942	4.59645	16.1181	4.34945	0.175262	0.106475	0.65183	0.688847	1.09604	0.434099	0.238064	0.511491	0.666239	0.0165678	0.23196	0.405768	0.421804	0.250105	13.9193	0.250293	0.163997	0.215006	0.237997	56.8284	1.00147
	86	Berlin	Berlin	MCA	MCA	0	2.57483	3.96562	2.60358	3.79916	0.122664	0.268691	0.368824	0.505887	0.367665	0.0188104	0.0192236	0.033834	3.05827	3.82388	11.7629	3.36564	0.098974	0.091848	0.673355	0.765033	0.993535	0.0476399	0.261608	0.55596	0.726774	0.0214934	0.253189	0.494284	0.522777	0.3064	4.89101	0.239885	0.22099	0.313381	0.342188	26.1584	0.870975
	87	Berlin	Berlin	AComA	anterior	1	3.97058	5.63281	4.38595	4.4636	0.941945	0.53126	0.621162	1.00118	0.614005	0.0392139	0.041336	0.094198	2.40234	3.99941	11.6544	2.83996	0.082745	0.0754606	0.992793	1.39811	1.11607	0.237231	0.278457	0.416292	0.613282	0.0513375	0.261266	0.401333	0.461815	0.355189	30.3525	0.310854	0.127117	0.264918	0.41031	111.064	1.81598
	88A	Berlin	Berlin	MCA	MCA	0	1.48939	3.14872	1.66361	3.14685	0.16991	0.101674	0.15497	0.311471	0.152705	0.00451849	0.00480125	0.0163456	1.87054	3.14872	9.0639	2.25206	0.051031	0.0462585	0.473015	0.661348	0.999405	0.11408	0.313011	0.276435	0.49027	0.0588919	0.295097	0.631412	0.693543	0.534911	9.18855	0.209982	0.239146	0.80096	1.15885	98.5266	0.957376
	88B	Berlin	Berlin	MCA	MCA	0	2.30407	3.78362	2.57727	3.25777	0.475355	0.190669	0.258325	0.453608	0.256208	0.0107596	0.0112361	0.0287273	2.48012	2.74861	9.78141	2.68015	0.065539	0.0535398	0.838266	0.85968	1.18524	0.206311	0.26985	0.374542	0.564822	0.0424079	0.254609	0.564732	0.63225	0.436969	20.1225	0.248117	0.261875	0.507152	0.656585	83.0665	1.07255
	89	Berlin	Berlin	ICA	ICA	0	5.72821	7.95096	6.45933	5.90316	0.0453407	0.885008	1.21012	2.14174	1.16721	0.0929698	0.105075	0.294729	5.16381	6.09235	19.8904	5.67515	0.282202	0.247085	0.940229	1.00935	0.968945	0.00791534	0.325131	0.315441	0.544983	0.115209	0.293715	0.282894	0.286881	0.214215	18.4352	0.265648	0.0520104	0.110503	0.229385	88.3341	1.65649
	90	Berlin	Berlin	MCA	MCA	0	4.0157	6.81692	4.50575	6.38701	1.05495	0.690776	0.886275	1.46155	0.879858	0.0674623	0.070755	0.166148	3.64735	5.59119	18.7943	4.02424	0.189082	0.160166	0.718218	0.997877	1.14234	0.262706	0.27706	0.406038	0.602003	0.0465361	0.259127	0.353245	0.38435	0.289827	31.0778	0.302208	0.114197	0.180514	0.260067	109.95	1.56134
	91	Berlin	Berlin	AComA	anterior	0	6.14665	7.78356	6.32247	6.89451	2.71183	1.23146	1.4148	1.9033	1.41177	0.151713	0.153591	0.246907	3.84495	5.1983	17.0867	4.22105	0.18031	0.156979	1.18243	1.45619	1.3263	0.441189	0.226621	0.614455	0.74175	0.0122249	0.221923	0.273858	0.288867	0.17954	12.4206	0.289176	0.0685645	0.0949743	0.136785	43.8476	1.49941
	92	Berlin	Berlin	PComA	posterior	0	7.02282	12.4406	7.7391	12.1622	1.57191	2.31299	2.94084	4.89806	2.90408	0.402422	0.432581	1.01932	7.59994	9.25484	32.0515	7.37675	0.59109	0.552419	0.758826	0.952021	1.31414	0.223829	0.279578	0.394795	0.592904	0.069717	0.25347	0.198367	0.239948	0.200121	49.8043	0.341022	0.0358617	0.0786268	0.118234	206.468	2.27414
	93	Berlin	Berlin	PComA	posterior	1	10.3727	16.4219	12.5134	15.8611	2.89436	4.49205	4.99847	8.48173	4.96638	0.796786	0.945744	2.32274	5.8541	9.28825	29.0793	6.52463	0.47433	0.427055	1.11675	1.58977	1.70765	0.279036	0.335754	0.343038	0.585539	0.157503	0.260134	0.163064	0.239862	0.233761	97.0603	0.480708	0.0180994	0.0870922	0.128475	487.833	4.6379
	94	Berlin	Berlin	MCA	MCA	0	19.1833	27.0089	21.4245	25.0691	8.69313	14.9585	16.042	22.9176	16.0103	5.76344	5.82241	10.3164	10.2489	12.6457	43.4304	9.68723	1.0518	1.01791	1.51699	1.98027	1.98243	0.453162	0.229341	0.55867	0.698604	0.0101284	0.225626	0.0883098	0.0952313	0.0714239	28.6053	0.349566	0.00717729	0.0122506	0.0228305	123.417	2.84877
	95	Berlin	Berlin	AComA	anterior	1	6.26083	8.94706	7.3499	6.98955	2.23376	1.13517	1.35076	2.51484	1.34062	0.128469	0.133377	0.375007	4.57687	4.98103	16.9512	4.84803	0.20545	0.179051	1.25694	1.29142	1.40324	0.356784	0.271044	0.342579	0.533084	0.0367987	0.258205	0.286296	0.302327	0.200169	35.2469	0.296183	0.0680168	0.112345	0.1468	124.83	1.46153
	96	Berlin	Berlin	ICA	ICA	0	5.20162	13.2908	8.49106	13.1045	0.615282	2.47396	3.25054	5.88293	3.16596	0.379443	0.457207	1.34173	6.60276	9.82052	38.8454	7.12569	0.692	0.509272	0.529669	0.729981	1.3344	0.118287	0.364571	0.282802	0.538161	0.170084	0.2992	0.230369	0.324439	0.337947	121.985	0.511924	0.0396554	0.148056	0.249256	593.122	4.96883
	97A	Berlin	Berlin	ICA	ICA	0	1.70214	5.67127	2.99316	5.67122	0.10009	0.283046	0.494612	1.01059	0.48917	0.0185952	0.0210037	0.095529	4.1802	5.67127	18.1764	4.53607	0.206124	0.186195	0.300134	0.375247	0.999991	0.0588021	0.449257	0.194655	0.484045	0.114668	0.409246	0.320071	0.333769	0.279744	-5.34839	0.179971	0.084531	0.189319	0.33235	52.2501	0.772425
	97B	Berlin	Berlin	AComA	anterior	0	5.38078	8.21404	5.55393	7.96811	1.93244	1.23721	1.57445	2.12401	1.57207	0.16989	0.172586	0.291078	5.56264	7.2939	22.9902	5.82613	0.33486	0.318662	0.737709	0.923559	1.09244	0.359137	0.251059	0.583658	0.740142	0.0156202	0.244301	0.267843	0.271021	0.137469	11.4236	0.266482	0.0705457	0.0796586	0.0922368	34.6418	1.14327
	98	Berlin	Berlin	PICA	posterior	1	4.52422	5.584	4.79009	4.31941	2.52783	0.481356	0.538588	0.979842	0.526788	0.0312329	0.0332248	0.0912027	1.42484	2.95567	8.69177	2.09081	0.045432	0.0330759	1.5307	2.16387	1.4614	0.558731	0.277375	0.342456	0.537626	0.0599527	0.263467	0.453297	0.471642	0.278489	31.7	0.293726	0.130559	0.274682	0.41899	114.179	1.68106
	99	Berlin	Berlin	PComA	posterior	0	6.0668	9.7252	6.55444	9.27422	1.31438	1.4589	1.95328	2.9714	1.94449	0.23831	0.242207	0.481632	6.69231	7.54482	27.6554	7.02345	0.48559	0.396566	0.804101	0.863792	1.22922	0.216652	0.241254	0.494796	0.654402	0.0160893	0.236457	0.243174	0.246088	0.119326	19.6645	0.260357	0.0577417	0.0641642	0.0638973	51.7203	0.999836
	100A	Berlin	Berlin	MCA	MCA	1	6.73828	16.284	12.4706	15.0551	0.72618	3.62011	3.99955	8.33053	3.96255	0.644888	0.67258	2.26091	4.7137	7.34143	25.5952	5.35163	0.34244	0.271789	0.917842	1.25911	2.0507	0.107769	0.276971	0.285234	0.475666	0.0411726	0.263297	0.181862	0.232975	0.223105	89.6887	0.435809	0.027807	0.0804203	0.134791	433.125	3.96482
	100B	Berlin	Berlin	ICA	ICA	0	2.36379	3.70705	2.47167	3.37927	0.531172	0.221493	0.311082	0.44505	0.30921	0.013589	0.0143609	0.0279181	3.03348	3.30395	11.3816	3.08277	0.087717	0.0787163	0.715445	0.766775	1.0228	0.224712	0.293121	0.486744	0.694777	0.0537531	0.271011	0.483452	0.533585	0.369671	0.415974	0.227927	0.19549	0.369487	0.501405	30.8573	0.948563
	100C	Berlin	Berlin	ICA	ICA	0	8.46722	16.1592	11.3836	16.159	4.62699	3.85845	4.256	8.20345	4.02922	0.506238	0.705382	2.20937	3.93607	5.47923	16.9174	4.03774	0.17077	0.169384	1.54533	2.09702	2.94914	0.546459	0.394906	0.229132	0.491162	0.282321	0.285357	0.215348	0.311801	0.312006	151.925	0.592597	0.0256645	0.158677	0.256377	935.858	7.9113
	100D	Berlin	Berlin	MCA	MCA	0	2.48785	4.05314	2.68801	3.62014	0.707096	0.258442	0.348721	0.516244	0.346901	0.0164297	0.0171803	0.0348784	2.88797	3.5551	11.3198	3.12581	0.088459	0.080637	0.699795	0.795904	1.01829	0.28422	0.28492	0.471056	0.671971	0.0436934	0.267146	0.481867	0.526263	0.356889	6.66574	0.242583	0.197002	0.375055	0.483083	54.0777	1.07295
	100E	Berlin	Berlin	MCA	MCA	0	1.91448	3.74363	1.98459	3.74323	0.0761772	0.186227	0.285319	0.442497	0.281924	0.0108053	0.0124713	0.0276783	2.72299	3.74363	12.259	3.1225	0.095697	0.0800623	0.511396	0.613124	0.999894	0.0397901	0.334573	0.39039	0.637121	0.133587	0.276533	0.534533	0.558814	0.295171	4.86178	0.209691	0.249662	0.355025	0.369207	25.014	0.660499
	101	Berlin	Berlin	PComA	posterior	1	5.04826	6.95551	5.62634	4.80276	1.59061	0.668681	0.821307	1.52528	0.808315	0.0580143	0.0619872	0.177132	3.92746	4.18872	14.0806	3.9667	0.139634	0.129206	1.20521	1.27266	1.14659	0.31508	0.288377	0.32752	0.529946	0.0640927	0.268013	0.354271	0.362535	0.232774	26.3046	0.275844	0.0934998	0.198107	0.264676	140.458	1.49369
	102	Berlin	Berlin	AComA	anterior	1	5.93084	7.93624	6.36213	7.12774	3.08076	1.17782	1.31846	2.1625	1.30157	0.119849	0.129143	0.299026	3.26116	4.72422	14.3746	3.44358	0.12375	0.121002	1.25541	1.72229	1.50877	0.519448	0.28315	0.400797	0.601882	0.0719667	0.256205	0.302722	0.359106	0.305243	48.9692	0.371276	0.077393	0.185454	0.284569	219.141	2.76409
	103	Berlin	Berlin	PCA	posterior	1	5.60216	9.19463	6.12636	7.31764	1.73817	1.70831	1.83586	2.66104	1.85828	0.209173	0.223409	0.40818	1.68971	6.94217	22.4235	2.67523	0.14997	0.092129	0.806975	2.09409	1.05409	0.310268	0.272165	0.512453	0.698328	0.063723	0.230217	0.253878	0.335379	0.338479	54.3321	0.440075	0.0497527	0.171139	0.468292	262.402	6.40195
	104	Berlin	Berlin	MCA	MCA	0	4.62886	17.0086	8.80957	16.1894	0.942233	2.43698	3.84852	9.08838	3.75237	0.562082	0.603624	2.57634	9.51566	16.0508	57.1674	9.20377	1.31539	1.19957	0.288389	0.502931	1.00864	0.203556	0.303318	0.21817	0.412875	0.0688216	0.287653	0.173674	0.199252	0.168317	69.4501	0.300448	0.0157665	0.055759	0.0908059	303.266	1.78733
	105	Berlin	Berlin	ICA	ICA	1	7.09216	9.26324	7.60198	7.20827	3.53605	1.22174	1.38337	2.69573	1.33837	0.113755	0.133482	0.416186	3.42732	4.11834	13.3793	3.48688	0.11663	0.110858	1.72209	2.03396	1.75029	0.498586	0.326697	0.273326	0.496478	0.147789	0.275313	0.303508	0.36308	0.301859	68.1649	0.376518	0.0523326	0.218631	0.294731	369.005	2.91029
	106	Berlin	Berlin	MCA	MCA	1	8.17732	10.5138	8.75866	7.40948	3.08223	1.4936	1.77073	3.48156	1.71242	0.151139	0.190047	0.610849	4.20913	5.87484	18.33	4.77512	0.21882	0.194213	1.39192	1.71248	1.26122	0.376924	0.364013	0.247424	0.491855	0.20473	0.283478	0.28126	0.348842	0.310592	83.6161	0.407511	0.0438471	0.208969	0.311367	478.957	3.73734
	107	Berlin	Berlin	PComA	posterior	1	8.59789	10.2314	8.8377	7.09383	2.85095	1.48818	1.80337	3.37222	1.73949	0.165955	0.200483	0.582301	4.58045	5.7811	20.0022	5.02565	0.25131	0.207974	1.48724	1.7108	1.22707	0.331588	0.333636	0.284998	0.51583	0.172226	0.270922	0.255326	0.333988	0.315799	73.0152	0.394235	0.0424637	0.195427	0.283566	424.433	3.39559
	108	Berlin	Berlin	AComA	anterior	1	3.88619	6.10028	4.3391	5.59092	0.678522	0.516243	0.731526	1.21957	0.721528	0.0479696	0.0516332	0.126643	4.27625	4.98611	17.482	4.69705	0.205285	0.167462	0.779402	0.827367	1.1213	0.174598	0.297686	0.378777	0.591626	0.0709539	0.272449	0.345872	0.37716	0.293212	17.4962	0.259256	0.093469	0.190738	0.291885	85.111	1.25908
	109	Berlin	Berlin	BA	posterior	1	13.9182	17.0125	13.9492	16.9347	6.5517	6.05825	6.41579	9.09966	6.38609	1.43287	1.46341	2.58114	5.53601	7.17851	23.5156	5.57656	0.32784	0.31212	1.93887	2.49584	2.35908	0.47073	0.236089	0.555128	0.701794	0.0208701	0.228859	0.13674	0.15434	0.123046	31.3366	0.360301	0.0164586	0.0327914	0.0583266	137.452	2.92173
	110	Berlin	Berlin	BA	posterior	0	12.5908	18.6205	14.3803	14.3732	6.54758	4.82902	5.40817	10.8926	5.3281	0.998949	1.06393	3.38044	4.9172	12.4716	34.4566	5.79372	0.49908	0.481647	1.00956	2.17318	1.15248	0.52003	0.280114	0.295509	0.489147	0.0610721	0.260342	0.138158	0.155122	0.120139	44.4221	0.320169	0.0103911	0.0374056	0.061322	224.235	2.39008
	111	Berlin	Berlin	AComA	anterior	0	6.02507	9.77393	6.78526	8.87764	1.96777	1.74142	2.20373	3.00115	2.19025	0.285304	0.293883	0.488884	4.5051	8.37753	31.3908	5.71926	0.44883	0.296422	0.719194	1.05347	1.0597	0.326598	0.240516	0.583581	0.729803	0.0291931	0.230104	0.197026	0.22719	0.165322	11.0272	0.27009	0.0290557	0.0757108	0.109095	80.8157	1.56451
	112	Berlin	Berlin	BA	posterior	1	7.00008	10.3749	7.55264	9.32522	3.3069	1.7788	2.27989	3.44274	2.26194	0.285566	0.301336	0.600662	6.06322	8.09238	28.0111	6.89926	0.48314	0.385362	0.865022	1.01461	1.15235	0.472409	0.264137	0.475418	0.657017	0.0523342	0.243294	0.18449	0.255076	0.254763	33.5108	0.333842	0.0257002	0.107401	0.171309	194.24	2.45206
	113A	Berlin	Berlin	MCA	MCA	0	9.48835	11.5418	9.84942	7.9076	4.66123	2.10324	2.43299	4.18955	2.38996	0.308053	0.322804	0.806351	3.48564	7.31356	23.602	4.85925	0.28672	0.200217	1.29736	1.95264	1.08122	0.491258	0.267456	0.382033	0.570458	0.0456962	0.25762	0.205986	0.209212	0.1286	20.7993	0.28025	0.0257619	0.0600026	0.102073	100.045	1.76198
	113B	Berlin	Berlin	MCA	MCA	0	6.24173	8.75744	6.90653	8.75268	2.4154	1.55232	1.84777	2.41959	1.84134	0.224014	0.226917	0.353906	3.93336	6.50086	22.8134	5.06756	0.28902	0.200828	0.96014	1.23171	1.34639	0.386976	0.231123	0.632977	0.761012	0.0127931	0.227193	0.24527	0.252614	0.158588	10.8469	0.289584	0.0559178	0.0798781	0.102794	53.8014	1.44553
	114	Berlin	Berlin	MCA	MCA	1	3.62159	6.79302	4.23407	6.75299	0.367038	0.597328	0.920375	1.50158	0.909591	0.0675597	0.071597	0.173021	4.79586	6.79302	21.5199	5.80418	0.312263	0.25587	0.533133	0.623962	0.994106	0.101347	0.300019	0.390471	0.605754	0.0563886	0.280928	0.278448	0.316595	0.253638	9.43934	0.231652	0.0578271	0.14076	0.24018	68.1973	1.17429
	115A	Hanover	Magdeburg	MCA	MCA	1	4.34017	6.19463	5.01853	5.75327	2.07191	0.633838	0.737691	1.21308	0.720542	0.0487795	0.0538703	0.125634	2.98122	3.76334	11.2191	3.09129	0.086704	0.0881167	1.15328	1.404	1.52876	0.47738	0.288831	0.388267	0.593979	0.0945005	0.257837	0.400561	0.435775	0.318044	35.3947	0.32404	0.115487	0.280278	0.420322	170.562	2.19864
	115B	Hanover	Magdeburg	MCA	MCA	0	1.149	2.12274	1.22208	2.04952	0.0990582	0.0619189	0.0914088	0.143681	0.0889758	0.00199357	0.00217388	0.00512122	1.66684	2.04992	6.3046	1.71664	0.0270569	0.0268362	0.560507	0.669327	0.999806	0.0862129	0.316682	0.389276	0.619259	0.082943	0.295346	0.973743	0.974097	0.333739	4.15909	0.203828	0.851959	0.944977	0.784181	8.04661	0.570548
	116A	Hanover	Magdeburg	AComA	anterior	1	4.05519	7.2757	4.56836	7.26689	1.82681	0.794769	0.957269	1.66303	0.935021	0.0731523	0.0803515	0.201662	3.79835	4.68755	14.8794	3.77036	0.140252	0.13984	0.865099	1.07555	1.55025	0.450486	0.281977	0.362748	0.56224	0.0895956	0.253375	0.327864	0.371968	0.297726	35.3163	0.314188	0.074165	0.231299	0.414318	206.1	2.66204
	116B	Hanover	Magdeburg	AComA	anterior	0	1.0312	2.74424	1.42484	2.5631	0.132929	0.0783257	0.127545	0.236627	0.12303	0.00290104	0.00343072	0.0108236	2.05829	2.64613	8.18776	2.18396	0.0447043	0.0427769	0.389701	0.47217	0.968622	0.128907	0.365401	0.26803	0.519931	0.154391	0.315457	0.790889	0.790889	0.300283	8.52829	0.188409	0.626764	0.663358	0.529479	24.9118	0.511401
	117A	Hanover	Magdeburg	BA	posterior	1	8.47605	10.8531	8.72145	9.95597	2.31932	2.26897	2.56947	3.72342	2.54655	0.34245	0.364188	0.675595	4.87956	7.27436	20.7773	5.34391	0.27758	0.278782	1.1652	1.58611	1.36864	0.273632	0.262232	0.506887	0.683928	0.05969	0.238188	0.197578	0.224636	0.170395	22.2771	0.312744	0.0339771	0.068019	0.114156	101.54	2.15055
	117B	Hanover	Magdeburg	AComA	anterior	0	4.08769	6.38614	4.27115	6.26669	1.45012	0.622403	0.797592	1.28159	0.77913	0.0524287	0.0594049	0.136426	3.63314	5.21595	16.1634	3.87856	0.156727	0.148835	0.78369	1.05392	1.20145	0.354753	0.309903	0.384302	0.607942	0.117435	0.267331	0.349038	0.395464	0.336682	26.2919	0.304459	0.10617	0.21523	0.343204	119.503	1.77935
	118A	Hanover	Magdeburg	AComA	anterior	0	5.03862	7.3854	6.02491	5.71202	3.28695	0.847255	0.980775	1.7142	0.961208	0.0767105	0.0831974	0.211042	3.4659	3.9334	13.1476	3.46688	0.113953	0.107072	1.28098	1.45336	1.45218	0.652351	0.27907	0.363485	0.560731	0.0779702	0.254162	0.338684	0.345013	0.207846	27.427	0.29107	0.0949433	0.149651	0.228893	104.142	1.67075
	118B	Hanover	Magdeburg	PComA	posterior	1	4.52817	6.22374	4.69342	5.82576	1.53154	0.584162	0.710198	1.21832	0.685564	0.0400099	0.0487822	0.126448	3.02711	4.42767	12.6461	3.20737	0.101402	0.105267	1.0227	1.4118	1.31576	0.338226	0.345055	0.316413	0.562715	0.179826	0.278445	0.418346	0.481046	0.370423	49.7827	0.339854	0.14059	0.338653	0.470858	228.326	2.28433
	119	Hanover	Magdeburg	MCA	MCA	1	1.13176	2.73935	1.45768	2.69894	0.00028525	0.0787731	0.137492	0.248065	0.128964	0.00275364	0.00362609	0.0116178	2.25381	2.73935	9.02637	2.22419	0.0501909	0.0484903	0.413148	0.508839	0.985251	0.000252042	0.415285	0.23702	0.519879	0.240601	0.341096	0.716844	0.716844	0.171917	0.716923	0.164644	0.475973	0.494153	0.291769	-2.4521	0.349963
	120A	Hanover	Magdeburg	MCA	MCA	1	4.88065	6.75836	5.61338	6.20161	3.0568	0.747097	0.850379	1.5515	0.82615	0.0597187	0.0656845	0.18172	2.50946	4.16411	11.0131	2.87125	0.079053	0.0820716	1.17208	1.69984	1.4893	0.62631	0.290168	0.328631	0.532485	0.0908248	0.265198	0.359039	0.360131	0.183249	26.541	0.277262	0.0834352	0.153608	0.221404	89.6511	1.40665
	120B	Hanover	Magdeburg	ICA	ICA	1	2.32478	8.33476	5.29491	8.15409	0.577972	0.471799	0.673218	2.18241	0.626496	0.0316774	0.040349	0.303164	3.04555	6.03078	16.3661	3.78092	0.154697	0.144255	0.385485	0.614871	1.35208	0.248614	0.38663	0.104489	0.287066	0.214914	0.329281	0.418144	0.420431	0.192147	75.2098	0.251533	0.135303	0.181443	0.206655	215.113	0.927383
	121	Hanover	Magdeburg	ICA	ICA	1	18.7038	24.223	19.7908	22.4526	9.80795	12.6661	13.1487	18.524	13.1261	4.17017	4.30658	7.49681	4.94342	11.5654	29.4114	6.25607	0.46	0.449033	1.61722	2.98971	1.94136	0.524381	0.242398	0.556259	0.708599	0.031675	0.227296	0.0921295	0.113878	0.110383	38.2623	0.407198	0.00800468	0.0190046	0.0494312	180.146	5.04724
	122	Hanover	Magdeburg	ICA	ICA	0	6.66675	9.42866	7.75338	9.24594	3.66838	1.76311	2.01753	2.88141	1.99053	0.23326	0.250814	0.459919	3.31171	6.8081	19.8105	4.59191	0.22742	0.177079	0.979238	1.45184	1.35808	0.550251	0.269312	0.507176	0.690818	0.0699882	0.243362	0.237215	0.241886	0.131837	15.8267	0.286762	0.0456667	0.0757587	0.10536	73.7111	1.61112
	123A	Hanover	Magdeburg	PComA	posterior	1	5.23039	7.27945	5.50138	6.49587	1.29602	0.962319	1.18048	1.70127	1.15646	0.0933258	0.108783	0.208656	4.46893	5.19759	17.0579	4.55253	0.194141	0.182429	1.00631	1.1489	1.24979	0.247786	0.317119	0.44727	0.679765	0.14209	0.25905	0.295997	0.362552	0.332504	33.3987	0.347513	0.075661	0.188657	0.302576	155.409	2.38844
	123B	Hanover	Magdeburg	MCA	MCA	0	2.98353	4.95075	3.0685	4.23829	0.720707	0.31076	0.403323	0.770048	0.396155	0.0178257	0.0201079	0.0635405	2.61156	4.2018	11.3374	3.01287	0.085395	0.0861836	0.71006	0.990262	1.00868	0.241562	0.33884	0.280541	0.514455	0.113498	0.296282	0.459498	0.545481	0.457432	35.031	0.287624	0.192993	0.368042	0.588272	125.531	1.53105
	124A	Hanover	Magdeburg	ACA	anterior	1	2.91419	3.67741	3.0746	2.62979	1.19675	0.19673	0.240415	0.431308	0.230022	0.00824943	0.00965664	0.0266351	1.6725	2.35355	6.66496	1.99803	0.033292	0.0309158	1.23821	1.45853	1.11737	0.410664	0.318728	0.30972	0.533313	0.145724	0.276014	0.645517	0.664064	0.437311	23.0265	0.275204	0.240239	0.729883	0.920502	150.513	1.48935
	124B	Hanover	Magdeburg	AComA	anterior	0	1.20139	3.18381	1.67416	2.91256	0.185419	0.0961809	0.166101	0.321616	0.159167	0.00372619	0.00473257	0.0171506	2.55836	3.18381	9.66692	2.60625	0.0629861	0.0639731	0.377345	0.460965	0.914804	0.154337	0.420396	0.217262	0.494898	0.212649	0.348622	0.587514	0.588745	0.285932	-5.81298	0.161255	0.347476	0.428829	0.381291	9.75196	0.39484
	124C	Hanover	Magdeburg	AComA	anterior	0	2.6714	4.43215	3.20938	4.07548	1.19983	0.28293	0.349035	0.626133	0.345532	0.0160407	0.016974	0.046588	2.53729	3.16266	9.17305	2.72982	0.062602	0.0630251	0.844667	0.978598	1.28862	0.449138	0.293463	0.34431	0.551851	0.0549817	0.273681	0.565806	0.567867	0.183751	26.7579	0.251809	0.282894	0.308731	0.257547	53.8287	0.861349
	125	Hanover	Magdeburg	ICA	ICA	0	7.20423	8.78414	7.81769	6.95602	3.94573	1.36994	1.47733	2.43465	1.45955	0.148114	0.156122	0.357214	3.10488	3.6304	11.7176	3.05898	0.08961	0.0885296	1.98442	2.35511	1.91605	0.547696	0.263815	0.414638	0.599491	0.0512904	0.246692	0.269435	0.29746	0.217897	30.9307	0.32275	0.0531845	0.124177	0.194132	140.585	2.19434
	126A	Hanover	Magdeburg	MCA	MCA	1	8.46613	13.905	9.02129	13.1484	0.800678	2.85655	3.33566	6.33057	3.13558	0.362253	0.49613	1.49775	3.68833	7.97105	23.0758	4.83676	0.27903	0.230906	1.06211	1.75037	1.64952	0.0945743	0.377942	0.241865	0.495307	0.269843	0.278855	0.225587	0.289709	0.32922	105.626	0.536767	0.0322097	0.148109	0.424514	646.131	9.67765
	126B	Hanover	Magdeburg	MCA	MCA	0	5.41017	7.11702	5.69703	7.11701	1.111	0.958616	1.10033	1.71645	1.06709	0.083407	0.0970983	0.211456	3.51367	3.85787	12.669	3.42486	0.108474	0.106463	1.40237	1.57968	1.8448	0.205354	0.313341	0.39444	0.621684	0.141005	0.263071	0.346512	0.392563	0.341009	45.0843	0.378789	0.0962634	0.268674	0.401334	266.984	3.14838
	127A	Hanover	Magdeburg	AComA	anterior	1	2.66323	4.39825	3.4184	3.65174	1.12249	0.259819	0.319403	0.608751	0.314343	0.0142122	0.0154516	0.0446615	2.23386	2.84255	9.3858	2.32368	0.054524	0.0498717	0.936917	1.14613	1.28467	0.421477	0.283563	0.318221	0.516374	0.0802137	0.254494	0.593912	0.593912	0.180265	30.7183	0.251758	0.315996	0.330575	0.284773	60.1397	0.879509
	127B	Hanover	Magdeburg	MCA	MCA	0	2.09768	4.26272	2.61644	3.71368	0.021802	0.235818	0.32291	0.57611	0.315846	0.0137334	0.0148414	0.041118	3.00014	3.71454	10.7779	2.97008	0.080028	0.0875258	0.564722	0.706271	0.999768	0.0103934	0.303078	0.334	0.548239	0.074658	0.282135	0.537914	0.568855	0.350933	21.8004	0.248195	0.239378	0.42084	1.60372	92.9357	3.04285
	128A	Hanover	Magdeburg	ICA	ICA	1	1.42894	3.37793	1.85266	3.37707	0.224378	0.119108	0.20985	0.389237	0.19572	0.0053272	0.00661695	0.0228347	2.66177	3.37793	11.376	2.6938	0.076612	0.0706173	0.423024	0.530456	0.999746	0.157023	0.401811	0.233295	0.50283	0.194916	0.355331	0.506686	0.522808	0.311022	-7.98814	0.16328	0.231874	0.306059	0.413663	-5.19981	0.449479
	128B	Hanover	Magdeburg	ICA	ICA	0	1.27511	5.12983	2.89142	4.33593	0.307722	0.177143	0.29178	0.826715	0.27504	0.00796932	0.0104699	0.0706817	2.88535	4.08806	12.5803	3.1127	0.097897	0.0926417	0.31191	0.409647	1.06063	0.241331	0.443209	0.112749	0.33269	0.238836	0.370425	0.536531	0.542712	0.37076	39.201	0.218431	0.241115	0.361633	0.569773	137.911	0.872143
	129A	Hanover	Magdeburg	BA	posterior	1	2.81792	5.02693	3.39197	4.3481	1.36803	0.315488	0.392376	0.794583	0.385454	0.0186657	0.0202398	0.0666013	2.674	3.64053	10.2017	2.74331	0.069966	0.0764566	0.77404	1.0272	1.19436	0.485477	0.299302	0.28026	0.485102	0.0777725	0.273489	0.500619	0.545745	0.363786	37.2317	0.276604	0.195034	0.407727	0.620797	157.81	1.63366
	129B	Hanover	Magdeburg	SCA	posterior	0	1.29268	2.60265	1.51852	2.54801	0.128269	0.0959626	0.143506	0.213889	0.138307	0.00366609	0.00458251	0.00930154	1.94092	2.4384	8.08247	2.09562	0.0423444	0.0371709	0.530134	0.616849	1.04495	0.0992271	0.340171	0.394137	0.646631	0.199983	0.262085	0.841092	0.872934	0.446988	13.8859	0.234801	0.691391	0.831776	0.948175	41.5741	0.896121
	130A	Hanover	Magdeburg	MCA	MCA	1	7.17132	8.73346	7.73308	5.17262	2.23646	0.999598	1.10433	2.39938	1.08217	0.0868262	0.094273	0.349479	2.9323	3.50853	10.8412	3.04661	0.082572	0.0808022	2.04397	2.35387	1.4743	0.311862	0.304529	0.248445	0.451021	0.0789924	0.280054	0.314557	0.34065	0.238084	48.8513	0.31387	0.0554611	0.15728	0.237478	200.304	1.93985
	130B	Hanover	Magdeburg	AComA	anterior	0	4.24659	6.28156	4.78787	4.99709	1.21883	0.529138	0.633872	1.24208	0.622673	0.0378641	0.0419602	0.130166	2.59792	4.48972	11.9415	3.1331	0.093535	0.0916082	0.945848	1.3554	1.11301	0.287014	0.304924	0.290891	0.501315	0.0976185	0.268809	0.397775	0.439753	0.3109	38.2543	0.292244	0.124656	0.259082	0.359228	156.08	1.6011
	131A	Hanover	Magdeburg	BA	posterior	0	4.86285	6.9603	6.29693	6.26342	3.04467	0.61733	0.69087	1.55567	0.648717	0.0346212	0.0442776	0.182453	1.60365	2.31114	6.68704	1.87748	0.031387	0.0291088	2.1041	2.59009	2.71011	0.626109	0.371487	0.189754	0.417001	0.218087	0.304655	0.461533	0.524087	0.447064	84.3986	0.401753	0.137849	0.440401	0.789634	445.2	3.93778
	131B	Hanover	Magdeburg	BA	posterior	1	3.99237	6.10939	4.67928	5.53597	1.91369	0.60173	0.685079	1.17312	0.679527	0.046891	0.0493819	0.119478	2.81819	3.44842	10.4144	2.98806	0.077797	0.0763273	1.15774	1.33611	1.60536	0.479337	0.265497	0.392464	0.579246	0.0504419	0.245871	0.396668	0.431318	0.278658	31.7846	0.299242	0.13644	0.222187	0.29438	107.42	1.55366
	132A	Hanover	Magdeburg	PComA	posterior	0	4.35944	8.25781	5.05648	7.90101	0.962067	0.957312	1.18998	2.14274	1.1661	0.099087	0.112324	0.294936	4.64716	5.22835	18.1276	4.60708	0.208788	0.190828	0.833808	0.946247	1.51119	0.220686	0.295172	0.335962	0.54421	0.117843	0.249101	0.288519	0.362049	0.303794	49.5021	0.32621	0.0673758	0.190562	0.294865	224.935	2.30419
	132B	Hanover	Magdeburg	AComA	anterior	1	16.5779	21.8925	19.4793	15.0078	5.3046	5.82478	6.17088	15.0904	6.04635	1.09422	1.18147	5.51218	3.6265	7.6623	19.5092	4.54287	0.22157	0.218241	2.16357	3.64921	1.95866	0.319981	0.325911	0.198509	0.400676	0.0738526	0.304853	0.151104	0.165133	0.136067	80.9581	0.390526	0.0151878	0.0352596	0.0737202	323.417	3.48885
	133A	Hanover	Magdeburg	BA	posterior	1	6.04202	7.68973	6.52721	5.13048	2.0917	0.819995	0.984014	1.86073	0.906159	0.0579557	0.0784238	0.23867	2.96615	3.62857	11.9602	2.88169	0.086164	0.0845313	1.66512	2.09669	1.41391	0.346193	0.365643	0.242828	0.486992	0.260994	0.285331	0.354732	0.39054	0.28825	50.2803	0.329373	0.0693299	0.237293	0.306719	251.364	2.05193
	133B	Hanover	Magdeburg	AComA	anterior	0	3.10527	4.23597	3.32746	2.93475	1.35914	0.266508	0.3202	0.563711	0.310419	0.0143148	0.0157466	0.0397977	2.05355	2.60388	8.40496	2.08977	0.043911	0.0419967	1.19256	1.48594	1.12707	0.437687	0.271021	0.359688	0.550671	0.0909316	0.246914	0.545717	0.550704	0.25744	16.6383	0.247882	0.21565	0.40157	0.423159	80.1389	1.00725
	134A	Hanover	Magdeburg	MCA	MCA	1	6.29814	7.90907	6.9991	6.60432	1.8463	1.19149	1.32863	1.99106	1.30649	0.122946	0.133103	0.264181	3.5264	4.00766	13.4539	3.41908	0.115	0.110997	1.57153	1.84206	1.64793	0.293149	0.273596	0.465387	0.656178	0.0763055	0.246885	0.278938	0.321769	0.284554	28.0799	0.346123	0.058171	0.167537	0.29832	165.452	2.88184
	134B	Hanover	Magdeburg	MCA	MCA	0	3.06659	5.81462	3.67718	4.0001	0.845942	0.324451	0.433917	1.06226	0.405529	0.0191122	0.0227367	0.102948	2.48762	4.18106	11.7589	2.75802	0.081078	0.0816883	0.733448	1.11188	0.956719	0.275857	0.323409	0.18565	0.381762	0.159409	0.290065	0.471312	0.481677	0.296877	40.0444	0.252485	0.140587	0.353886	0.463583	199.146	1.25075
	135	Hanover	Magdeburg	ICA	ICA	0	2.4058	7.09659	4.21348	6.01402	0.102645	0.331736	0.541228	1.58216	0.515298	0.0230811	0.0281388	0.187132	3.37636	6.09362	16.8424	4.35953	0.183562	0.16159	0.394806	0.551848	0.986937	0.0426658	0.396162	0.123341	0.325693	0.179741	0.343908	0.392132	0.407275	0.307345	44.5134	0.228356	0.0994111	0.252167	0.443729	217.488	1.20043
	136A	Kiel	Magdeburg	MCA	MCA	0	1.10823	2.6282	1.50412	2.61698	0.125602	0.0750101	0.128568	0.226999	0.119722	0.00283874	0.00346341	0.0101698	2.05754	2.6282	8.48167	2.10864	0.0447119	0.0424713	0.421669	0.525567	0.995732	0.113335	0.357238	0.279135	0.527411	0.180364	0.316596	0.764229	0.76741	0.27475	3.14178	0.176998	0.593549	0.631514	0.377803	14.0769	0.419979
	136B	Kiel	Magdeburg	MCA	MCA	0	6.35154	6.80136	6.38532	4.17105	3.30743	0.722519	0.806045	1.47558	0.797038	0.057762	0.0602806	0.168545	2.8756	3.21008	9.8647	3.02164	0.074519	0.0724995	1.97862	2.10201	1.29936	0.520728	0.280402	0.34271	0.540154	0.0417803	0.267907	0.363649	0.363657	0.139463	24.6141	0.263448	0.0946413	0.133033	0.144285	56.2102	0.992125
	137	Kiel	Magdeburg	MCA	MCA	0	3.27395	5.60486	3.75378	5.14434	1.84568	0.487429	0.607845	0.986914	0.597372	0.0371665	0.041285	0.0921919	2.53373	4.79145	13.9578	3.15072	0.109943	0.0953493	0.68329	1.03911	1.07365	0.563749	0.284411	0.403143	0.605293	0.0997589	0.245702	0.419115	0.42544	0.218615	19.2266	0.262625	0.136518	0.223166	0.313986	75.2659	1.32804
	138	Kiel	Magdeburg	MCA	MCA	0	4.03303	6.08458	4.18808	5.09717	1.0129	0.565532	0.707299	1.16395	0.692673	0.0460685	0.0513037	0.118079	3.36733	4.43721	14.1806	3.58634	0.127141	0.117351	0.908912	1.12455	1.14873	0.251152	0.287888	0.39015	0.595108	0.102044	0.250732	0.377775	0.403273	0.274158	22.7329	0.279334	0.113192	0.231541	0.332926	114.462	1.58252
	139	Kiel	Magdeburg	MCA	MCA	0	6.25937	10.0657	6.86822	9.69957	2.97758	1.97247	2.36961	3.22668	2.33786	0.29075	0.32334	0.545013	4.74688	9.60767	24.9394	5.86045	0.36539	0.358192	0.651498	1.06807	1.00957	0.475699	0.279443	0.533473	0.724541	0.100793	0.236919	0.207004	0.264315	0.252125	33.9353	0.364588	0.0307126	0.11639	0.251617	198.855	3.9788
	140	Kiel	Magdeburg	MCA	MCA	0	10.5134	11.5652	10.8686	9.06617	5.11499	2.69366	2.80638	4.20577	2.80059	0.416514	0.423627	0.811038	2.82824	4.46252	12.9381	3.30591	0.10693	0.0991258	2.35593	3.18018	2.03163	0.486523	0.235618	0.513556	0.665893	0.0167927	0.228534	0.206833	0.222858	0.159499	28.9276	0.341128	0.0394166	0.0651559	0.142764	118.067	3.17471
	141	Kiel	Magdeburg	MCA	MCA	0	8.47089	10.0026	8.86128	9.69531	3.5551	2.15056	2.31018	3.14325	2.29504	0.306234	0.315308	0.524012	3.43212	4.9797	14.5188	3.98049	0.14448	0.134232	1.70108	2.1281	1.94697	0.419684	0.240165	0.584403	0.73015	0.0287781	0.230306	0.211426	0.255981	0.243827	28.0243	0.376618	0.0312601	0.105274	0.236178	163.323	4.07711
	142	Kiel	Magdeburg	MCA	MCA	0	6.00757	6.94812	6.21022	4.66866	2.27915	0.765686	0.840131	1.51669	0.824915	0.0614993	0.0662838	0.175638	2.48209	3.06047	9.08188	2.60867	0.059229	0.0596618	1.96296	2.30293	1.52547	0.379379	0.275044	0.350149	0.543893	0.072182	0.251718	0.353861	0.380736	0.243338	32.2716	0.299043	0.0845743	0.197317	0.259108	138.15	1.66076
	143	Kiel	Magdeburg	MCA	MCA	0	5.18353	8.09782	6.48145	7.26839	3.58446	1.03269	1.16787	2.06418	1.14434	0.0927646	0.107617	0.278866	2.82875	4.29784	13.2302	3.37561	0.11165	0.095485	1.20608	1.53558	1.69117	0.69151	0.312657	0.332649	0.55438	0.13801	0.256411	0.33137	0.384587	0.313217	55.8705	0.368734	0.0817139	0.233756	0.360029	283.973	3.03392
	144	Kiel	Magdeburg	MCA	MCA	0	10.4206	15.9233	12.7359	11.6389	3.65253	3.31932	3.92208	7.96606	3.71089	0.510777	0.639461	2.11417	4.95653	9.39512	25.9682	6.03154	0.39157	0.365738	1.10915	1.72768	1.23883	0.350512	0.339078	0.241597	0.465838	0.201238	0.273615	0.188556	0.241274	0.244837	92.0999	0.448036	0.0195881	0.0981175	0.16652	521.985	4.42883
	145	Kiel	Magdeburg	MCA	MCA	0	8.72001	9.21965	8.72778	6.52461	5.97006	1.32529	1.48853	2.72888	1.42352	0.126949	0.147921	0.423888	3.12121	3.94773	11.9263	3.29458	0.09823	0.0967744	2.20887	2.64678	1.65275	0.684639	0.318923	0.299487	0.521649	0.141779	0.278777	0.283744	0.308315	0.213116	43.6751	0.325094	0.0431444	0.133776	0.208266	190.504	2.24307
	146A	Kiel	Magdeburg	MCA	MCA	0	6.24185	8.94659	7.04933	8.89143	2.46942	1.60582	1.82848	2.59473	1.81391	0.207912	0.221019	0.393017	3.80323	6.05347	18.1637	4.58254	0.20809	0.18082	1.03112	1.36209	1.46882	0.395624	0.257361	0.529015	0.699076	0.0593049	0.232631	0.244199	0.276282	0.226517	25.5435	0.335883	0.0512116	0.10777	0.209342	122.525	2.754
	146B	Kiel	Magdeburg	ACA	anterior	0	2.01224	3.40961	2.52863	3.31907	1.1964	0.188084	0.222299	0.369316	0.217499	0.00809972	0.008859	0.0211043	1.78183	2.15776	6.54052	1.79894	0.029415	0.0301968	0.932558	1.11857	1.5382	0.59456	0.288246	0.383795	0.588924	0.0857069	0.260747	0.685242	0.70305	0.413365	20.5259	0.276185	0.370035	0.688707	0.78858	102.406	1.30377
	147A	Kiel	Magdeburg	MCA	MCA	0	5.57975	6.97678	5.75897	5.44905	1.55616	0.777172	0.933822	1.53017	0.903251	0.0660548	0.0765984	0.177984	3.34511	4.51997	13.4396	3.75246	0.126079	0.118751	1.23447	1.48696	1.20555	0.278895	0.305612	0.371127	0.590296	0.137648	0.25865	0.331451	0.386759	0.315158	34.9598	0.320858	0.0755205	0.237161	0.340151	188.784	2.1549
	147B	Kiel	Magdeburg	MCA	MCA	0	0.684111	1.62734	0.899662	1.54012	0.309619	0.0314949	0.0496249	0.0899457	0.0470608	0.000717378	0.000881181	0.00253656	1.24932	1.62734	4.93066	1.26278	0.0155659	0.0159677	0.420387	0.541748	0.946405	0.452585	0.346398	0.282816	0.523213	0.18589	0.289085	1.24471	1.24592	0.507029	5.40885	0.189808	1.45608	1.7713	1.52134	26.7832	0.527787
	147C	Kiel	Magdeburg	MCA	MCA	0	0.572612	1.57053	0.84586	1.51098	0.123577	0.0259101	0.0440999	0.0796793	0.0414471	0.000549512	0.000706368	0.00211491	1.17124	1.57053	5.21845	1.19093	0.015537	0.0144472	0.364598	0.480812	0.96208	0.215812	0.378705	0.259827	0.520174	0.222061	0.309669	1.29048	1.29048	0.435847	2.75885	0.174474	1.61717	1.79163	1.22568	13.6015	0.418385
	147D	Kiel	Magdeburg	ACA	anterior	0	3.65079	4.67018	3.82885	3.71501	0.861514	0.373919	0.44184	0.7067	0.432783	0.0225801	0.0249864	0.0558633	2.55031	2.82787	9.04875	2.60208	0.058864	0.0566424	1.291	1.40303	1.31371	0.23598	0.291476	0.404203	0.6124	0.0963035	0.257532	0.497789	0.519802	0.37743	23.268	0.303982	0.196607	0.379891	0.577311	113.641	1.8147
	147E	Kiel	Magdeburg	AComA	anterior	0	1.2135	2.49516	1.47195	2.18018	0.087182	0.0720216	0.103259	0.195772	0.0998741	0.00219788	0.00266286	0.00814515	1.61431	2.23203	6.52904	1.70638	0.0278525	0.0282993	0.543675	0.711156	0.976771	0.0718434	0.350334	0.269839	0.510156	0.174619	0.285868	0.960435	0.978152	0.553622	22.089	0.236748	0.888474	1.29697	1.23618	102.055	0.872499
	147F	Kiel	Magdeburg	AComA	anterior	0	1.38424	2.44931	1.45714	2.32463	0.0462596	0.086394	0.130601	0.19416	0.124686	0.00326569	0.00380815	0.00804479	2.02435	2.32816	7.8288	1.95647	0.038292	0.037016	0.594564	0.70752	0.998484	0.0334187	0.3224	0.405939	0.642181	0.142447	0.283301	0.778392	0.793126	0.359223	-1.41348	0.20052	0.561255	0.7415	0.665824	14.5675	0.598693
	148	Kiel	Magdeburg	MCA	MCA	0	4.65028	9.599	6.03962	9.23954	1.9543	1.22539	1.4778	2.89469	1.46509	0.128365	0.151714	0.463102	3.75221	6.0828	20.2024	4.74597	0.2397	0.179259	0.764497	0.979837	1.51896	0.420254	0.333334	0.277186	0.50613	0.153899	0.261174	0.2735	0.371095	0.370452	78.1069	0.405634	0.0584023	0.22921	0.370654	427.99	3.65899
	149	Kiel	Magdeburg	MCA	MCA	0	6.48921	7.99773	6.64423	5.91303	3.66	1.01861	1.18281	2.07173	1.14823	0.0997795	0.109655	0.280398	3.30732	5.19849	14.592	3.55318	0.12962	0.135034	1.24829	1.82631	1.13745	0.564013	0.280872	0.35585	0.554236	0.0900587	0.256562	0.285989	0.319571	0.265041	29.7564	0.313162	0.0499591	0.156506	0.272573	158.021	2.24624
	150	Kiel	Magdeburg	MCA	MCA	0	4.96212	7.32811	5.84776	5.77297	2.07032	0.814272	0.904683	1.68707	0.88734	0.0664694	0.0735938	0.206051	2.33695	3.92128	10.7212	2.72612	0.073068	0.0719727	1.26543	1.82021	1.47222	0.417225	0.290207	0.322587	0.525964	0.0968065	0.254916	0.339264	0.414319	0.32563	51.8088	0.337678	0.0731521	0.247707	0.369989	232.553	2.44385
	151	Kiel	Magdeburg	MCA	MCA	0	3.96234	6.48586	5.07212	6.31199	0.84565	0.638672	0.755331	1.33411	0.749629	0.0520372	0.0542644	0.144898	3.25257	4.28806	12.3091	3.6057	0.110957	0.109541	0.92404	1.09891	1.47199	0.213422	0.28632	0.359129	0.561893	0.0410434	0.271639	0.359904	0.395377	0.282026	28.8258	0.290787	0.104047	0.215803	0.309638	129.108	1.66017
	152	Magdeburg	Magdeburg	MCA	MCA	0	5.86564	7.72182	6.05421	7.58028	2.35656	1.14678	1.29602	1.90953	1.27019	0.116996	0.130092	0.248121	3.44329	4.42703	13.7086	3.60096	0.12341	0.119723	1.32496	1.62891	1.71227	0.401757	0.277143	0.471527	0.665184	0.100666	0.239623	0.288436	0.349095	0.307793	36.0824	0.359466	0.0606232	0.192479	0.310875	192.483	2.89042
	153	Magdeburg	Magdeburg	ACA	anterior	1	3.59389	4.78411	3.86935	4.10189	1.29148	0.328982	0.390046	0.719192	0.383103	0.0189285	0.0203853	0.057351	2.337	2.97693	8.84154	2.44849	0.054121	0.0546408	1.20725	1.4678	1.37789	0.359355	0.288399	0.330047	0.532686	0.0714609	0.265651	0.512638	0.566397	0.433803	35.4998	0.306518	0.218192	0.438407	0.680755	150.907	1.87149
	154	Magdeburg	Magdeburg	PComA	posterior	1	9.94133	15.6034	11.4964	14.3411	7.00315	4.02444	4.63847	7.67474	4.56903	0.809463	0.874837	1.99926	5.50362	11.2716	31.1393	6.99554	0.54459	0.48722	0.881977	1.4211	1.27232	0.704448	0.27035	0.404881	0.595333	0.0747275	0.243078	0.157583	0.201035	0.236621	57.108	0.453845	0.011276	0.0907887	0.498696	454.48	15.975
	155A	Magdeburg	Magdeburg	AComA	anterior	1	2.54344	5.64695	3.27412	5.30559	0.0260703	0.354601	0.465641	1.00256	0.451152	0.0209314	0.0252915	0.0943931	2.22948	5.28384	13.469	2.86735	0.096551	0.0925215	0.481363	0.887035	1.00412	0.01025	0.353826	0.221747	0.449999	0.172396	0.289759	0.503315	0.572318	0.377222	61.6545	0.298058	0.184398	0.483202	0.552617	285.505	1.64391
	155B	Magdeburg	Magdeburg	AComA	anterior	0	3.58869	4.72435	3.69616	4.16004	1.8146	0.428593	0.51768	0.70741	0.510307	0.0303574	0.0327369	0.0559475	2.80743	3.6468	10.9969	2.97227	0.081714	0.0804102	0.984066	1.20739	1.14074	0.505645	0.268043	0.542605	0.721374	0.0726855	0.24124	0.426654	0.449698	0.24321	6.69694	0.255851	0.149638	0.274201	0.308734	54.3584	1.17014
	155C	Magdeburg	Magdeburg	MCA	MCA	0	5.12038	6.94333	5.84406	5.84135	1.20929	0.656611	0.806692	1.55978	0.764351	0.0493803	0.0584321	0.183177	3.30949	4.29713	13.0937	3.29135	0.10774	0.111694	1.19158	1.5557	1.35936	0.236172	0.324098	0.269578	0.490037	0.154912	0.283525	0.359566	0.423497	0.362821	49.2031	0.329385	0.0829348	0.279322	0.446947	246.705	2.37523
	156A	Magdeburg	Magdeburg	ICA	ICA	0	7.04837	11.3313	8.47251	9.3365	2.04982	1.71089	1.95693	4.0351	1.93765	0.218157	0.229895	0.762175	4.69363	6.01966	17.9456	5.0544	0.22676	0.221907	1.17089	1.3945	1.551	0.290822	0.282132	0.286229	0.480199	0.0510572	0.263932	0.221538	0.269856	0.257316	52.9164	0.353425	0.0412223	0.0900341	0.158422	189.102	2.22871
	156B	Magdeburg	Magdeburg	ICA	ICA	0	1.21365	3.40487	1.78793	3.1244	0.171419	0.120721	0.194565	0.36919	0.18938	0.00521283	0.00635642	0.0210935	2.55004	3.22228	9.78665	2.80623	0.068659	0.0645357	0.376642	0.432482	0.969626	0.141243	0.390665	0.24713	0.512961	0.179911	0.323058	0.548392	0.676657	0.575704	15.9814	0.219835	0.294784	0.543223	0.733826	59.5946	0.759715
	156C	Magdeburg	Magdeburg	ICA	ICA	0	1.76463	3.37528	1.96971	3.35638	0.116685	0.146208	0.220645	0.376584	0.215286	0.00688301	0.00790594	0.0217303	2.53911	3.3568	10.0188	2.75792	0.069078	0.0669417	0.525687	0.639839	0.999875	0.0661242	0.354875	0.316747	0.571681	0.129388	0.309629	0.552601	0.61496	0.429986	6.45658	0.213053	0.291234	0.469433	0.60947	40.6777	0.785911
	156D	Magdeburg	Magdeburg	ICA	ICA	0	2.03696	2.67372	2.0991	2.42672	0.124967	0.118803	0.163606	0.25122	0.159932	0.00499752	0.00551889	0.0118401	1.79154	2.44366	7.65325	2.14962	0.041129	0.0343841	0.833572	0.947591	0.993071	0.0613497	0.298477	0.422083	0.63662	0.0944709	0.267328	0.684605	0.717394	0.438103	1.43329	0.222935	0.382528	0.619174	0.768941	23.782	0.811943
	157	Magdeburg	Magdeburg	VA	posterior	1	5.19398	6.65086	5.67807	4.72726	3.07451	0.641776	0.715721	1.39702	0.705157	0.0487038	0.0511469	0.155266	2.58218	3.1079	9.39182	2.69941	0.063381	0.0630295	1.67122	1.92411	1.52105	0.591937	0.274066	0.313679	0.504758	0.0477668	0.261058	0.384529	0.393617	0.223784	31.241	0.28363	0.101245	0.196598	0.274724	118.561	1.49529
	158	Magdeburg	Magdeburg	AChA	ICA	0	3.24762	4.55739	3.45178	4.55147	1.43799	0.387712	0.466235	0.671917	0.456999	0.0253292	0.0274604	0.0517902	2.79137	3.23038	9.82643	2.82043	0.069287	0.0708208	1.00534	1.15146	1.40896	0.442782	0.275609	0.489073	0.680142	0.0776119	0.250668	0.443281	0.501025	0.362778	15.8543	0.283826	0.147552	0.372085	0.509907	98.9518	1.63777
	159	Magdeburg	Magdeburg	MCA	MCA	0	5.64544	6.24096	5.71091	6.0207	2.02351	0.836869	0.928272	1.27288	0.922466	0.0732268	0.0780934	0.135038	3.08555	3.61383	10.669	3.20919	0.085597	0.0875769	1.56218	1.75915	1.66602	0.358433	0.271711	0.542269	0.724707	0.0623171	0.244545	0.329656	0.415555	0.481215	32.2565	0.424632	-0.0346875	0.396288	3.32603	301.41	22.1512
	160A	Magdeburg	Magdeburg	AChA	ICA	1	2.98847	4.20013	3.0544	3.43131	0.179666	0.272731	0.358181	0.574164	0.350076	0.0158476	0.0177923	0.0409098	2.96832	3.43136	10.3379	2.99269	0.077345	0.0799958	0.870927	0.998589	0.999985	0.0601199	0.308243	0.387379	0.609714	0.109302	0.269657	0.463073	0.51742	0.363861	10.6003	0.244747	0.156301	0.393597	0.477343	79.8366	1.09011
	160B	Magdeburg	Magdeburg	ICA	ICA	0	2.84168	4.27685	3.07096	4.01084	1.3791	0.341465	0.433048	0.576471	0.427237	0.0234228	0.0251029	0.0411566	2.99572	3.43879	10.693	3.20854	0.085772	0.080909	0.82636	0.885662	1.16635	0.485312	0.264532	0.569112	0.741125	0.0669298	0.240105	0.438955	0.473857	0.329504	1.49192	0.255229	0.154652	0.348868	0.438627	60.04	1.2638
	161A	Magdeburg	Magdeburg	ICA	ICA	1	5.68397	7.78945	6.37139	6.02589	2.15066	0.81857	0.987215	1.90618	0.931539	0.0599004	0.0799798	0.247468	3.39018	4.30307	13.3301	3.38988	0.112969	0.114575	1.32091	1.67675	1.40037	0.378373	0.369198	0.242053	0.488695	0.251056	0.278257	0.357608	0.442829	0.394435	72.4695	0.383324	0.0911752	0.325112	0.686044	393.159	4.50815
	161B	Magdeburg	Magdeburg	ICA	ICA	0	2.08916	2.77937	2.12313	2.32304	0.57262	0.136913	0.17199	0.242685	0.170881	0.00597556	0.00613713	0.0112419	1.97967	2.18258	6.66657	2.03811	0.033968	0.0339353	0.957198	1.02505	1.06436	0.274091	0.260339	0.531545	0.704126	0.0263265	0.25192	0.716875	0.717378	0.244192	-0.306895	0.222995	0.458747	0.547855	0.438591	5.80324	0.691489
	161C	Magdeburg	Magdeburg	PICA	posterior	0	2.4967	3.58996	2.77687	3.41428	1.57976	0.240195	0.286099	0.407763	0.277677	0.0117768	0.0132622	0.0244842	1.85984	2.59951	7.73066	1.9394	0.037482	0.0379714	0.96045	1.28736	1.31343	0.63274	0.284485	0.480996	0.680976	0.112001	0.248318	0.603342	0.630713	0.385747	13.6137	0.279291	0.314615	0.503246	0.598266	63.297	1.29201
	162	Magdeburg	Magdeburg	AChA	ICA	1	4.81065	6.95735	6.07913	6.47077	2.90709	0.713059	0.779686	1.52377	0.750163	0.0483349	0.0572991	0.176869	1.77063	2.52012	7.34854	2.01967	0.037104	0.035046	1.9089	2.38191	2.56764	0.604303	0.321069	0.273281	0.492308	0.156446	0.268322	0.404326	0.436157	0.293971	51.8789	0.33592	0.0920671	0.239889	0.338964	190.884	1.99308
	163	Magdeburg	Magdeburg	ICA	ICA	0	4.98069	5.78422	5.1448	4.26865	1.73314	0.498369	0.559904	1.05111	0.547264	0.0301707	0.0335927	0.101332	2.1423	2.83386	8.4803	2.30629	0.048895	0.0476813	1.75757	2.15961	1.50631	0.347972	0.320273	0.29774	0.520652	0.101868	0.286286	0.439232	0.492375	0.408269	42.4019	0.336885	0.126098	0.339644	0.542463	184.095	2.20871
	164	Magdeburg	Magdeburg	MCA	MCA	0	3.81721	5.79503	4.76971	4.65153	1.9611	0.400941	0.529795	1.06828	0.475976	0.0205332	0.0304079	0.103826	2.52502	3.92723	10.7842	2.78316	0.075035	0.0778826	0.971985	1.37154	1.18443	0.513751	0.395318	0.197766	0.445552	0.324741	0.294186	0.523824	0.551805	0.458428	60.8881	0.350751	0.110793	0.580925	0.851576	393.852	2.73992
	165A	Magdeburg	Magdeburg	MCA	MCA	0	3.41908	5.33287	3.78573	4.83479	0.986041	0.424205	0.506603	0.893454	0.497877	0.0276978	0.0307471	0.0794113	2.55241	3.42602	10.6142	2.77636	0.073672	0.0686802	0.997973	1.2315	1.4112	0.288394	0.294253	0.34879	0.55725	0.099173	0.256394	0.453244	0.518423	0.408626	38.2343	0.31629	0.150031	0.40125	0.66251	185.284	2.29307
	165B	Magdeburg	Magdeburg	PComA	posterior	0	5.5332	7.60702	6.50022	4.45728	3.69085	0.722769	0.793006	1.81794	0.772717	0.053494	0.0578418	0.230484	2.39097	2.80991	8.62484	2.31647	0.049948	0.0527662	1.96917	2.38863	1.58627	0.667038	0.294781	0.232094	0.425052	0.0751668	0.276077	0.374292	0.417937	0.324085	58.9627	0.334953	0.0725755	0.281843	0.489811	307.733	2.84796
	165C	Magdeburg	Magdeburg	BA	posterior	0	2.85631	4.09548	3.01851	3.57772	1.04304	0.276219	0.373648	0.556408	0.364315	0.0169499	0.0188649	0.0390269	3.0672	3.60088	11.5008	3.06399	0.088096	0.0867442	0.793225	0.932217	0.993568	0.365171	0.304801	0.434315	0.654763	0.101507	0.272029	0.483053	0.529476	0.450367	11.4135	0.276214	0.193617	0.421432	0.744877	86.5996	1.69171
	165D	Magdeburg	Magdeburg	SCA	posterior	1	4.59451	5.90035	5.50934	4.21763	3.21481	0.544777	0.569863	1.0975	0.556978	0.0306715	0.0355548	0.108114	0.981323	1.59107	4.41394	1.10568	0.012201	0.0122628	2.88769	4.15538	2.65082	0.699707	0.324758	0.283696	0.507496	0.137345	0.271714	0.472991	0.609169	0.622654	80.0262	0.459271	0.129656	0.59051	1.244	415.731	5.42222
	166	Magdeburg	Magdeburg	ICA	ICA	0	3.63818	5.57375	3.94858	5.00506	1.53221	0.505423	0.630286	0.976542	0.623613	0.0411603	0.0430507	0.0907424	3.44758	4.29253	13.1087	3.60646	0.11819	0.11623	0.847561	1.0088	1.16599	0.421147	0.266256	0.453595	0.638593	0.0439123	0.251962	0.377045	0.409122	0.258193	14.0496	0.25853	0.115072	0.203037	0.30261	57.7812	1.30214
	167	Magdeburg	Magdeburg	ICA	ICA	0	3.48088	5.05326	3.73531	4.45476	1.5327	0.3984	0.46086	0.802742	0.453876	0.0251376	0.0268302	0.0676298	2.18759	3.20505	9.35527	2.37197	0.055476	0.0550669	1.08606	1.46751	1.38992	0.440321	0.274308	0.371694	0.565407	0.0630878	0.253572	0.47456	0.497643	0.28061	25.7769	0.276918	0.204682	0.274478	0.301356	75.3373	1.15495
	168	Magdeburg	Magdeburg	ICA	ICA	0	6.0606	9.07508	6.19344	9.06759	2.56403	1.53195	1.75252	2.80238	1.73069	0.190673	0.203501	0.441128	4.66923	5.37478	16.7447	4.74753	0.19874	0.197104	1.1276	1.27658	1.68706	0.423065	0.265294	0.432239	0.617578	0.0630358	0.242258	0.231049	0.296674	0.298504	40.0999	0.371793	0.0417485	0.13272	0.26037	195.973	3.21469
	169	Magdeburg	Magdeburg	ICA	ICA	0	7.14174	7.74755	7.23245	7.45253	3.97976	1.30599	1.39516	1.96301	1.37842	0.138769	0.145472	0.258618	2.8151	3.18408	10.0271	2.88937	0.07243	0.070399	2.24295	2.47173	2.34056	0.557253	0.253629	0.53658	0.702195	0.0460726	0.239028	0.274325	0.297155	0.220914	17.4464	0.320309	0.0501183	0.128572	0.218197	100.845	2.32671
	170	Magdeburg	Magdeburg	ICA	ICA	0	5.55663	7.20338	5.79907	5.43998	1.85216	0.825556	0.956783	1.63061	0.925434	0.0700253	0.0787285	0.195793	3.41191	3.90313	11.6864	3.4186	0.099878	0.104592	1.42364	1.62541	1.39375	0.333325	0.295363	0.357649	0.567539	0.110547	0.263088	0.329253	0.380426	0.315196	37.0376	0.329564	0.0686805	0.252827	0.384637	228.068	2.56686
	171	Magdeburg	Magdeburg	ICA	ICA	0	11.276	15.7202	12.3079	14.026	4.35217	4.47853	5.06271	7.78245	5.03583	0.97678	1.0143	2.04149	6.80075	10.5745	28.9746	7.69365	0.5573	0.564817	1.06634	1.46563	1.32639	0.385967	0.249644	0.478464	0.647075	0.0369898	0.234635	0.142152	0.170629	0.151699	34.2783	0.350106	0.0152245	0.0425744	0.100074	163.667	3.60756
	172A	Magdeburg	Magdeburg	AComA	anterior	1	3.2826	5.18611	4.05158	3.26724	1.79647	0.279522	0.347195	0.84528	0.321719	0.0123439	0.0158378	0.073076	1.98796	2.57747	7.81336	2.16025	0.042197	0.0402431	1.27357	1.51955	1.26762	0.547271	0.362768	0.168918	0.380606	0.220607	0.30279	0.600089	0.610925	0.414622	58.4468	0.306875	0.18099	0.614473	0.81823	313.327	1.86404
	172B	Magdeburg	Magdeburg	MCA	MCA	0	2.31905	5.388	2.93204	4.73875	0.772981	0.33503	0.420589	0.912165	0.407286	0.0180099	0.0217141	0.0819189	2.50735	3.3368	10.5109	2.74975	0.072256	0.0657106	0.694994	0.843368	1.42015	0.333317	0.352487	0.21985	0.446505	0.170592	0.289695	0.536205	0.594047	0.462183	60.049	0.326066	0.204125	0.577864	0.815737	319.459	2.24188
	173A	Magdeburg	Magdeburg	MCA	MCA	1	4.17591	6.48736	5.14823	5.92181	1.96484	0.654392	0.764701	1.33976	0.742487	0.0496483	0.0559897	0.145819	3.14127	3.4318	11.1779	3.15246	0.088095	0.0846677	1.21683	1.32465	1.72557	0.470519	0.30168	0.340478	0.554193	0.113261	0.265394	0.38057	0.424426	0.365782	38.5832	0.3398	0.106787	0.296207	0.507759	215.801	2.70199
	173B	Magdeburg	Magdeburg	ICA	ICA	0	3.18801	5.4462	3.83704	5.29748	1.53921	0.460575	0.54931	0.931982	0.537102	0.0313858	0.0343982	0.0846029	2.40928	3.7739	10.8521	2.82072	0.076527	0.0714113	0.844752	1.13021	1.40371	0.482813	0.28894	0.370978	0.576301	0.0875731	0.260939	0.404968	0.486133	0.371582	32.3896	0.296822	0.11021	0.312083	0.450232	131.456	1.69888
	174	Magdeburg	Magdeburg	ICA	ICA	0	3.71111	4.40613	3.84562	4.24308	1.22756	0.391461	0.444831	0.653165	0.439981	0.0246687	0.0259181	0.0496372	2.31553	2.78092	8.5725	2.26398	0.04852	0.0505743	1.33449	1.6392	1.52578	0.33078	0.260727	0.49698	0.673614	0.0482061	0.244302	0.473837	0.513146	0.294999	16.9897	0.277904	0.186498	0.333227	0.423959	73.202	1.44283
	175	Magdeburg	Magdeburg	MCA	MCA	0	4.15553	5.71381	4.68354	5.56229	1.81513	0.543749	0.612096	1.02566	0.58768	0.0335619	0.0403571	0.0976733	2.11332	2.55348	7.90892	2.22184	0.043931	0.0423827	1.6274	1.87031	2.17832	0.436799	0.320436	0.343613	0.57298	0.168378	0.262207	0.441915	0.511357	0.406718	46.0898	0.352425	0.0830718	0.446688	0.952752	264.583	4.1382
	176	Magdeburg	Magdeburg	AComA	anterior	0	3.39739	5.04681	4.19143	3.06989	1.61866	0.275625	0.31135	0.801162	0.289292	0.0118797	0.01384	0.0674301	1.01602	1.94882	4.92202	1.11068	0.013667	0.0155512	1.74331	3.05883	1.57526	0.476442	0.309217	0.176178	0.361091	0.141641	0.28936	0.650907	0.653428	0.285983	64.9883	0.297027	0.186731	0.56611	0.710615	260.92	1.61154
	177A	Magdeburg	Magdeburg	PComA	posterior	1	6.32182	7.75514	6.94061	4.72459	4.01306	0.823157	0.909431	1.89143	0.89278	0.0657574	0.0712578	0.244601	2.80096	3.11642	10.0513	2.7707	0.069623	0.0685572	2.02855	2.28167	1.51603	0.634795	0.299578	0.268836	0.472014	0.0771895	0.274575	0.35982	0.397436	0.269177	54.1905	0.324435	0.0888998	0.203152	0.299958	205.775	2.04934
	177B	Magdeburg	Magdeburg	BA	posterior	0	1.51636	2.90135	1.77772	2.66767	0.0188016	0.107101	0.158341	0.277733	0.15025	0.00430843	0.00505701	0.0137631	1.96395	2.68192	8.33696	2.07025	0.043149	0.0413682	0.565401	0.732454	0.994684	0.0123991	0.323597	0.313042	0.540987	0.148029	0.285816	0.680111	0.742293	0.47605	10.3531	0.216198	0.420771	0.637056	0.722182	40.7978	0.712354
	178	Magdeburg	Magdeburg	MCA	MCA	1	5.26911	6.66101	5.75285	4.65728	1.22652	0.645976	0.769023	1.3939	0.73836	0.0483908	0.0560264	0.154746	3.1866	3.55324	11.7719	3.13915	0.092384	0.0889288	1.4829	1.67852	1.31071	0.232775	0.309685	0.312711	0.529709	0.136287	0.269203	0.383252	0.478221	0.45124	59.2718	0.378653	0.098528	0.389564	0.684998	332.115	3.55747
