# Supplementary material for: Geometric uncertainty in intracranial aneurysm rupture status discrimination: a two-site retrospective study
Source: HighWire-hosted journal article supplement (doi:10.1136/bmjopen-2022-063051), 2022-11-01
Supplement: bmjopen-2022-063051supp002_data_supplement.xlsx [file bmjopen-2022-063051supp002_data_supplement.xlsx]

## Sheet: anterior region, site 1
Pearson's r	H	L_max	H_max	D_max	H_b	A	A_CH	A_MBS	A_closed	V	V_CH	V_MBS	D_neck,min	D_neck,max	P_neck	D_neck,equiv	A_neck	A_neck,elliptical	AR	eAR	BF	BL	NSI	AVSV	AASA	UI	EI	MAA	absMAA	MSD	HMC	MLN	GAA	absGAA	GSD	HGC	GLN
H	1	0.871817	0.967769	0.609708	0.836162	0.866747	0.829837	0.834931	0.826982	0.77906	0.777763	0.7695	0.219541	0.15276	0.0586159	0.159199	0.0885533	0.179031	0.867478	0.879144	0.701457	0.626912	0.172761	-0.392752	-0.455211	0.405396	0.011706	-0.661411	-0.691695	-0.503678	0.672145	0.726649	-0.627149	-0.646966	-0.547481	0.6175	0.613743
L_max	0.871817	1	0.950381	0.88421	0.647684	0.961822	0.960444	0.973113	0.95688	0.91703	0.9236	0.917901	0.401759	0.465501	0.375615	0.427639	0.392258	0.448154	0.582467	0.638679	0.727333	0.460742	0.275337	-0.49135	-0.557921	0.494365	0.0911443	-0.76334	-0.755084	-0.452636	0.801491	0.775498	-0.6932	-0.688458	-0.56663	0.782689	0.728852
H_max	0.967769	0.950381	1	0.72764	0.783366	0.922377	0.894232	0.91858	0.890154	0.841757	0.845719	0.856613	0.246358	0.248483	0.157592	0.224422	0.169966	0.240484	0.783699	0.819442	0.749235	0.580464	0.235326	-0.481223	-0.550833	0.463269	0.066883	-0.698252	-0.71076	-0.465245	0.776158	0.790177	-0.654621	-0.659292	-0.540918	0.727009	0.697506
D_max	0.609708	0.88421	0.72764	1	0.348756	0.872931	0.900229	0.863202	0.898747	0.868994	0.879966	0.822003	0.535109	0.641526	0.553782	0.609092	0.583359	0.629746	0.236365	0.303728	0.684334	0.273483	0.216061	-0.331171	-0.377624	0.437425	0.0133027	-0.726917	-0.700892	-0.370414	0.698121	0.705825	-0.63205	-0.626046	-0.507009	0.735312	0.730614
H_b	0.836162	0.647684	0.783366	0.348756	1	0.652951	0.605337	0.595624	0.605628	0.565273	0.548201	0.522412	0.124517	-0.0493704	-0.0751132	-0.0142859	-0.0635906	0.0277874	0.849394	0.80107	0.594718	0.883718	-0.0207713	-0.27479	-0.33652	0.136889	-0.0752483	-0.481265	-0.547372	-0.516801	0.434188	0.500018	-0.442702	-0.534303	-0.510758	0.321795	0.299973
A	0.866747	0.961822	0.922377	0.872931	0.652951	1	0.993461	0.967191	0.992438	0.979993	0.982331	0.933851	0.415069	0.425695	0.353004	0.417351	0.389643	0.450143	0.579455	0.607746	0.734516	0.464102	0.141931	-0.314759	-0.379836	0.364775	-0.0343127	-0.701803	-0.709786	-0.489074	0.706356	0.744677	-0.590411	-0.638943	-0.549582	0.710164	0.711344
A_CH	0.829837	0.960444	0.894232	0.900229	0.605337	0.993461	1	0.957314	0.9998	0.987817	0.987747	0.919103	0.484486	0.520435	0.453587	0.508224	0.491022	0.540633	0.503069	0.536368	0.681642	0.423228	0.129057	-0.286517	-0.349963	0.356437	-0.0503933	-0.739906	-0.747273	-0.512928	0.672241	0.703931	-0.621266	-0.671899	-0.584266	0.684671	0.681282
A_MBS	0.834931	0.973113	0.91858	0.863202	0.595624	0.967191	0.957314	1	0.9524	0.938718	0.952862	0.983868	0.345594	0.37537	0.289545	0.360727	0.320764	0.377115	0.568337	0.610131	0.752856	0.361668	0.333604	-0.50053	-0.557842	0.494126	0.166187	-0.63605	-0.626815	-0.378607	0.800855	0.753155	-0.54726	-0.551396	-0.452666	0.810887	0.747568
A_closed	0.826982	0.95688	0.890154	0.898747	0.605628	0.992438	0.9998	0.9524	1	0.988763	0.987526	0.913332	0.494397	0.526236	0.461812	0.516133	0.499745	0.549791	0.497945	0.529291	0.674954	0.426587	0.112532	-0.272671	-0.336815	0.340234	-0.064657	-0.742987	-0.751857	-0.521419	0.66113	0.696649	-0.621852	-0.677607	-0.591888	0.67234	0.671958
V	0.77906	0.91703	0.841757	0.868994	0.565273	0.979993	0.987817	0.938718	0.988763	1	0.997532	0.919599	0.486329	0.503462	0.456665	0.504059	0.503251	0.54327	0.454256	0.472821	0.643414	0.370343	0.0800273	-0.224647	-0.287506	0.272643	-0.0723518	-0.667265	-0.682787	-0.509737	0.603718	0.631382	-0.526875	-0.606629	-0.54487	0.626919	0.625782
V_CH	0.777763	0.9236	0.845719	0.879966	0.548201	0.982331	0.987747	0.952862	0.987526	0.997532	1	0.939826	0.459952	0.484875	0.430388	0.485458	0.477473	0.51693	0.458552	0.479574	0.668228	0.34772	0.131251	-0.261486	-0.320409	0.32125	-0.0315623	-0.653571	-0.661492	-0.473688	0.638752	0.657847	-0.519567	-0.58241	-0.514731	0.670121	0.664498
V_MBS	0.7695	0.917901	0.856613	0.822003	0.522412	0.933851	0.919103	0.983868	0.913332	0.919599	0.939826	1	0.298223	0.302144	0.223016	0.309966	0.262901	0.315936	0.527212	0.553325	0.743113	0.267709	0.361253	-0.485929	-0.534612	0.477272	0.208965	-0.529007	-0.516421	-0.310436	0.770407	0.707643	-0.432655	-0.439526	-0.359623	0.804915	0.737387
D_neck,min	0.219541	0.401759	0.246358	0.535109	0.124517	0.415069	0.484486	0.345594	0.494397	0.486329	0.459952	0.298223	1	0.68455	0.680516	0.907424	0.780459	0.908875	-0.126797	-0.207901	0.0427719	0.0866867	-0.19689	0.17895	0.160487	-0.151954	-0.22736	-0.581879	-0.646099	-0.62042	-0.0281649	-0.00889348	-0.44609	-0.65199	-0.694927	-0.0289781	-0.0384657
D_neck,max	0.15276	0.465501	0.248483	0.641526	-0.0493704	0.425695	0.520435	0.37537	0.526236	0.503462	0.484875	0.302144	0.68455	1	0.952452	0.870003	0.944362	0.908673	-0.328138	-0.214429	-0.0957382	-0.0608267	-0.0607252	0.0675526	0.0411929	0.134001	-0.193381	-0.679007	-0.663604	-0.395771	0.133322	0.126791	-0.584096	-0.603006	-0.549201	0.180393	0.158231
P_neck	0.0586159	0.375615	0.157592	0.553782	-0.0751132	0.353004	0.453587	0.289545	0.461812	0.456665	0.430388	0.223016	0.680516	0.952452	1	0.856719	0.973932	0.885721	-0.375338	-0.30448	-0.152912	-0.063931	-0.175988	0.160038	0.130344	-0.00751871	-0.26944	-0.647948	-0.636607	-0.402146	-0.0105931	-0.0135547	-0.542792	-0.580388	-0.54696	0.0376223	0.0242779
D_neck,equiv	0.159199	0.427639	0.224422	0.609092	-0.0142859	0.417351	0.508224	0.360727	0.516133	0.504059	0.485458	0.309966	0.907424	0.870003	0.856719	1	0.927437	0.953498	-0.267493	-0.298446	-0.0344753	-0.040316	-0.11268	0.141053	0.12911	0.0187125	-0.218991	-0.655725	-0.67798	-0.515914	0.0166592	0.0218172	-0.543274	-0.633932	-0.631179	0.0766784	0.0638458
A_neck	0.0885533	0.392258	0.169966	0.583359	-0.0635906	0.389643	0.491022	0.320764	0.499745	0.503251	0.477473	0.262901	0.780459	0.944362	0.973932	0.927437	1	0.948568	-0.352895	-0.317343	-0.119006	-0.0742943	-0.157221	0.175274	0.153223	-0.0213008	-0.242983	-0.622267	-0.632487	-0.460994	-0.0240164	-0.0279328	-0.499447	-0.575297	-0.56273	0.0332228	0.0220231
A_neck,elliptical	0.179031	0.448154	0.240484	0.629746	0.0277874	0.450143	0.540633	0.377115	0.549791	0.54327	0.51693	0.315936	0.908875	0.908673	0.885721	0.953498	0.948568	1	-0.265531	-0.246851	-0.0362745	0.00389744	-0.154833	0.161174	0.137546	-0.0469301	-0.226498	-0.63172	-0.66681	-0.553132	0.0295156	0.0350301	-0.494568	-0.634515	-0.640107	0.054727	0.04215
AR	0.867478	0.582467	0.783699	0.236365	0.849394	0.579455	0.503069	0.568337	0.497945	0.454256	0.458552	0.527212	-0.126797	-0.328138	-0.375338	-0.267493	-0.352895	-0.265531	1	0.946402	0.687447	0.67237	0.17501	-0.403492	-0.449883	0.319922	0.085204	-0.336823	-0.376912	-0.318802	0.535888	0.591404	-0.364862	-0.367504	-0.29579	0.448984	0.452528
eAR	0.879144	0.638679	0.819442	0.303728	0.80107	0.607746	0.536368	0.610131	0.529291	0.472821	0.479574	0.553325	-0.207901	-0.214429	-0.30448	-0.298446	-0.317343	-0.246851	0.946402	1	0.669211	0.627241	0.253039	-0.468335	-0.523547	0.427291	0.141463	-0.379364	-0.393057	-0.252402	0.648543	0.684775	-0.416549	-0.375007	-0.265041	0.560449	0.551084
BF	0.701457	0.727333	0.749235	0.684334	0.594718	0.734516	0.681642	0.752856	0.674954	0.643414	0.668228	0.743113	0.0427719	-0.0957382	-0.152912	-0.0344753	-0.119006	-0.0362745	0.687447	0.669211	1	0.525243	0.299888	-0.491048	-0.531507	0.442291	0.156555	-0.38428	-0.370737	-0.158456	0.76405	0.803671	-0.364742	-0.326593	-0.203252	0.753067	0.778659
BL	0.626912	0.460742	0.580464	0.273483	0.883718	0.464102	0.423228	0.361668	0.426587	0.370343	0.34772	0.267709	0.0866867	-0.0608267	-0.063931	-0.040316	-0.0742943	0.00389744	0.67237	0.627241	0.525243	1	-0.266998	-0.0753807	-0.147638	-0.0273992	-0.32451	-0.446319	-0.492382	-0.455777	0.317549	0.462862	-0.436396	-0.51301	-0.4877	0.186108	0.233546
NSI	0.172761	0.275337	0.235326	0.216061	-0.0207713	0.141931	0.129057	0.333604	0.112532	0.0800273	0.131251	0.361253	-0.19689	-0.0607252	-0.175988	-0.11268	-0.157221	-0.154833	0.17501	0.253039	0.299888	-0.266998	1	-0.82264	-0.751291	0.82444	0.921731	0.0439023	0.103361	0.369771	0.541539	0.314481	-0.0453028	0.182932	0.303322	0.601599	0.426888
AVSV	-0.392752	-0.49135	-0.481223	-0.331171	-0.27479	-0.314759	-0.286517	-0.50053	-0.272671	-0.224647	-0.261486	-0.485929	0.17895	0.0675526	0.160038	0.141053	0.175274	0.161174	-0.403492	-0.468335	-0.491048	-0.0753807	-0.82264	1	0.988477	-0.699218	-0.776156	0.120175	0.0703398	-0.205247	-0.736316	-0.487648	0.206644	0.0205209	-0.117912	-0.688543	-0.486975
AASA	-0.455211	-0.557921	-0.550833	-0.377624	-0.33652	-0.379836	-0.349963	-0.557842	-0.336815	-0.287506	-0.320409	-0.534612	0.160487	0.0411929	0.130344	0.12911	0.153223	0.137546	-0.449883	-0.523547	-0.531507	-0.147638	-0.751291	0.988477	1	-0.666761	-0.702072	0.17675	0.128624	-0.138293	-0.785145	-0.536059	0.253913	0.0880841	-0.0502508	-0.717967	-0.515553
UI	0.405396	0.494365	0.463269	0.437425	0.136889	0.364775	0.356437	0.494126	0.340234	0.272643	0.32125	0.477272	-0.151954	0.134001	-0.00751871	0.0187125	-0.0213008	-0.0469301	0.319922	0.427291	0.442291	-0.0273992	0.82444	-0.699218	-0.666761	1	0.555557	-0.296548	-0.202865	0.210502	0.706024	0.585943	-0.398765	-0.093785	0.0596992	0.777611	0.661296
EI	0.011706	0.0911443	0.066883	0.0133027	-0.0752483	-0.0343127	-0.0503933	0.166187	-0.064657	-0.0723518	-0.0315623	0.208965	-0.22736	-0.193381	-0.26944	-0.218991	-0.242983	-0.226498	0.085204	0.141463	0.156555	-0.32451	0.921731	-0.776156	-0.702072	0.555557	1	0.25734	0.272663	0.377195	0.341425	0.0749156	0.183998	0.31374	0.393229	0.366184	0.173434
MAA	-0.661411	-0.76334	-0.698252	-0.726917	-0.481265	-0.701803	-0.739906	-0.63605	-0.742987	-0.667265	-0.653571	-0.529007	-0.581879	-0.679007	-0.647948	-0.655725	-0.622267	-0.63172	-0.336823	-0.379364	-0.38428	-0.446319	0.0439023	0.120175	0.17675	-0.296548	0.25734	1	0.973506	0.558211	-0.423857	-0.51095	0.968401	0.932966	0.797608	-0.421756	-0.452247
absMAA	-0.691695	-0.755084	-0.71076	-0.700892	-0.547372	-0.709786	-0.747273	-0.626815	-0.751857	-0.682787	-0.661492	-0.516421	-0.646099	-0.663604	-0.636607	-0.67798	-0.632487	-0.66681	-0.376912	-0.393057	-0.370737	-0.492382	0.103361	0.0703398	0.128624	-0.202865	0.272663	0.973506	1	0.709129	-0.338625	-0.427345	0.923182	0.972862	0.879625	-0.319929	-0.345165
MSD	-0.503678	-0.452636	-0.465245	-0.370414	-0.516801	-0.489074	-0.512928	-0.378607	-0.521419	-0.509737	-0.473688	-0.310436	-0.62042	-0.395771	-0.402146	-0.515914	-0.460994	-0.553132	-0.318802	-0.252402	-0.158456	-0.455777	0.369771	-0.205247	-0.138293	0.210502	0.377195	0.558211	0.709129	1	0.03225	0.00886745	0.460362	0.764492	0.90379	0.0969458	0.122075
HMC	0.672145	0.801491	0.776158	0.698121	0.434188	0.706356	0.672241	0.800855	0.66113	0.603718	0.638752	0.770407	-0.0281649	0.133322	-0.0105931	0.0166592	-0.0240164	0.0295156	0.535888	0.648543	0.76405	0.317549	0.541539	-0.736316	-0.785145	0.706024	0.341425	-0.423857	-0.338625	0.03225	1	0.91177	-0.446283	-0.29017	-0.119318	0.960652	0.881146
MLN	0.726649	0.775498	0.790177	0.705825	0.500018	0.744677	0.703931	0.753155	0.696649	0.631382	0.657847	0.707643	-0.00889348	0.126791	-0.0135547	0.0218172	-0.0279328	0.0350301	0.591404	0.684775	0.803671	0.462862	0.314481	-0.487648	-0.536059	0.585943	0.0749156	-0.51095	-0.427345	0.00886745	0.91177	1	-0.518604	-0.372496	-0.166219	0.885672	0.940863
GAA	-0.627149	-0.6932	-0.654621	-0.63205	-0.442702	-0.590411	-0.621266	-0.54726	-0.621852	-0.526875	-0.519567	-0.432655	-0.44609	-0.584096	-0.542792	-0.543274	-0.499447	-0.494568	-0.364862	-0.416549	-0.364742	-0.436396	-0.0453028	0.206644	0.253913	-0.398765	0.183998	0.968401	0.923182	0.460362	-0.446283	-0.518604	1	0.887903	0.723689	-0.438203	-0.459066
absGAA	-0.646966	-0.688458	-0.659292	-0.626046	-0.534303	-0.638943	-0.671899	-0.551396	-0.677607	-0.606629	-0.58241	-0.439526	-0.65199	-0.603006	-0.580388	-0.633932	-0.575297	-0.634515	-0.367504	-0.375007	-0.326593	-0.51301	0.182932	0.0205209	0.0880841	-0.093785	0.31374	0.932966	0.972862	0.764492	-0.29017	-0.372496	0.887903	1	0.936503	-0.23104	-0.256419
GSD	-0.547481	-0.56663	-0.540918	-0.507009	-0.510758	-0.549582	-0.584266	-0.452666	-0.591888	-0.54487	-0.514731	-0.359623	-0.694927	-0.549201	-0.54696	-0.631179	-0.56273	-0.640107	-0.29579	-0.265041	-0.203252	-0.4877	0.303322	-0.117912	-0.0502508	0.0596992	0.393229	0.797608	0.879625	0.90379	-0.119318	-0.166219	0.723689	0.936503	1	-0.050986	-0.0339479
HGC	0.6175	0.782689	0.727009	0.735312	0.321795	0.710164	0.684671	0.810887	0.67234	0.626919	0.670121	0.804915	-0.0289781	0.180393	0.0376223	0.0766784	0.0332228	0.054727	0.448984	0.560449	0.753067	0.186108	0.601599	-0.688543	-0.717967	0.777611	0.366184	-0.421756	-0.319929	0.0969458	0.960652	0.885672	-0.438203	-0.23104	-0.050986	1	0.938855
GLN	0.613743	0.728852	0.697506	0.730614	0.299973	0.711344	0.681282	0.747568	0.671958	0.625782	0.664498	0.737387	-0.0384657	0.158231	0.0242779	0.0638458	0.0220231	0.04215	0.452528	0.551084	0.778659	0.233546	0.426888	-0.486975	-0.515553	0.661296	0.173434	-0.452247	-0.345165	0.122075	0.881146	0.940863	-0.459066	-0.256419	-0.0339479	0.938855	1

## Sheet: ICA, site 1
Pearson's r	H	L_max	H_max	D_max	H_b	A	A_CH	A_MBS	A_closed	V	V_CH	V_MBS	D_neck,min	D_neck,max	P_neck	D_neck,equiv	A_neck	A_neck,elliptical	AR	eAR	BF	BL	NSI	AVSV	AASA	UI	EI	MAA	absMAA	MSD	HMC	MLN	GAA	absGAA	GSD	HGC	GLN
H	1	0.930945	0.981924	0.881678	0.930418	0.870538	0.872152	0.883861	0.869462	0.777667	0.778782	0.795121	0.368918	0.622441	0.619909	0.421945	0.482358	0.42637	0.628304	0.873464	0.512603	0.411193	-0.235337	0.135397	0.0663265	0.0096626	-0.352749	-0.8123	-0.793563	-0.615894	0.614751	0.804283	-0.696775	-0.699374	-0.668287	0.605101	0.851513
L_max	0.930945	1	0.97609	0.984233	0.821628	0.913022	0.92507	0.952949	0.921964	0.825181	0.828232	0.860777	0.479923	0.803444	0.792548	0.572304	0.670343	0.60772	0.418265	0.754958	0.486809	0.291927	-0.0828721	0.00954319	-0.0422378	0.104321	-0.215498	-0.855544	-0.82036	-0.5798	0.734876	0.86988	-0.723545	-0.730034	-0.695895	0.720194	0.903087
H_max	0.981924	0.97609	1	0.937842	0.898535	0.896402	0.902188	0.92697	0.898915	0.805712	0.808434	0.836577	0.399255	0.699937	0.691705	0.473576	0.555809	0.493586	0.559441	0.850353	0.526205	0.379101	-0.146198	0.0407647	-0.0248558	0.0809104	-0.274574	-0.837581	-0.812204	-0.604878	0.702585	0.854828	-0.723164	-0.720195	-0.682046	0.691799	0.893097
D_max	0.881678	0.984233	0.937842	1	0.785282	0.923211	0.935306	0.954693	0.932687	0.842557	0.845365	0.871677	0.468577	0.81579	0.802158	0.572582	0.6849	0.619281	0.331533	0.691585	0.492272	0.265509	-0.0785222	0.0507181	0.0108394	0.0878882	-0.211283	-0.822144	-0.783937	-0.555409	0.714973	0.854386	-0.677977	-0.692421	-0.666594	0.709429	0.901387
H_b	0.930418	0.821628	0.898535	0.785282	1	0.768667	0.762349	0.772234	0.75918	0.671591	0.672626	0.686381	0.201325	0.419362	0.407342	0.227236	0.2865	0.248654	0.737453	0.901377	0.633376	0.657407	-0.303965	0.17631	0.0909965	-0.0246172	-0.413928	-0.695961	-0.689104	-0.592612	0.546918	0.731274	-0.609274	-0.593617	-0.573149	0.555428	0.787131
A	0.870538	0.913022	0.896402	0.923211	0.768667	1	0.998638	0.987502	0.998698	0.979886	0.98052	0.981423	0.237567	0.766586	0.725921	0.391901	0.552998	0.44914	0.274587	0.716037	0.329247	0.225637	-0.188234	0.21205	0.190933	-0.0440931	-0.290788	-0.655595	-0.629201	-0.492632	0.545221	0.74931	-0.490296	-0.522972	-0.527079	0.583479	0.868133
A_CH	0.872152	0.92507	0.902188	0.935306	0.762349	0.998638	1	0.991395	0.999933	0.974117	0.974807	0.978139	0.282532	0.795993	0.75861	0.436232	0.594634	0.493763	0.259542	0.700163	0.31766	0.212853	-0.17605	0.202401	0.181532	-0.0368783	-0.279125	-0.675958	-0.648714	-0.503068	0.556796	0.755535	-0.508469	-0.543138	-0.547569	0.588648	0.865647
A_MBS	0.883861	0.952949	0.92697	0.954693	0.772234	0.987502	0.991395	1	0.990377	0.95308	0.95515	0.972955	0.311801	0.806632	0.769108	0.458654	0.614048	0.519791	0.292195	0.722998	0.359907	0.224173	-0.111363	0.103453	0.0767663	0.0302166	-0.22466	-0.703754	-0.672974	-0.501597	0.628135	0.794011	-0.54607	-0.568813	-0.563346	0.655015	0.891832
A_closed	0.869462	0.921964	0.898915	0.932687	0.75918	0.998698	0.999933	0.990377	1	0.975713	0.976222	0.978769	0.280892	0.796544	0.758675	0.435606	0.594789	0.493569	0.254477	0.696493	0.311308	0.210305	-0.181179	0.207987	0.187229	-0.0460123	-0.281302	-0.672481	-0.645917	-0.502776	0.549251	0.750001	-0.5041	-0.540451	-0.545589	0.58079	0.861452
V	0.777667	0.825181	0.805712	0.842557	0.671591	0.979886	0.974117	0.95308	0.975713	1	0.999803	0.992255	0.121746	0.737844	0.679593	0.309745	0.494574	0.37428	0.160179	0.642167	0.208073	0.155932	-0.190028	0.236119	0.227928	-0.0954351	-0.26602	-0.531455	-0.510082	-0.417425	0.446152	0.649118	-0.36735	-0.40793	-0.426194	0.500341	0.792647
V_CH	0.778782	0.828232	0.808434	0.845365	0.672626	0.98052	0.974807	0.95515	0.976222	0.999803	1	0.993653	0.119856	0.737192	0.679119	0.307878	0.492898	0.372014	0.162803	0.645436	0.214552	0.157161	-0.178851	0.226812	0.219569	-0.0783659	-0.260933	-0.532682	-0.509359	-0.412491	0.458954	0.657931	-0.370083	-0.407393	-0.424814	0.514681	0.799476
V_MBS	0.795121	0.860777	0.836577	0.871677	0.686381	0.981423	0.978139	0.972955	0.978769	0.992255	0.993653	1	0.151881	0.758261	0.699594	0.335776	0.520262	0.404216	0.187019	0.6673	0.248308	0.168485	-0.128452	0.153604	0.142187	-0.0243957	-0.220947	-0.562234	-0.535417	-0.416949	0.522248	0.696992	-0.404222	-0.433326	-0.444022	0.575414	0.830141
D_neck,min	0.368918	0.479923	0.399255	0.468577	0.201325	0.237567	0.282532	0.311801	0.280892	0.121746	0.119856	0.151881	1	0.666042	0.744028	0.953506	0.843922	0.892034	-0.0754119	-0.0461067	-0.0665158	-0.145679	0.0671889	-0.0167611	-0.0263402	-0.00457306	0.0625799	-0.676135	-0.662651	-0.419081	0.2717	0.305223	-0.566804	-0.659479	-0.646248	0.152675	0.200195
D_neck,max	0.622441	0.803444	0.699937	0.81579	0.419362	0.766586	0.795993	0.806632	0.796544	0.737844	0.737192	0.758261	0.666042	1	0.98186	0.821716	0.929438	0.869307	-0.128236	0.284602	-0.0488762	-0.0772035	-0.0254342	0.0780037	0.0697857	-0.0517645	-0.0656811	-0.704679	-0.683316	-0.491247	0.459069	0.56108	-0.540118	-0.618681	-0.640157	0.417907	0.572582
P_neck	0.619909	0.792548	0.691705	0.802158	0.407342	0.725921	0.75861	0.769108	0.758675	0.679593	0.679119	0.699594	0.744028	0.98186	1	0.867271	0.951737	0.89261	-0.116129	0.252779	-0.0465561	-0.105907	-0.000522536	0.0784075	0.0780022	-0.01971	-0.0511006	-0.731945	-0.703438	-0.483218	0.47756	0.574371	-0.568421	-0.64763	-0.663017	0.422214	0.562229
D_neck,equiv	0.421945	0.572304	0.473576	0.572582	0.227236	0.391901	0.436232	0.458654	0.435606	0.309745	0.307878	0.335776	0.953506	0.821716	0.867271	1	0.938758	0.949372	-0.162617	-0.00992137	-0.131131	-0.184205	0.0449751	0.0107168	0.00482525	-0.0265351	0.0364777	-0.703315	-0.683452	-0.442874	0.305271	0.353527	-0.577386	-0.666444	-0.668754	0.199428	0.2747
A_neck	0.482358	0.670343	0.555809	0.6849	0.2865	0.552998	0.594634	0.614048	0.594789	0.494574	0.492898	0.520262	0.843922	0.929438	0.951737	0.938758	1	0.983445	-0.170706	0.0920452	-0.103864	-0.120793	0.00710848	0.0554312	0.0491658	-0.0566627	-0.0120853	-0.652222	-0.634314	-0.448553	0.378904	0.441588	-0.506971	-0.585761	-0.604954	0.291163	0.389452
A_neck,elliptical	0.42637	0.60772	0.493586	0.619281	0.248654	0.44914	0.493763	0.519791	0.493569	0.37428	0.372014	0.404216	0.892034	0.869307	0.89261	0.949372	0.983445	1	-0.157812	0.0358959	-0.0967722	-0.103025	0.0125205	0.0290691	0.0146066	-0.0720588	0.0115003	-0.630543	-0.622902	-0.451057	0.32737	0.374069	-0.496102	-0.579047	-0.594947	0.227216	0.307464
AR	0.628304	0.418265	0.559441	0.331533	0.737453	0.274587	0.259542	0.292195	0.254477	0.160179	0.162803	0.187019	-0.0754119	-0.128236	-0.116129	-0.162617	-0.170706	-0.157812	1	0.837611	0.77666	0.675512	-0.249829	-0.0169558	-0.130078	0.101653	-0.358094	-0.410624	-0.411303	-0.365633	0.424785	0.505775	-0.490624	-0.352836	-0.258887	0.407022	0.484031
eAR	0.873464	0.754958	0.850353	0.691585	0.901377	0.716037	0.700163	0.722998	0.696493	0.642167	0.645436	0.6673	-0.0461067	0.284602	0.252779	-0.00992137	0.0920452	0.0358959	0.837611	1	0.708014	0.60263	-0.248448	0.0410561	-0.0537563	0.0799633	-0.381146	-0.587521	-0.575496	-0.479822	0.606332	0.748334	-0.567981	-0.483966	-0.425554	0.630569	0.803521
BF	0.512603	0.486809	0.526205	0.492272	0.633376	0.329247	0.31766	0.359907	0.311308	0.208073	0.214552	0.248308	-0.0665158	-0.0488762	-0.0465561	-0.131131	-0.103864	-0.0967722	0.77666	0.708014	1	0.582116	-0.0462741	-0.162178	-0.246406	0.268792	-0.20765	-0.437606	-0.404592	-0.265794	0.616916	0.638411	-0.488548	-0.357507	-0.246905	0.618156	0.625765
BL	0.411193	0.291927	0.379101	0.265509	0.657407	0.225637	0.212853	0.224173	0.210305	0.155932	0.157161	0.168485	-0.145679	-0.0772035	-0.105907	-0.184205	-0.120793	-0.103025	0.675512	0.60263	0.582116	1	-0.45851	0.233771	0.109162	-0.114298	-0.550417	-0.221749	-0.229163	-0.31669	0.297156	0.388861	-0.272989	-0.187886	-0.161988	0.272623	0.339533
NSI	-0.235337	-0.0828721	-0.146198	-0.0785222	-0.303965	-0.188234	-0.17605	-0.111363	-0.181179	-0.190028	-0.178851	-0.128452	0.0671889	-0.0254342	-0.000522536	0.0449751	0.00710848	0.0125205	-0.249829	-0.248448	-0.0462741	-0.45851	1	-0.785473	-0.667556	0.77857	0.920387	0.0738539	0.127198	0.386268	0.262888	0.00430243	-0.0147521	0.138882	0.218592	0.331956	-0.010498
AVSV	0.135397	0.00954319	0.0407647	0.0507181	0.17631	0.21205	0.202401	0.103453	0.207987	0.236119	0.226812	0.153604	-0.0167611	0.0780037	0.0784075	0.0107168	0.0554312	0.0290691	-0.0169558	0.0410561	-0.162178	0.233771	-0.785473	1	0.979406	-0.648683	-0.742599	0.0224273	-0.0144139	-0.289488	-0.395638	-0.0975134	0.174387	-0.00425848	-0.128731	-0.38272	-0.0365749
AASA	0.0663265	-0.0422378	-0.0248558	0.0108394	0.0909965	0.190933	0.181532	0.0767663	0.187229	0.227928	0.219569	0.142187	-0.0263402	0.0697857	0.0780022	0.00482525	0.0491658	0.0146066	-0.130078	-0.0537563	-0.246406	0.109162	-0.667556	0.979406	1	-0.572018	-0.637169	0.086326	0.0645253	-0.180337	-0.428486	-0.137625	0.245949	0.0804632	-0.0463115	-0.390042	-0.0610326
UI	0.0096626	0.104321	0.0809104	0.0878882	-0.0246172	-0.0440931	-0.0368783	0.0302166	-0.0460123	-0.0954351	-0.0783659	-0.0243957	-0.00457306	-0.0517645	-0.01971	-0.0265351	-0.0566627	-0.0720588	0.101653	0.0799633	0.268792	-0.114298	0.77857	-0.648683	-0.572018	1	0.489609	-0.0686932	0.0434987	0.362828	0.601582	0.368458	-0.194091	0.0793347	0.156186	0.671643	0.276819
EI	-0.352749	-0.215498	-0.274574	-0.211283	-0.413928	-0.290788	-0.279125	-0.22466	-0.281302	-0.26602	-0.260933	-0.220947	0.0625799	-0.0656811	-0.0511006	0.0364777	-0.0120853	0.0115003	-0.358094	-0.381146	-0.20765	-0.550417	0.920387	-0.742599	-0.637169	0.489609	1	0.159896	0.149648	0.287247	-0.0244783	-0.260435	0.088419	0.139107	0.206602	0.0276528	-0.227736
MAA	-0.8123	-0.855544	-0.837581	-0.822144	-0.695961	-0.655595	-0.675958	-0.703754	-0.672481	-0.531455	-0.532682	-0.562234	-0.676135	-0.704679	-0.731945	-0.703315	-0.652222	-0.630543	-0.410624	-0.587521	-0.437606	-0.221749	0.0738539	0.0224273	0.086326	-0.0686932	0.159896	1	0.97375	0.66067	-0.599529	-0.716532	0.933742	0.936182	0.866944	-0.536916	-0.679901
absMAA	-0.793563	-0.82036	-0.812204	-0.783937	-0.689104	-0.629201	-0.648714	-0.672974	-0.645917	-0.510082	-0.509359	-0.535417	-0.662651	-0.683316	-0.703438	-0.683452	-0.634314	-0.622902	-0.411303	-0.575496	-0.404592	-0.229163	0.127198	-0.0144139	0.0645253	0.0434987	0.149648	0.97375	1	0.80025	-0.480413	-0.609348	0.904675	0.973065	0.917976	-0.42272	-0.603538
MSD	-0.615894	-0.5798	-0.604878	-0.555409	-0.592612	-0.492632	-0.503068	-0.501597	-0.502776	-0.417425	-0.412491	-0.416949	-0.419081	-0.491247	-0.483218	-0.442874	-0.448553	-0.451057	-0.365633	-0.479822	-0.265794	-0.31669	0.386268	-0.289488	-0.180337	0.362828	0.287247	0.66067	0.80025	1	-0.0960793	-0.250467	0.577998	0.798953	0.833372	-0.0696508	-0.32257
HMC	0.614751	0.734876	0.702585	0.714973	0.546918	0.545221	0.556796	0.628135	0.549251	0.446152	0.458954	0.522248	0.2717	0.459069	0.47756	0.305271	0.378904	0.32737	0.424785	0.606332	0.616916	0.297156	0.262888	-0.395638	-0.428486	0.601582	-0.0244783	-0.599529	-0.480413	-0.0960793	1	0.925214	-0.602589	-0.431972	-0.339841	0.969152	0.813185
MLN	0.804283	0.86988	0.854828	0.854386	0.731274	0.74931	0.755535	0.794011	0.750001	0.649118	0.657931	0.696992	0.305223	0.56108	0.574371	0.353527	0.441588	0.374069	0.505775	0.748334	0.638411	0.388861	0.00430243	-0.0975134	-0.137625	0.368458	-0.260435	-0.716532	-0.609348	-0.250467	0.925214	1	-0.656587	-0.536907	-0.45471	0.904282	0.938534
GAA	-0.696775	-0.723545	-0.723164	-0.677977	-0.609274	-0.490296	-0.508469	-0.54607	-0.5041	-0.36735	-0.370083	-0.404222	-0.566804	-0.540118	-0.568421	-0.577386	-0.506971	-0.496102	-0.490624	-0.567981	-0.488548	-0.272989	-0.0147521	0.174387	0.245949	-0.194091	0.088419	0.933742	0.904675	0.577998	-0.602589	-0.656587	1	0.866238	0.735369	-0.536597	-0.58703
absGAA	-0.699374	-0.730034	-0.720195	-0.692421	-0.593617	-0.522972	-0.543138	-0.568813	-0.540451	-0.40793	-0.407393	-0.433326	-0.659479	-0.618681	-0.64763	-0.666444	-0.585761	-0.579047	-0.352836	-0.483966	-0.357507	-0.187886	0.138882	-0.00425848	0.0804632	0.0793347	0.139107	0.936182	0.973065	0.798953	-0.431972	-0.536907	0.866238	1	0.953343	-0.353409	-0.503647
GSD	-0.668287	-0.695895	-0.682046	-0.666594	-0.573149	-0.527079	-0.547569	-0.563346	-0.545589	-0.426194	-0.424814	-0.444022	-0.646248	-0.640157	-0.663017	-0.668754	-0.604954	-0.594947	-0.258887	-0.425554	-0.246905	-0.161988	0.218592	-0.128731	-0.0463115	0.156186	0.206602	0.866944	0.917976	0.833372	-0.339841	-0.45471	0.735369	0.953343	1	-0.274205	-0.43188
HGC	0.605101	0.720194	0.691799	0.709429	0.555428	0.583479	0.588648	0.655015	0.58079	0.500341	0.514681	0.575414	0.152675	0.417907	0.422214	0.199428	0.291163	0.227216	0.407022	0.630569	0.618156	0.272623	0.331956	-0.38272	-0.390042	0.671643	0.0276528	-0.536916	-0.42272	-0.0696508	0.969152	0.904282	-0.536597	-0.353409	-0.274205	1	0.850955
GLN	0.851513	0.903087	0.893097	0.901387	0.787131	0.868133	0.865647	0.891832	0.861452	0.792647	0.799476	0.830141	0.200195	0.572582	0.562229	0.2747	0.389452	0.307464	0.484031	0.803521	0.625765	0.339533	-0.010498	-0.0365749	-0.0610326	0.276819	-0.227736	-0.679901	-0.603538	-0.32257	0.813185	0.938534	-0.58703	-0.503647	-0.43188	0.850955	1

## Sheet: MCA, site 1
Pearson's r	H	L_max	H_max	D_max	H_b	A	A_CH	A_MBS	A_closed	V	V_CH	V_MBS	D_neck,min	D_neck,max	P_neck	D_neck,equiv	A_neck	A_neck,elliptical	AR	eAR	BF	BL	NSI	AVSV	AASA	UI	EI	MAA	absMAA	MSD	HMC	MLN	GAA	absGAA	GSD	HGC	GLN
H	1	0.898198	0.964773	0.841837	0.911694	0.882452	0.878723	0.875404	0.87693	0.778695	0.783505	0.814854	0.567946	0.637334	0.605171	0.658425	0.569397	0.55023	0.787142	0.883393	0.632329	0.464825	-0.303659	0.0760635	-0.0143392	-0.129828	-0.353151	-0.765111	-0.771895	-0.696873	0.382113	0.647619	-0.669349	-0.623001	-0.594122	0.33821	0.671054
L_max	0.898198	1	0.97004	0.98369	0.761116	0.894653	0.914219	0.958792	0.911249	0.790367	0.796443	0.873951	0.796779	0.83115	0.829117	0.857775	0.814222	0.799946	0.53827	0.668179	0.674	0.369595	-0.203532	-0.108236	-0.220334	-0.0783313	-0.205407	-0.837348	-0.832607	-0.719859	0.57595	0.709416	-0.741709	-0.674518	-0.639501	0.500569	0.713216
H_max	0.964773	0.97004	1	0.92659	0.849927	0.904542	0.909827	0.935179	0.907531	0.792868	0.798478	0.858522	0.684804	0.714517	0.702164	0.75235	0.675997	0.663056	0.697729	0.800312	0.705625	0.419219	-0.267602	-0.0207548	-0.12693	-0.117857	-0.295157	-0.817767	-0.815274	-0.715973	0.513448	0.719934	-0.720111	-0.662305	-0.629435	0.448515	0.730785
D_max	0.841837	0.98369	0.92659	1	0.692565	0.886185	0.908939	0.950765	0.906249	0.791698	0.797156	0.871542	0.818861	0.857755	0.857283	0.87556	0.845209	0.828841	0.427126	0.573349	0.67535	0.328155	-0.219291	-0.0799104	-0.193048	-0.106052	-0.204559	-0.815979	-0.813447	-0.70375	0.548818	0.674819	-0.71213	-0.654679	-0.623086	0.470018	0.672635
H_b	0.911694	0.761116	0.849927	0.692565	1	0.766889	0.755434	0.73585	0.753607	0.68067	0.684719	0.692368	0.474182	0.431245	0.410675	0.513178	0.404264	0.41737	0.843055	0.867223	0.659916	0.723464	-0.274948	0.098748	0.0170456	-0.0509116	-0.360249	-0.657745	-0.667953	-0.602468	0.320583	0.58894	-0.588516	-0.523374	-0.49767	0.300922	0.609139
A	0.882452	0.894653	0.904542	0.886185	0.766889	1	0.997368	0.97293	0.997683	0.975136	0.977056	0.985451	0.734598	0.640878	0.640675	0.737197	0.687318	0.704786	0.534969	0.595223	0.617985	0.281379	-0.300354	0.104267	0.0201976	-0.197248	-0.309971	-0.623997	-0.630953	-0.580728	0.284426	0.488748	-0.497314	-0.47095	-0.458393	0.224686	0.511747
A_CH	0.878723	0.914219	0.909827	0.908939	0.755434	0.997368	1	0.983973	0.999959	0.968514	0.970852	0.988108	0.772599	0.689514	0.692045	0.778577	0.737846	0.752554	0.506694	0.579292	0.602917	0.276048	-0.290652	0.0823261	-0.00565439	-0.191641	-0.293192	-0.649184	-0.655668	-0.600144	0.308171	0.49614	-0.522998	-0.493906	-0.479492	0.244217	0.518191
A_MBS	0.875404	0.958792	0.935179	0.950765	0.73585	0.97293	0.983973	1	0.982699	0.920843	0.9248	0.974339	0.802913	0.756252	0.760209	0.815969	0.797069	0.806305	0.492133	0.590326	0.629714	0.264027	-0.221155	-0.0390126	-0.136076	-0.138215	-0.208272	-0.688641	-0.689458	-0.615168	0.42756	0.55978	-0.567851	-0.521852	-0.504277	0.356634	0.57808
A_closed	0.87693	0.911249	0.907531	0.906249	0.753607	0.997683	0.999959	0.982699	1	0.970105	0.972345	0.988378	0.771292	0.686014	0.688664	0.776303	0.735145	0.750299	0.505096	0.576528	0.600461	0.273548	-0.294904	0.0880706	0.000476177	-0.196953	-0.297103	-0.645905	-0.652695	-0.598607	0.301573	0.491396	-0.519086	-0.491598	-0.477589	0.237199	0.513123
V	0.778695	0.790367	0.792868	0.791698	0.68067	0.975136	0.968514	0.920843	0.970105	1	0.99993	0.980844	0.716551	0.543121	0.553405	0.678614	0.640644	0.677813	0.436066	0.454053	0.526878	0.20506	-0.284826	0.150776	0.0830936	-0.207678	-0.291268	-0.482829	-0.493014	-0.473316	0.157899	0.33636	-0.357413	-0.347159	-0.345466	0.102704	0.359021
V_CH	0.783505	0.796443	0.798478	0.797156	0.684719	0.977056	0.970852	0.9248	0.972345	0.99993	1	0.982656	0.719904	0.549084	0.559137	0.683172	0.645427	0.682055	0.440006	0.459696	0.531111	0.208112	-0.280282	0.143902	0.0756875	-0.201957	-0.287516	-0.488724	-0.498432	-0.476633	0.167334	0.344401	-0.363585	-0.351438	-0.349205	0.112401	0.36761
V_MBS	0.814854	0.873951	0.858522	0.871542	0.692368	0.985451	0.988108	0.974339	0.988378	0.980844	0.982656	1	0.7748	0.646503	0.657607	0.748627	0.732946	0.762442	0.444087	0.498316	0.571386	0.20192	-0.23648	0.039344	-0.0417845	-0.172834	-0.224961	-0.556111	-0.561239	-0.519824	0.28854	0.423721	-0.428966	-0.40306	-0.397432	0.22337	0.444701
D_neck,min	0.567946	0.796779	0.684804	0.818861	0.474182	0.734598	0.772599	0.802913	0.771292	0.716551	0.719904	0.7748	1	0.784733	0.842017	0.947249	0.914815	0.948125	0.138188	0.190332	0.371579	0.190005	-0.170777	-0.0170225	-0.101169	-0.132551	-0.140921	-0.682817	-0.685144	-0.61965	0.363065	0.391254	-0.595	-0.596173	-0.573985	0.262396	0.37943
D_neck,max	0.637334	0.83115	0.714517	0.857755	0.431245	0.640878	0.689514	0.756252	0.686014	0.543121	0.549084	0.646503	0.784733	1	0.987346	0.893182	0.938209	0.885643	0.120814	0.369571	0.24966	0.1658	-0.172251	-0.100459	-0.196957	-0.132755	-0.107958	-0.778102	-0.780346	-0.678777	0.424975	0.475559	-0.695282	-0.650566	-0.613924	0.345219	0.479057
P_neck	0.605171	0.829117	0.702164	0.857283	0.410675	0.640675	0.692045	0.760209	0.688664	0.553405	0.559137	0.657607	0.842017	0.987346	1	0.928265	0.968524	0.925144	0.0888016	0.31021	0.25519	0.147079	-0.192052	-0.0841076	-0.186422	-0.146787	-0.126522	-0.778084	-0.780374	-0.680134	0.42865	0.463978	-0.693846	-0.660714	-0.624191	0.341099	0.464212
D_neck,equiv	0.658425	0.857775	0.75235	0.87556	0.513178	0.737197	0.778577	0.815969	0.776303	0.678614	0.683172	0.748627	0.947249	0.893182	0.928265	1	0.942414	0.928528	0.193759	0.303827	0.364664	0.230242	-0.226734	-0.00598834	-0.10226	-0.144265	-0.200626	-0.816784	-0.817477	-0.724978	0.409798	0.484316	-0.734335	-0.719914	-0.685672	0.320339	0.485098
A_neck	0.569397	0.814222	0.675997	0.845209	0.404264	0.687318	0.737846	0.797069	0.735145	0.640644	0.645427	0.732946	0.914815	0.938209	0.968524	0.942414	1	0.987733	0.062002	0.224246	0.252962	0.116763	-0.155682	-0.0986699	-0.196162	-0.137304	-0.0833398	-0.678211	-0.681384	-0.604389	0.385581	0.376286	-0.586548	-0.555786	-0.531337	0.293578	0.379092
A_neck,elliptical	0.55023	0.799946	0.663056	0.828841	0.41737	0.704786	0.752554	0.806305	0.750299	0.677813	0.682055	0.762442	0.948125	0.885643	0.925144	0.928528	0.987733	1	0.0667525	0.193796	0.273572	0.126293	-0.128639	-0.104278	-0.196907	-0.123278	-0.0602351	-0.628254	-0.631842	-0.566423	0.37188	0.344873	-0.535657	-0.508768	-0.489649	0.27527	0.341428
AR	0.787142	0.53827	0.697729	0.427126	0.843055	0.534969	0.506694	0.492133	0.505096	0.436066	0.440006	0.444087	0.138188	0.120814	0.0888016	0.193759	0.062002	0.0667525	1	0.918689	0.63119	0.575132	-0.23075	0.0688382	0.00125778	0.00503173	-0.358773	-0.485014	-0.486805	-0.458295	0.331453	0.582309	-0.459856	-0.42268	-0.409045	0.313493	0.570394
eAR	0.883393	0.668179	0.800312	0.573349	0.867223	0.595223	0.579292	0.590326	0.576528	0.454053	0.459696	0.498316	0.190332	0.369571	0.31021	0.303827	0.224246	0.193796	0.918689	1	0.587961	0.543043	-0.235254	0.0226598	-0.0541222	-0.0394789	-0.311772	-0.61499	-0.61965	-0.556059	0.378148	0.640505	-0.56623	-0.505985	-0.477883	0.361252	0.650092
BF	0.632329	0.674	0.705625	0.67535	0.659916	0.617985	0.602917	0.629714	0.600461	0.526878	0.531111	0.571386	0.371579	0.24966	0.25519	0.364664	0.252962	0.273572	0.63119	0.587961	1	0.497217	-0.0817759	-0.159735	-0.253956	0.118459	-0.154312	-0.52264	-0.50699	-0.407513	0.624194	0.733949	-0.479397	-0.402057	-0.384657	0.58792	0.692491
BL	0.464825	0.369595	0.419219	0.328155	0.723464	0.281379	0.276048	0.264027	0.273548	0.20506	0.208112	0.20192	0.190005	0.1658	0.147079	0.230242	0.116763	0.126293	0.575132	0.543043	0.497217	1	-0.207038	0.0842642	0.0117286	0.0887191	-0.341611	-0.47431	-0.465828	-0.379244	0.323164	0.522341	-0.49909	-0.39727	-0.366458	0.326104	0.481549
NSI	-0.303659	-0.203532	-0.267602	-0.219291	-0.274948	-0.300354	-0.290652	-0.221155	-0.294904	-0.284826	-0.280282	-0.23648	-0.170777	-0.172251	-0.192052	-0.226734	-0.155682	-0.128639	-0.23075	-0.235254	-0.0817759	-0.207038	1	-0.795922	-0.683763	0.886699	0.920334	0.314975	0.36896	0.49723	0.355325	-0.0083113	0.213651	0.418338	0.436279	0.468915	0.0572794
AVSV	0.0760635	-0.108236	-0.0207548	-0.0799104	0.098748	0.104267	0.0823261	-0.0390126	0.0880706	0.150776	0.143902	0.039344	-0.0170225	-0.100459	-0.0841076	-0.00598834	-0.0986699	-0.104278	0.0688382	0.0226598	-0.159735	0.0842642	-0.795922	1	0.979957	-0.668032	-0.829318	-0.0596503	-0.116258	-0.280503	-0.627737	-0.232581	0.0308999	-0.21412	-0.258859	-0.655651	-0.272524
AASA	-0.0143392	-0.220334	-0.12693	-0.193048	0.0170456	0.0201976	-0.00565439	-0.136076	0.000476177	0.0830936	0.0756875	-0.0417845	-0.101169	-0.196957	-0.186422	-0.10226	-0.196162	-0.196907	0.00125778	-0.0541222	-0.253956	0.0117286	-0.683763	0.979957	1	-0.581843	-0.739886	0.045366	-0.00763237	-0.172067	-0.702631	-0.317982	0.132607	-0.119352	-0.170294	-0.706852	-0.341557
UI	-0.129828	-0.0783313	-0.117857	-0.106052	-0.0509116	-0.197248	-0.191641	-0.138215	-0.196953	-0.207678	-0.201957	-0.172834	-0.132551	-0.132755	-0.146787	-0.144265	-0.137304	-0.123278	0.00503173	-0.0394789	0.118459	0.0887191	0.886699	-0.668032	-0.581843	1	0.666315	0.107638	0.17033	0.336742	0.496125	0.24716	-0.00540429	0.211441	0.235141	0.628473	0.293141
EI	-0.353151	-0.205407	-0.295157	-0.204559	-0.360249	-0.309971	-0.293192	-0.208272	-0.297103	-0.291268	-0.287516	-0.224961	-0.140921	-0.107958	-0.126522	-0.200626	-0.0833398	-0.0602351	-0.358773	-0.311772	-0.154312	-0.341611	0.920334	-0.829318	-0.739886	0.666315	1	0.357221	0.396586	0.502466	0.263534	-0.151668	0.266445	0.470827	0.4961	0.350271	-0.0773001
MAA	-0.765111	-0.837348	-0.817767	-0.815979	-0.657745	-0.623997	-0.649184	-0.688641	-0.645905	-0.482829	-0.488724	-0.556111	-0.682817	-0.778102	-0.778084	-0.816784	-0.678211	-0.628254	-0.485014	-0.61499	-0.52264	-0.47431	0.314975	-0.0596503	0.045366	0.107638	0.357221	1	0.988866	0.835366	-0.507322	-0.726237	0.966732	0.914289	0.852859	-0.44054	-0.699771
absMAA	-0.771895	-0.832607	-0.815274	-0.813447	-0.667953	-0.630953	-0.655668	-0.689458	-0.652695	-0.493014	-0.498432	-0.561239	-0.685144	-0.780346	-0.780374	-0.817477	-0.681384	-0.631842	-0.486805	-0.61965	-0.50699	-0.465828	0.36896	-0.116258	-0.00763237	0.17033	0.396586	0.988866	1	0.898684	-0.4408	-0.669012	0.939207	0.936237	0.887035	-0.367851	-0.641447
MSD	-0.696873	-0.719859	-0.715973	-0.70375	-0.602468	-0.580728	-0.600144	-0.615168	-0.598607	-0.473316	-0.476633	-0.519824	-0.61965	-0.678777	-0.680134	-0.724978	-0.604389	-0.566423	-0.458295	-0.556059	-0.407513	-0.379244	0.49723	-0.280503	-0.172067	0.336742	0.502466	0.835366	0.898684	1	-0.230973	-0.435996	0.743977	0.922327	0.935017	-0.117641	-0.386389
HMC	0.382113	0.57595	0.513448	0.548818	0.320583	0.284426	0.308171	0.42756	0.301573	0.157899	0.167334	0.28854	0.363065	0.424975	0.42865	0.409798	0.385581	0.37188	0.331453	0.378148	0.624194	0.323164	0.355325	-0.627737	-0.702631	0.496125	0.263534	-0.507322	-0.4408	-0.230973	1	0.8552	-0.549461	-0.373183	-0.318897	0.960005	0.809348
MLN	0.647619	0.709416	0.719934	0.674819	0.58894	0.488748	0.49614	0.55978	0.491396	0.33636	0.344401	0.423721	0.391254	0.475559	0.463978	0.484316	0.376286	0.344873	0.582309	0.640505	0.733949	0.522341	-0.0083113	-0.232581	-0.317982	0.24716	-0.151668	-0.726237	-0.669012	-0.435996	0.8552	1	-0.723905	-0.584751	-0.516595	0.818861	0.959635
GAA	-0.669349	-0.741709	-0.720111	-0.71213	-0.588516	-0.497314	-0.522998	-0.567851	-0.519086	-0.357413	-0.363585	-0.428966	-0.595	-0.695282	-0.693846	-0.734335	-0.586548	-0.535657	-0.459856	-0.56623	-0.479397	-0.49909	0.213651	0.0308999	0.132607	-0.00540429	0.266445	0.966732	0.939207	0.743977	-0.549461	-0.723905	1	0.861916	0.777599	-0.506773	-0.696564
absGAA	-0.623001	-0.674518	-0.662305	-0.654679	-0.523374	-0.47095	-0.493906	-0.521852	-0.491598	-0.347159	-0.351438	-0.40306	-0.596173	-0.650566	-0.660714	-0.719914	-0.555786	-0.508768	-0.42268	-0.505985	-0.402057	-0.39727	0.418338	-0.21412	-0.119352	0.211441	0.470827	0.914289	0.936237	0.922327	-0.373183	-0.584751	0.861916	1	0.984152	-0.255887	-0.505866
GSD	-0.594122	-0.639501	-0.629435	-0.623086	-0.49767	-0.458393	-0.479492	-0.504277	-0.477589	-0.345466	-0.349205	-0.397432	-0.573985	-0.613924	-0.624191	-0.685672	-0.531337	-0.489649	-0.409045	-0.477883	-0.384657	-0.366458	0.436279	-0.258859	-0.170294	0.235141	0.4961	0.852859	0.887035	0.935017	-0.318897	-0.516595	0.777599	0.984152	1	-0.188657	-0.42399
HGC	0.33821	0.500569	0.448515	0.470018	0.300922	0.224686	0.244217	0.356634	0.237199	0.102704	0.112401	0.22337	0.262396	0.345219	0.341099	0.320339	0.293578	0.27527	0.313493	0.361252	0.58792	0.326104	0.468915	-0.655651	-0.706852	0.628473	0.350271	-0.44054	-0.367851	-0.117641	0.960005	0.818861	-0.506773	-0.255887	-0.188657	1	0.827994
GLN	0.671054	0.713216	0.730785	0.672635	0.609139	0.511747	0.518191	0.57808	0.513123	0.359021	0.36761	0.444701	0.37943	0.479057	0.464212	0.485098	0.379092	0.341428	0.570394	0.650092	0.692491	0.481549	0.0572794	-0.272524	-0.341557	0.293141	-0.0773001	-0.699771	-0.641447	-0.386389	0.809348	0.959635	-0.696564	-0.505866	-0.42399	0.827994	1

## Sheet: posterior region, site 1
Pearson's r	H	L_max	H_max	D_max	H_b	A	A_CH	A_MBS	A_closed	V	V_CH	V_MBS	D_neck,min	D_neck,max	P_neck	D_neck,equiv	A_neck	A_neck,elliptical	AR	eAR	BF	BL	NSI	AVSV	AASA	UI	EI	MAA	absMAA	MSD	HMC	MLN	GAA	absGAA	GSD	HGC	GLN
H	1	0.957212	0.983669	0.916336	0.913472	0.935849	0.934758	0.950499	0.933264	0.845586	0.852974	0.900011	0.495396	0.695252	0.598438	0.496892	0.479124	0.629776	0.589006	0.770126	0.555207	0.421843	-0.414747	0.493291	0.448274	-0.21316	-0.573848	-0.820866	-0.855007	-0.715902	0.141827	0.436166	-0.750615	-0.791394	-0.733459	0.121499	0.30694
L_max	0.957212	1	0.97943	0.97902	0.852762	0.922674	0.934444	0.971946	0.932438	0.815948	0.827025	0.900957	0.570722	0.82414	0.734067	0.616207	0.618005	0.75395	0.411893	0.657917	0.521577	0.392488	-0.372357	0.474478	0.442475	-0.157548	-0.588424	-0.886739	-0.907484	-0.741082	0.210164	0.472354	-0.816241	-0.842743	-0.78195	0.192483	0.34657
H_max	0.983669	0.97943	1	0.943834	0.904115	0.926767	0.929809	0.960756	0.927909	0.824857	0.834352	0.898622	0.509694	0.732744	0.632126	0.530111	0.518268	0.662127	0.537941	0.730429	0.572546	0.447069	-0.365635	0.448587	0.408542	-0.158099	-0.550982	-0.843911	-0.873024	-0.72077	0.19359	0.463877	-0.78256	-0.803332	-0.748559	0.173915	0.326683
D_max	0.916336	0.97902	0.943834	1	0.807453	0.911613	0.925218	0.947999	0.923454	0.805308	0.816658	0.874946	0.597758	0.809532	0.736888	0.644258	0.636544	0.761854	0.359983	0.593115	0.581302	0.362086	-0.39049	0.533591	0.517193	-0.156961	-0.634425	-0.890934	-0.905388	-0.742355	0.191862	0.468614	-0.807351	-0.848012	-0.800409	0.173053	0.335499
H_b	0.913472	0.852762	0.904115	0.807453	1	0.838832	0.826466	0.85072	0.824223	0.74925	0.754985	0.807844	0.351988	0.526922	0.413109	0.305293	0.284077	0.458279	0.642455	0.796632	0.631051	0.718501	-0.415367	0.40622	0.351241	-0.212217	-0.537815	-0.709886	-0.7438	-0.621252	0.131579	0.421961	-0.647301	-0.687163	-0.636988	0.106138	0.307887
A	0.935849	0.922674	0.926767	0.911613	0.838832	1	0.997326	0.977577	0.997365	0.971624	0.975877	0.982941	0.394802	0.729596	0.629664	0.472282	0.51347	0.614956	0.407735	0.690178	0.45919	0.328212	-0.436367	0.566812	0.528291	-0.251396	-0.578034	-0.733218	-0.778103	-0.690626	0.0153726	0.308306	-0.634938	-0.700483	-0.660163	0.00234638	0.210024
A_CH	0.934758	0.934444	0.929809	0.925218	0.826466	0.997326	1	0.981136	0.999917	0.965006	0.969633	0.978797	0.437173	0.772027	0.682199	0.528549	0.573826	0.665589	0.374883	0.65827	0.436676	0.312516	-0.44635	0.584881	0.546839	-0.25586	-0.592352	-0.758743	-0.804929	-0.715565	0.00762812	0.299867	-0.658232	-0.727535	-0.689552	-0.000892131	0.199737
A_MBS	0.950499	0.971946	0.960756	0.947999	0.85072	0.977577	0.981136	1	0.980036	0.916941	0.925068	0.977043	0.464167	0.795521	0.683662	0.533595	0.561508	0.688688	0.384347	0.674485	0.459043	0.350838	-0.377488	0.478338	0.439822	-0.195159	-0.539718	-0.790582	-0.828643	-0.718424	0.109547	0.360983	-0.703511	-0.752974	-0.714599	0.0958537	0.248698
A_closed	0.933264	0.932438	0.927909	0.923454	0.824223	0.997365	0.999917	0.980036	1	0.966163	0.970536	0.978626	0.437171	0.771687	0.682495	0.528994	0.574376	0.665372	0.37234	0.655458	0.432449	0.309535	-0.453857	0.590221	0.551198	-0.265704	-0.596153	-0.757219	-0.804319	-0.71723	-0.00031044	0.293502	-0.654989	-0.727646	-0.689546	-0.00983454	0.193909
V	0.845586	0.815948	0.824857	0.805308	0.74925	0.971624	0.965006	0.916941	0.966163	1	0.999518	0.969887	0.290812	0.664062	0.566929	0.398609	0.464594	0.5323	0.324163	0.619445	0.334761	0.246271	-0.437328	0.559529	0.513418	-0.287652	-0.513499	-0.593069	-0.653737	-0.626857	-0.108399	0.155474	-0.487624	-0.571187	-0.551816	-0.11614	0.0787425
V_CH	0.852974	0.827025	0.834352	0.816658	0.754985	0.975877	0.969633	0.925068	0.970536	0.999518	1	0.974603	0.296763	0.671495	0.572458	0.403532	0.468327	0.539546	0.327743	0.62597	0.345711	0.250901	-0.421149	0.550257	0.507404	-0.26783	-0.509675	-0.603187	-0.660326	-0.625753	-0.0835705	0.17815	-0.500147	-0.577336	-0.556936	-0.0905325	0.098714
V_MBS	0.900011	0.900957	0.898622	0.874946	0.807844	0.982941	0.978797	0.977043	0.978626	0.969887	0.974603	1	0.348421	0.732504	0.607435	0.435694	0.484317	0.596918	0.341171	0.659089	0.379791	0.301473	-0.369584	0.463312	0.419724	-0.219324	-0.481203	-0.671744	-0.721467	-0.660546	0.0207391	0.25259	-0.577494	-0.639555	-0.616699	0.00912196	0.158471
D_neck,min	0.495396	0.570722	0.509694	0.597758	0.351988	0.394802	0.437173	0.464167	0.437171	0.290812	0.296763	0.348421	1	0.648726	0.70741	0.908351	0.716127	0.86268	0.00580875	-0.0807847	0.135553	0.0479792	-0.407628	0.418727	0.396386	-0.298764	-0.463757	-0.71292	-0.761948	-0.693057	-0.0586283	0.0731011	-0.603378	-0.787487	-0.835973	-0.0608856	-0.0861358
D_neck,max	0.695252	0.82414	0.732744	0.809532	0.526922	0.729596	0.772027	0.795521	0.771687	0.664062	0.671495	0.732504	0.648726	1	0.967808	0.829857	0.895195	0.928825	-0.106263	0.232129	0.0297649	0.0879644	-0.423287	0.556663	0.534919	-0.257763	-0.58186	-0.822855	-0.844668	-0.710486	-0.0413852	0.177977	-0.733647	-0.783323	-0.730098	-0.0092134	0.131943
P_neck	0.598438	0.734067	0.632126	0.736888	0.413109	0.629664	0.682199	0.683662	0.682495	0.566929	0.572458	0.607435	0.70741	0.967808	1	0.899248	0.967789	0.948445	-0.161184	0.103247	-0.022645	0.0239743	-0.465658	0.616886	0.595268	-0.30033	-0.609603	-0.785883	-0.81808	-0.709316	-0.10841	0.111456	-0.684807	-0.773327	-0.733676	-0.0728083	0.0665248
D_neck,equiv	0.496892	0.616207	0.530111	0.644258	0.305293	0.472282	0.528549	0.533595	0.528994	0.398609	0.403532	0.435694	0.908351	0.829857	0.899248	1	0.92797	0.954128	-0.154381	-0.114184	-0.00131672	-0.0415313	-0.441468	0.532891	0.511808	-0.311799	-0.518641	-0.741635	-0.785519	-0.713674	-0.144343	0.00849572	-0.632947	-0.772601	-0.811273	-0.109135	-0.109418
A_neck	0.479124	0.618005	0.518268	0.636544	0.284077	0.51347	0.573826	0.561508	0.574376	0.464594	0.468327	0.484317	0.716127	0.895195	0.967789	0.92797	1	0.931211	-0.19655	-0.0347374	-0.0661806	-0.0421314	-0.444523	0.585573	0.55865	-0.306141	-0.529113	-0.6832	-0.733844	-0.690802	-0.177113	-0.00716864	-0.582962	-0.70278	-0.707072	-0.142788	-0.0762144
A_neck,elliptical	0.629776	0.75395	0.662127	0.761854	0.458279	0.614956	0.665589	0.688688	0.665372	0.5323	0.539546	0.596918	0.86268	0.928825	0.948445	0.954128	0.931211	1	-0.0820241	0.0782739	0.0568448	0.074149	-0.447167	0.530444	0.501777	-0.304264	-0.547102	-0.80213	-0.84779	-0.766852	-0.0697275	0.107145	-0.695175	-0.826014	-0.829376	-0.0595611	-0.00537622
AR	0.589006	0.411893	0.537941	0.359983	0.642455	0.407735	0.374883	0.384347	0.37234	0.324163	0.327743	0.341171	0.00580875	-0.106263	-0.161184	-0.154381	-0.19655	-0.0820241	1	0.814152	0.756819	0.53122	-0.0958778	0.03358	-0.0240452	0.00591625	-0.132083	-0.236206	-0.272409	-0.255398	0.313511	0.443856	-0.262324	-0.270608	-0.237004	0.223341	0.293803
eAR	0.770126	0.657917	0.730429	0.593115	0.796632	0.690178	0.65827	0.674485	0.655458	0.619445	0.62597	0.659089	-0.0807847	0.232129	0.103247	-0.114184	-0.0347374	0.0782739	0.814152	1	0.668515	0.543829	-0.156231	0.197472	0.160629	0.0127411	-0.326207	-0.42697	-0.432729	-0.321771	0.348839	0.580473	-0.434568	-0.385399	-0.255305	0.280424	0.523195
BF	0.555207	0.521577	0.572546	0.581302	0.631051	0.45919	0.436676	0.459043	0.432449	0.334761	0.345711	0.379791	0.135553	0.0297649	-0.022645	-0.00131672	-0.0661806	0.0568448	0.756819	0.668515	1	0.58524	-0.0671622	0.12638	0.127741	0.144474	-0.300857	-0.421121	-0.411185	-0.303947	0.447393	0.607239	-0.422755	-0.405564	-0.384338	0.370361	0.444199
BL	0.421843	0.392488	0.447069	0.362086	0.718501	0.328212	0.312516	0.350838	0.309535	0.246271	0.250901	0.301473	0.0479792	0.0879644	0.0239743	-0.0415313	-0.0421314	0.074149	0.53122	0.543829	0.58524	1	-0.2191	0.0690774	0.0154103	-0.0558387	-0.306671	-0.308991	-0.314402	-0.223963	0.245995	0.389767	-0.306589	-0.301425	-0.25921	0.189653	0.29912
NSI	-0.414747	-0.372357	-0.365635	-0.39049	-0.415367	-0.436367	-0.44635	-0.377488	-0.453857	-0.437328	-0.421149	-0.369584	-0.407628	-0.423287	-0.465658	-0.441468	-0.444523	-0.447167	-0.0958778	-0.156231	-0.0671622	-0.2191	1	-0.840249	-0.73976	0.924928	0.83608	0.475156	0.582559	0.695344	0.657792	0.306551	0.293769	0.630295	0.613736	0.701353	0.312759
AVSV	0.493291	0.474478	0.448587	0.533591	0.40622	0.566812	0.584881	0.478338	0.590221	0.559529	0.550257	0.463312	0.418727	0.556663	0.616886	0.532891	0.585573	0.530444	0.03358	0.197472	0.12638	0.0690774	-0.840249	1	0.981521	-0.67115	-0.890857	-0.606445	-0.654699	-0.635231	-0.516875	-0.0694385	-0.439327	-0.666051	-0.60285	-0.495251	-0.0442599
AASA	0.448274	0.442475	0.408542	0.517193	0.351241	0.528291	0.546839	0.439822	0.551198	0.513418	0.507404	0.419724	0.396386	0.534919	0.595268	0.511808	0.55865	0.501777	-0.0240452	0.160629	0.127741	0.0154103	-0.73976	0.981521	1	-0.551237	-0.865837	-0.604366	-0.620574	-0.548628	-0.439756	0.0141339	-0.447798	-0.629026	-0.555401	-0.394056	0.0541007
UI	-0.21316	-0.157548	-0.158099	-0.156961	-0.212217	-0.251396	-0.25586	-0.195159	-0.265704	-0.287652	-0.26783	-0.219324	-0.298764	-0.257763	-0.30033	-0.311799	-0.306141	-0.304264	0.00591625	0.0127411	0.144474	-0.0558387	0.924928	-0.67115	-0.551237	1	0.597668	0.218815	0.355258	0.581589	0.769566	0.527453	0.0315653	0.43163	0.449977	0.837708	0.517101
EI	-0.573848	-0.588424	-0.550982	-0.634425	-0.537815	-0.578034	-0.592352	-0.539718	-0.596153	-0.513499	-0.509675	-0.481203	-0.463757	-0.58186	-0.609603	-0.518641	-0.529113	-0.547102	-0.132083	-0.326207	-0.300857	-0.306671	0.83608	-0.890857	-0.865837	0.597668	1	0.750419	0.76001	0.638685	0.266092	-0.169398	0.608314	0.773082	0.673607	0.269542	-0.168634
MAA	-0.820866	-0.886739	-0.843911	-0.890934	-0.709886	-0.733218	-0.758743	-0.790582	-0.757219	-0.593069	-0.603187	-0.671744	-0.71292	-0.822855	-0.785883	-0.741635	-0.6832	-0.80213	-0.236206	-0.42697	-0.421121	-0.308991	0.475156	-0.606445	-0.604366	0.218815	0.750419	1	0.96461	0.685233	-0.141581	-0.469391	0.948384	0.923082	0.827716	-0.162494	-0.380104
absMAA	-0.855007	-0.907484	-0.873024	-0.905388	-0.7438	-0.778103	-0.804929	-0.828643	-0.804319	-0.653737	-0.660326	-0.721467	-0.761948	-0.844668	-0.81808	-0.785519	-0.733844	-0.84779	-0.272409	-0.432729	-0.411185	-0.314402	0.582559	-0.654699	-0.620574	0.355258	0.76001	0.96461	1	0.843312	0.0028038	-0.321574	0.859577	0.975227	0.914151	0.00147849	-0.219459
MSD	-0.715902	-0.741082	-0.72077	-0.742355	-0.621252	-0.690626	-0.715565	-0.718424	-0.71723	-0.626857	-0.625753	-0.660546	-0.693057	-0.710486	-0.709316	-0.713674	-0.690802	-0.766852	-0.255398	-0.321771	-0.303947	-0.223963	0.695344	-0.635231	-0.548628	0.581589	0.638685	0.685233	0.843312	1	0.304568	0.0710983	0.499383	0.874463	0.918246	0.348265	0.18727
HMC	0.141827	0.210164	0.19359	0.191862	0.131579	0.0153726	0.00762812	0.109547	-0.00031044	-0.108399	-0.0835705	0.0207391	-0.0586283	-0.0413852	-0.10841	-0.144343	-0.177113	-0.0697275	0.313511	0.348839	0.447393	0.245995	0.657792	-0.516875	-0.439756	0.769566	0.266092	-0.141581	0.0028038	0.304568	1	0.868078	-0.299542	0.0355652	0.132884	0.968667	0.781876
MLN	0.436166	0.472354	0.463877	0.468614	0.421961	0.308306	0.299867	0.360983	0.293502	0.155474	0.17815	0.25259	0.0731011	0.177977	0.111456	0.00849572	-0.00716864	0.107145	0.443856	0.580473	0.607239	0.389767	0.306551	-0.0694385	0.0141339	0.527453	-0.169398	-0.469391	-0.321574	0.0710983	0.868078	1	-0.567006	-0.28304	-0.107093	0.851524	0.941225
GAA	-0.750615	-0.816241	-0.78256	-0.807351	-0.647301	-0.634938	-0.658232	-0.703511	-0.654989	-0.487624	-0.500147	-0.577494	-0.603378	-0.733647	-0.684807	-0.632947	-0.582962	-0.695175	-0.262324	-0.434568	-0.422755	-0.306589	0.293769	-0.439327	-0.447798	0.0315653	0.608314	0.948384	0.859577	0.499383	-0.299542	-0.567006	1	0.796038	0.669352	-0.322186	-0.486618
absGAA	-0.791394	-0.842743	-0.803332	-0.848012	-0.687163	-0.700483	-0.727535	-0.752974	-0.727646	-0.571187	-0.577336	-0.639555	-0.787487	-0.783323	-0.773327	-0.772601	-0.70278	-0.826014	-0.270608	-0.385399	-0.405564	-0.301425	0.630295	-0.666051	-0.629026	0.43163	0.773082	0.923082	0.975227	0.874463	0.0355652	-0.28304	0.796038	1	0.939304	0.0616344	-0.180245
GSD	-0.733459	-0.78195	-0.748559	-0.800409	-0.636988	-0.660163	-0.689552	-0.714599	-0.689546	-0.551816	-0.556936	-0.616699	-0.835973	-0.730098	-0.733676	-0.811273	-0.707072	-0.829376	-0.237004	-0.255305	-0.384338	-0.25921	0.613736	-0.60285	-0.555401	0.449977	0.673607	0.827716	0.914151	0.918246	0.132884	-0.107093	0.669352	0.939304	1	0.143917	0.058814
HGC	0.121499	0.192483	0.173915	0.173053	0.106138	0.00234638	-0.000892131	0.0958537	-0.00983454	-0.11614	-0.0905325	0.00912196	-0.0608856	-0.0092134	-0.0728083	-0.109135	-0.142788	-0.0595611	0.223341	0.280424	0.370361	0.189653	0.701353	-0.495251	-0.394056	0.837708	0.269542	-0.162494	0.00147849	0.348265	0.968667	0.851524	-0.322186	0.0616344	0.143917	1	0.791354
GLN	0.30694	0.34657	0.326683	0.335499	0.307887	0.210024	0.199737	0.248698	0.193909	0.0787425	0.098714	0.158471	-0.0861358	0.131943	0.0665248	-0.109418	-0.0762144	-0.00537622	0.293803	0.523195	0.444199	0.29912	0.312759	-0.0442599	0.0541007	0.517101	-0.168634	-0.380104	-0.219459	0.18727	0.781876	0.941225	-0.486618	-0.180245	0.058814	0.791354	1

## Sheet: all regions combined, site 1
Pearson's r	H	L_max	H_max	D_max	H_b	A	A_CH	A_MBS	A_closed	V	V_CH	V_MBS	D_neck,min	D_neck,max	P_neck	D_neck,equiv	A_neck	A_neck,elliptical	AR	eAR	BF	BL	NSI	AVSV	AASA	UI	EI	MAA	absMAA	MSD	HMC	MLN	GAA	absGAA	GSD	HGC	GLN
H	1	0.927294	0.977693	0.868769	0.91606	0.8752	0.875949	0.885241	0.873347	0.766103	0.767559	0.788187	0.486544	0.631471	0.586579	0.515812	0.508205	0.517397	0.671314	0.843742	0.576855	0.465552	-0.210107	0.109701	0.0422365	-0.00139054	-0.331986	-0.783549	-0.785503	-0.643577	0.493597	0.695112	-0.657648	-0.660635	-0.619842	0.468012	0.680503
L_max	0.927294	1	0.974554	0.978292	0.806514	0.901601	0.916147	0.952766	0.912966	0.79421	0.798378	0.847531	0.624493	0.803435	0.767527	0.672862	0.69883	0.705482	0.467457	0.697016	0.570311	0.370613	-0.102233	-0.000658782	-0.0650511	0.0652586	-0.226261	-0.836887	-0.823716	-0.633532	0.615665	0.751901	-0.698899	-0.693868	-0.648261	0.586953	0.737379
H_max	0.977693	0.974554	1	0.926336	0.881767	0.892586	0.89834	0.926997	0.895238	0.781282	0.784694	0.824516	0.536046	0.69514	0.653264	0.57097	0.578275	0.587038	0.610009	0.803395	0.608094	0.442898	-0.144474	0.0255441	-0.0442422	0.0485586	-0.269874	-0.814923	-0.808895	-0.639955	0.586554	0.749251	-0.689607	-0.683178	-0.636447	0.557199	0.729506
D_max	0.868769	0.978292	0.926336	1	0.744193	0.905004	0.921033	0.947069	0.918353	0.807012	0.811148	0.852397	0.640109	0.823431	0.791548	0.695033	0.727098	0.729053	0.356515	0.60218	0.57748	0.319876	-0.116146	0.0598835	0.00631453	0.0414767	-0.239655	-0.810093	-0.79423	-0.60908	0.581106	0.728728	-0.655761	-0.662835	-0.626602	0.562272	0.727724
H_b	0.91606	0.806514	0.881767	0.744193	1	0.766362	0.758575	0.763605	0.755752	0.661168	0.661894	0.675675	0.357352	0.437152	0.392038	0.339357	0.326329	0.362018	0.744182	0.851914	0.642149	0.721248	-0.246451	0.117915	0.0451503	-0.0219241	-0.354929	-0.673061	-0.684129	-0.588815	0.423417	0.623807	-0.568796	-0.569509	-0.543739	0.401062	0.604286
A	0.8752	0.901601	0.892586	0.905004	0.766362	1	0.997964	0.980141	0.998108	0.973558	0.974632	0.974823	0.446895	0.715539	0.662322	0.514621	0.583648	0.570107	0.362343	0.647032	0.442835	0.276723	-0.209444	0.198498	0.156116	-0.0753367	-0.302679	-0.63198	-0.628439	-0.520586	0.401842	0.612575	-0.465206	-0.492842	-0.478704	0.409949	0.676779
A_CH	0.875949	0.916147	0.89834	0.921033	0.758575	0.997964	1	0.985629	0.999932	0.966652	0.967694	0.971512	0.491219	0.753517	0.705586	0.56288	0.633381	0.618384	0.342462	0.627501	0.429881	0.267202	-0.204408	0.193917	0.150416	-0.0723325	-0.296523	-0.655496	-0.652318	-0.539282	0.408522	0.612512	-0.486067	-0.514891	-0.500957	0.413163	0.669989
A_MBS	0.885241	0.952766	0.926997	0.947069	0.763605	0.980141	0.985629	1	0.984446	0.931773	0.935114	0.966341	0.519776	0.775675	0.723892	0.582117	0.653401	0.650676	0.370075	0.650539	0.473868	0.278292	-0.126203	0.0735948	0.0252184	-0.00343463	-0.223231	-0.68548	-0.676791	-0.539836	0.507304	0.667104	-0.524721	-0.538675	-0.517455	0.506727	0.713667
A_closed	0.873347	0.912966	0.895238	0.918353	0.755752	0.998108	0.999932	0.984446	1	0.968432	0.969329	0.972188	0.489469	0.752638	0.704624	0.561584	0.632474	0.617069	0.338444	0.624065	0.424554	0.264532	-0.210066	0.19961	0.156055	-0.0805736	-0.29966	-0.652181	-0.649512	-0.53855	0.401481	0.607378	-0.482062	-0.512582	-0.499199	0.405736	0.666035
V	0.766103	0.79421	0.781282	0.807012	0.661168	0.973558	0.966652	0.931773	0.968432	1	0.999584	0.982853	0.350343	0.656419	0.598499	0.430786	0.524842	0.500397	0.24608	0.547726	0.314595	0.191178	-0.215974	0.22892	0.196203	-0.123817	-0.276228	-0.491768	-0.493596	-0.429012	0.288685	0.491395	-0.333453	-0.369334	-0.369507	0.309938	0.586509
V_CH	0.767559	0.798378	0.784694	0.811148	0.661894	0.974632	0.967694	0.935114	0.969329	0.999584	1	0.985914	0.347325	0.658118	0.599213	0.428738	0.523161	0.49788	0.248501	0.552729	0.321226	0.192737	-0.202349	0.218206	0.187209	-0.106831	-0.269578	-0.494503	-0.493886	-0.424138	0.306363	0.506704	-0.337266	-0.369927	-0.368969	0.329693	0.602642
V_MBS	0.788187	0.847531	0.824516	0.852397	0.675675	0.974823	0.971512	0.966341	0.972188	0.982853	0.985914	1	0.386258	0.698011	0.635066	0.461281	0.558527	0.543322	0.271021	0.57864	0.362766	0.204467	-0.140249	0.122349	0.0877826	-0.051567	-0.214439	-0.534514	-0.528305	-0.435005	0.401033	0.569565	-0.378914	-0.401747	-0.395044	0.421897	0.660279
D_neck,min	0.486544	0.624493	0.536046	0.640109	0.357352	0.446895	0.491219	0.519776	0.489469	0.350343	0.347325	0.386258	1	0.714522	0.771719	0.935774	0.834206	0.902019	0.0336334	0.0444774	0.148873	0.0741859	-0.0987429	0.0930682	0.0613439	-0.0918317	-0.107712	-0.685855	-0.696657	-0.578013	0.230323	0.286614	-0.550963	-0.639183	-0.64571	0.158357	0.202909
D_neck,max	0.631471	0.803435	0.69514	0.823431	0.437152	0.715539	0.753517	0.775675	0.752638	0.656419	0.658118	0.698011	0.714522	1	0.977977	0.852889	0.925411	0.8883	-0.0507247	0.262546	0.0672608	0.0603641	-0.131623	0.11764	0.077543	-0.0776526	-0.174697	-0.737068	-0.736554	-0.587347	0.332497	0.435636	-0.589172	-0.625983	-0.607595	0.306742	0.432789
P_neck	0.586579	0.767527	0.653264	0.791548	0.392038	0.662322	0.705586	0.723892	0.704624	0.598499	0.599213	0.635066	0.771719	0.977977	1	0.896777	0.961726	0.911393	-0.0782395	0.189156	0.0491215	0.0313771	-0.154966	0.152912	0.111867	-0.0987664	-0.192667	-0.736818	-0.738017	-0.591835	0.299761	0.397593	-0.588181	-0.635879	-0.621255	0.269672	0.384788
D_neck,equiv	0.515812	0.672862	0.57097	0.695033	0.339357	0.514621	0.56288	0.582117	0.561584	0.430786	0.428738	0.461281	0.935774	0.852889	0.896777	1	0.933378	0.929443	-0.0557216	0.0471	0.0601021	0.0218967	-0.131721	0.137865	0.103538	-0.0985648	-0.151515	-0.737549	-0.744145	-0.606764	0.226272	0.299231	-0.600162	-0.669114	-0.671221	0.176353	0.236871
A_neck	0.508205	0.69883	0.578275	0.727098	0.326329	0.583648	0.633381	0.653401	0.632474	0.524842	0.523161	0.558527	0.834206	0.925411	0.961726	0.933378	1	0.967132	-0.0950512	0.0905234	0.02811	0.00743973	-0.135693	0.135488	0.0942103	-0.115008	-0.144361	-0.65141	-0.660776	-0.554071	0.239817	0.304218	-0.505728	-0.560636	-0.562005	0.193875	0.270042
A_neck,elliptical	0.517397	0.705482	0.587038	0.729053	0.362018	0.570107	0.618384	0.650676	0.617069	0.500397	0.49788	0.543322	0.902019	0.8883	0.911393	0.929443	0.967132	1	-0.0489409	0.100742	0.0770699	0.0500566	-0.103611	0.0812113	0.0394743	-0.101179	-0.106104	-0.648781	-0.658928	-0.551394	0.262829	0.311965	-0.504076	-0.562633	-0.563477	0.199019	0.260238
AR	0.671314	0.467457	0.610009	0.356515	0.744182	0.362343	0.342462	0.370075	0.338444	0.24608	0.248501	0.271021	0.0336334	-0.0507247	-0.0782395	-0.0557216	-0.0950512	-0.0489409	1	0.874137	0.734597	0.630616	-0.100919	-0.0972273	-0.171455	0.127094	-0.213708	-0.408548	-0.41464	-0.359023	0.445067	0.544714	-0.437924	-0.377147	-0.318833	0.396737	0.474419
eAR	0.843742	0.697016	0.803395	0.60218	0.851914	0.647032	0.627501	0.650539	0.624065	0.547726	0.552729	0.57864	0.0444774	0.262546	0.189156	0.0471	0.0905234	0.100742	0.874137	1	0.680004	0.591567	-0.115021	-0.0491193	-0.120266	0.12502	-0.257175	-0.550197	-0.545456	-0.434877	0.547226	0.698405	-0.525584	-0.465431	-0.390269	0.522835	0.686003
BF	0.576855	0.570311	0.608094	0.57748	0.642149	0.442835	0.429881	0.473868	0.424554	0.314595	0.321226	0.362766	0.148873	0.0672608	0.0491215	0.0601021	0.02811	0.0770699	0.734597	0.680004	1	0.552009	0.0304809	-0.167041	-0.22064	0.248834	-0.130062	-0.462958	-0.433948	-0.288395	0.633994	0.695051	-0.442862	-0.372083	-0.309073	0.612889	0.647137
BL	0.465552	0.370613	0.442898	0.319876	0.721248	0.276723	0.267202	0.278292	0.264532	0.191178	0.192737	0.204467	0.0741859	0.0603641	0.0313771	0.0218967	0.00743973	0.0500566	0.630616	0.591567	0.552009	1	-0.276235	0.0771758	-0.00603206	-0.0025102	-0.388513	-0.391936	-0.397339	-0.357428	0.322542	0.442219	-0.416224	-0.3671	-0.33855	0.275155	0.345714
NSI	-0.210107	-0.102233	-0.144474	-0.116146	-0.246451	-0.209444	-0.204408	-0.126203	-0.210066	-0.215974	-0.202349	-0.140249	-0.0987429	-0.131623	-0.154966	-0.131721	-0.135693	-0.103611	-0.100919	-0.115021	0.0304809	-0.276235	1	-0.792224	-0.68304	0.836954	0.894589	0.171545	0.243941	0.447864	0.4115	0.133488	0.0537425	0.270477	0.331222	0.478595	0.143004
AVSV	0.109701	-0.000658782	0.0255441	0.0598835	0.117915	0.198498	0.193917	0.0735948	0.19961	0.22892	0.218206	0.122349	0.0930682	0.11764	0.152912	0.137865	0.135488	0.0812113	-0.0972273	-0.0491193	-0.167041	0.0771758	-0.792224	1	0.98116	-0.654953	-0.769087	-0.0851213	-0.136526	-0.32661	-0.532242	-0.192077	0.0675193	-0.157441	-0.238481	-0.514075	-0.150081
AASA	0.0422365	-0.0650511	-0.0442422	0.00631453	0.0451503	0.156116	0.150416	0.0252184	0.156055	0.196203	0.187209	0.0877826	0.0613439	0.077543	0.111867	0.103538	0.0942103	0.0394743	-0.171455	-0.120266	-0.22064	-0.00603206	-0.68304	0.98116	1	-0.569567	-0.684048	-0.0243127	-0.0628797	-0.231958	-0.556175	-0.215551	0.127865	-0.0856982	-0.168074	-0.514101	-0.156106
UI	-0.00139054	0.0652586	0.0485586	0.0414767	-0.0219241	-0.0753367	-0.0723325	-0.00343463	-0.0805736	-0.123817	-0.106831	-0.051567	-0.0918317	-0.0776526	-0.0987664	-0.0985648	-0.115008	-0.101179	0.127094	0.12502	0.248834	-0.0025102	0.836954	-0.654953	-0.569567	1	0.529232	-0.0295285	0.0735425	0.343021	0.623576	0.418188	-0.165909	0.117494	0.188434	0.699274	0.376822
EI	-0.331986	-0.226261	-0.269874	-0.239655	-0.354929	-0.302679	-0.296523	-0.223231	-0.29966	-0.276228	-0.269578	-0.214439	-0.107712	-0.174697	-0.192667	-0.151515	-0.144361	-0.106104	-0.213708	-0.257175	-0.130062	-0.388513	0.894589	-0.769087	-0.684048	0.529232	1	0.296366	0.313934	0.403978	0.141997	-0.155773	0.194587	0.323393	0.363786	0.184531	-0.118734
MAA	-0.783549	-0.836887	-0.814923	-0.810093	-0.673061	-0.63198	-0.655496	-0.68548	-0.652181	-0.491768	-0.494503	-0.534514	-0.685855	-0.737068	-0.736818	-0.737549	-0.65141	-0.648781	-0.408548	-0.550197	-0.462958	-0.391936	0.171545	-0.0851213	-0.0243127	-0.0295285	0.296366	1	0.977885	0.719299	-0.486407	-0.641986	0.940678	0.914281	0.836352	-0.444781	-0.575265
absMAA	-0.785503	-0.823716	-0.808895	-0.79423	-0.684129	-0.628439	-0.652318	-0.676791	-0.649512	-0.493596	-0.493886	-0.528305	-0.696657	-0.736554	-0.738017	-0.744145	-0.660776	-0.658928	-0.41464	-0.545456	-0.433948	-0.397339	0.243941	-0.136526	-0.0628797	0.0735425	0.313934	0.977885	1	0.835202	-0.384576	-0.54686	0.903016	0.948971	0.892698	-0.336836	-0.486754
MSD	-0.643577	-0.633532	-0.639955	-0.60908	-0.588815	-0.520586	-0.539282	-0.539836	-0.53855	-0.429012	-0.424138	-0.435005	-0.578013	-0.587347	-0.591835	-0.606764	-0.554071	-0.551394	-0.359023	-0.434877	-0.288395	-0.357428	0.447864	-0.32661	-0.231958	0.343021	0.403978	0.719299	0.835202	1	-0.0652872	-0.210891	0.608265	0.854922	0.90279	-0.00331827	-0.174839
HMC	0.493597	0.615665	0.586554	0.581106	0.423417	0.401842	0.408522	0.507304	0.401481	0.288685	0.306363	0.401033	0.230323	0.332497	0.299761	0.226272	0.239817	0.262829	0.445067	0.547226	0.633994	0.322542	0.4115	-0.532242	-0.556175	0.623576	0.141997	-0.486407	-0.384576	-0.0652872	1	0.902013	-0.51662	-0.335962	-0.231768	0.966625	0.808634
MLN	0.695112	0.751901	0.749251	0.728728	0.623807	0.612575	0.612512	0.667104	0.607378	0.491395	0.506704	0.569565	0.286614	0.435636	0.397593	0.299231	0.304218	0.311965	0.544714	0.698405	0.695051	0.442219	0.133488	-0.192077	-0.215551	0.418188	-0.155773	-0.641986	-0.54686	-0.210891	0.902013	1	-0.607402	-0.475913	-0.36199	0.881146	0.939074
GAA	-0.657648	-0.698899	-0.689607	-0.655761	-0.568796	-0.465206	-0.486067	-0.524721	-0.482062	-0.333453	-0.337266	-0.378914	-0.550963	-0.589172	-0.588181	-0.600162	-0.505728	-0.504076	-0.437924	-0.525584	-0.442862	-0.416224	0.0537425	0.0675193	0.127865	-0.165909	0.194587	0.940678	0.903016	0.608265	-0.51662	-0.607402	1	0.85624	0.739248	-0.475815	-0.523928
absGAA	-0.660635	-0.693868	-0.683178	-0.662835	-0.569509	-0.492842	-0.514891	-0.538675	-0.512582	-0.369334	-0.369927	-0.401747	-0.639183	-0.625983	-0.635879	-0.669114	-0.560636	-0.562633	-0.377147	-0.465431	-0.372083	-0.3671	0.270477	-0.157441	-0.0856982	0.117494	0.323393	0.914281	0.948971	0.854922	-0.335962	-0.475913	0.85624	1	0.962076	-0.257761	-0.391979
GSD	-0.619842	-0.648261	-0.636447	-0.626602	-0.543739	-0.478704	-0.500957	-0.517455	-0.499199	-0.369507	-0.368969	-0.395044	-0.64571	-0.607595	-0.621255	-0.671221	-0.562005	-0.563477	-0.318833	-0.390269	-0.309073	-0.33855	0.331222	-0.238481	-0.168074	0.188434	0.363786	0.836352	0.892698	0.90279	-0.231768	-0.36199	0.739248	0.962076	1	-0.157225	-0.271902
HGC	0.468012	0.586953	0.557199	0.562272	0.401062	0.409949	0.413163	0.506727	0.405736	0.309938	0.329693	0.421897	0.158357	0.306742	0.269672	0.176353	0.193875	0.199019	0.396737	0.522835	0.612889	0.275155	0.478595	-0.514075	-0.514101	0.699274	0.184531	-0.444781	-0.336836	-0.00331827	0.966625	0.881146	-0.475815	-0.257761	-0.157225	1	0.84214
GLN	0.680503	0.737379	0.729506	0.727724	0.604286	0.676779	0.669989	0.713667	0.666035	0.586509	0.602642	0.660279	0.202909	0.432789	0.384788	0.236871	0.270042	0.260238	0.474419	0.686003	0.647137	0.345714	0.143004	-0.150081	-0.156106	0.376822	-0.118734	-0.575265	-0.486754	-0.174839	0.808634	0.939074	-0.523928	-0.391979	-0.271902	0.84214	1

## Sheet: anterior region, site 2
Pearson's r	H	L_max	H_max	D_max	H_b	A	A_CH	A_MBS	A_closed	V	V_CH	V_MBS	D_neck,min	D_neck,max	P_neck	D_neck,equiv	A_neck	A_neck,elliptical	AR	eAR	BF	BL	NSI	AVSV	AASA	UI	EI	MAA	absMAA	MSD	HMC	MLN	GAA	absGAA	GSD	HGC	GLN
H	1	0.987849	0.997208	0.940932	0.901096	0.977967	0.978785	0.971044	0.978665	0.960416	0.960645	0.951774	0.531246	0.779197	0.706967	0.676476	0.783256	0.790015	0.752393	0.796475	0.747229	0.180825	-0.149894	-0.196872	-0.303315	-0.371454	0.0264281	-0.720796	-0.739012	-0.481844	0.632292	0.739847	-0.544261	-0.561971	-0.496522	0.556601	0.810081
L_max	0.987849	1	0.991697	0.972855	0.876389	0.980581	0.98343	0.975178	0.983228	0.961223	0.961728	0.951746	0.575702	0.839481	0.768323	0.723262	0.834058	0.841251	0.678612	0.751522	0.732625	0.13387	-0.0788528	-0.258357	-0.351452	-0.31837	0.0879157	-0.735921	-0.749866	-0.498971	0.661748	0.728139	-0.541936	-0.576329	-0.525889	0.588665	0.817718
H_max	0.997208	0.991697	1	0.940869	0.898813	0.982619	0.982965	0.978156	0.982747	0.967206	0.967444	0.960023	0.510285	0.775216	0.696967	0.659954	0.772607	0.779644	0.744072	0.798784	0.752856	0.175165	-0.112577	-0.24791	-0.351582	-0.343239	0.06795	-0.700888	-0.721518	-0.494719	0.654067	0.72661	-0.525579	-0.548783	-0.494979	0.57038	0.797691
D_max	0.940932	0.972855	0.940869	1	0.824482	0.939448	0.946637	0.927528	0.946911	0.911109	0.911803	0.895236	0.707662	0.916325	0.873151	0.8328	0.922407	0.929383	0.550368	0.628713	0.705506	0.106174	-0.115364	-0.155695	-0.235229	-0.373692	0.0263572	-0.796208	-0.796831	-0.497443	0.604164	0.72248	-0.565778	-0.635194	-0.584315	0.539542	0.828638
H_b	0.901096	0.876389	0.898813	0.824482	1	0.83533	0.837003	0.816936	0.836707	0.799921	0.799882	0.782216	0.546632	0.614953	0.602292	0.616396	0.688537	0.69126	0.820181	0.784606	0.831248	0.554226	-0.338076	-0.0729584	-0.226746	-0.466253	-0.15584	-0.742035	-0.777999	-0.550861	0.561652	0.727403	-0.63612	-0.617936	-0.514712	0.492078	0.767045
A	0.977967	0.980581	0.982619	0.939448	0.83533	1	0.999704	0.998498	0.999681	0.996029	0.996134	0.991477	0.505452	0.779942	0.699285	0.654654	0.775049	0.784291	0.644906	0.724149	0.690243	0.052324	-0.0217548	-0.24338	-0.312327	-0.29185	0.153099	-0.624458	-0.645	-0.465749	0.572736	0.631327	-0.40267	-0.471301	-0.46548	0.496914	0.736432
A_CH	0.978785	0.98343	0.982965	0.946637	0.837003	0.999704	1	0.997468	0.999991	0.994169	0.994326	0.988786	0.52363	0.793376	0.715891	0.671413	0.789977	0.798899	0.638154	0.717721	0.688659	0.0530307	-0.0232748	-0.238148	-0.306557	-0.293316	0.148886	-0.638394	-0.65788	-0.469661	0.572952	0.636133	-0.413822	-0.483922	-0.476252	0.498853	0.742949
A_MBS	0.971044	0.975178	0.978156	0.927528	0.816936	0.998498	0.997468	1	0.997325	0.998186	0.998315	0.995981	0.468443	0.766782	0.676487	0.625718	0.752482	0.762257	0.639589	0.727998	0.67728	0.0268272	0.016366	-0.28559	-0.350012	-0.256033	0.192805	-0.59485	-0.615741	-0.45218	0.586178	0.61761	-0.379518	-0.443301	-0.443073	0.509678	0.722194
A_closed	0.978665	0.983228	0.982747	0.946911	0.836707	0.999681	0.999991	0.997325	1	0.994113	0.994261	0.988658	0.525209	0.79401	0.716835	0.672767	0.790755	0.799672	0.636819	0.716097	0.68811	0.0526195	-0.0249671	-0.235367	-0.30363	-0.296088	0.147124	-0.638963	-0.658409	-0.470584	0.570873	0.635312	-0.413307	-0.484879	-0.477796	0.496167	0.742046
V	0.960416	0.961223	0.967206	0.911109	0.799921	0.996029	0.994169	0.998186	0.994113	1	0.999994	0.998952	0.450007	0.74409	0.653648	0.604738	0.731957	0.742211	0.623446	0.711403	0.659754	0.00648512	0.0272138	-0.269418	-0.326414	-0.253063	0.204594	-0.56088	-0.583739	-0.442755	0.54886	0.582673	-0.337513	-0.413521	-0.426857	0.471847	0.691439
V_CH	0.960645	0.961728	0.967444	0.911803	0.799882	0.996134	0.994326	0.998315	0.994261	0.999994	1	0.998928	0.450707	0.745475	0.654985	0.605716	0.733141	0.743348	0.623268	0.711542	0.659546	0.00605285	0.0283995	-0.270761	-0.327697	-0.251302	0.205323	-0.561851	-0.584536	-0.441994	0.550461	0.58395	-0.338776	-0.413923	-0.426701	0.473978	0.692736
V_MBS	0.951774	0.951746	0.960023	0.895236	0.782216	0.991477	0.988786	0.995981	0.988658	0.998952	0.998928	1	0.413583	0.725321	0.626859	0.574335	0.705803	0.716516	0.620556	0.713494	0.647306	-0.0125006	0.0519768	-0.294347	-0.348128	-0.229322	0.230728	-0.531537	-0.554968	-0.428967	0.55254	0.568098	-0.314717	-0.386697	-0.404818	0.474651	0.674367
D_neck,min	0.531246	0.575702	0.510285	0.707662	0.546632	0.505452	0.52363	0.468443	0.525209	0.450007	0.450707	0.413583	1	0.776726	0.898868	0.957883	0.89029	0.886643	0.102107	0.0627327	0.344173	0.162506	-0.214862	0.292154	0.275943	-0.419556	-0.18903	-0.819571	-0.813126	-0.48072	0.0716663	0.389974	-0.548304	-0.751862	-0.715927	0.0662739	0.529635
D_neck,max	0.779197	0.839481	0.775216	0.916325	0.614953	0.779942	0.793376	0.766782	0.79401	0.74409	0.745475	0.725321	0.776726	1	0.967219	0.913623	0.962808	0.963534	0.270858	0.381615	0.415265	-0.0807406	-0.00249675	-0.111563	-0.144055	-0.255202	0.0542785	-0.814795	-0.791888	-0.444356	0.503215	0.601509	-0.566818	-0.661177	-0.63496	0.465496	0.699758
P_neck	0.706967	0.768323	0.696967	0.873151	0.602292	0.699285	0.715891	0.676487	0.716835	0.653648	0.654985	0.626859	0.898868	0.967219	1	0.971138	0.986821	0.983042	0.198818	0.263991	0.387205	-0.00884313	-0.0846546	0.0369869	0.0102752	-0.31072	-0.0490925	-0.847708	-0.828571	-0.479586	0.363231	0.541664	-0.578734	-0.721697	-0.697116	0.335162	0.656337
D_neck,equiv	0.676476	0.723262	0.659954	0.8328	0.616396	0.654654	0.671413	0.625718	0.672767	0.604738	0.605716	0.574335	0.957883	0.913623	0.971138	1	0.965939	0.963238	0.193214	0.200968	0.38048	0.0827337	-0.137348	0.139712	0.116127	-0.382907	-0.0977886	-0.869819	-0.857175	-0.488877	0.257052	0.510155	-0.597415	-0.761022	-0.722111	0.235702	0.630881
A_neck	0.783256	0.834058	0.772607	0.922407	0.688537	0.775049	0.789977	0.752482	0.790755	0.731957	0.733141	0.705803	0.89029	0.962808	0.986821	0.965939	1	0.999075	0.30259	0.365488	0.487109	0.048368	-0.0974335	0.00997984	-0.0268755	-0.334603	-0.0296819	-0.852	-0.840657	-0.485715	0.40184	0.594075	-0.581521	-0.708888	-0.672744	0.370416	0.717136
A_neck,elliptical	0.790015	0.841251	0.779644	0.929383	0.69126	0.784291	0.798899	0.762257	0.799672	0.742211	0.743348	0.716516	0.886643	0.963534	0.983042	0.963238	0.999075	1	0.307722	0.374973	0.499189	0.0454914	-0.0917619	0.00252843	-0.0346422	-0.336306	-0.0179328	-0.850679	-0.839348	-0.484714	0.406125	0.595125	-0.578804	-0.705293	-0.668806	0.376423	0.724384
AR	0.752393	0.678612	0.744072	0.550368	0.820181	0.644906	0.638154	0.639589	0.636819	0.623446	0.623268	0.620556	0.102107	0.270858	0.198818	0.193214	0.30259	0.307722	1	0.945786	0.813145	0.527621	-0.393164	-0.178817	-0.37119	-0.377183	-0.195866	-0.50127	-0.534641	-0.321198	0.653066	0.752048	-0.584074	-0.392519	-0.199992	0.591488	0.705769
eAR	0.796475	0.751522	0.798784	0.628713	0.784606	0.724149	0.717721	0.727998	0.716097	0.711403	0.711542	0.713494	0.0627327	0.381615	0.263991	0.200968	0.365488	0.374973	0.945786	1	0.796601	0.354215	-0.237623	-0.342673	-0.516061	-0.272119	-0.0219111	-0.475233	-0.502507	-0.354715	0.753565	0.7291	-0.526589	-0.358134	-0.216475	0.671437	0.705566
BF	0.747229	0.732625	0.752856	0.705506	0.831248	0.690243	0.688659	0.67728	0.68811	0.659754	0.659546	0.647306	0.344173	0.415265	0.387205	0.38048	0.487109	0.499189	0.813145	0.796601	1	0.565707	-0.431946	-0.106569	-0.282345	-0.528009	-0.217046	-0.573414	-0.596413	-0.395014	0.639364	0.775909	-0.553536	-0.479418	-0.319444	0.548485	0.78708
BL	0.180825	0.13387	0.175165	0.106174	0.554226	0.052324	0.0530307	0.0268272	0.0526195	0.00648512	0.00605285	-0.0125006	0.162506	-0.0807406	-0.00884313	0.0827337	0.048368	0.0454914	0.527621	0.354215	0.565707	1	-0.589642	0.22045	0.0388706	-0.460764	-0.495167	-0.369954	-0.409309	-0.319574	0.174804	0.379631	-0.537485	-0.395336	-0.225511	0.149329	0.284788
NSI	-0.149894	-0.0788528	-0.112577	-0.115364	-0.338076	-0.0217548	-0.0232748	0.016366	-0.0249671	0.0272138	0.0283995	0.0519768	-0.214862	-0.00249675	-0.0846546	-0.137348	-0.0974335	-0.0917619	-0.393164	-0.237623	-0.431946	-0.589642	1	-0.66761	-0.470932	0.868772	0.946559	0.351292	0.350535	0.27127	-0.0365464	-0.399455	0.396356	0.382301	0.262774	0.0667407	-0.255741
AVSV	-0.196872	-0.258357	-0.24791	-0.155695	-0.0729584	-0.24338	-0.238148	-0.28559	-0.235367	-0.269418	-0.270761	-0.294347	0.292154	-0.111563	0.0369869	0.139712	0.00997984	0.00252843	-0.178817	-0.342673	-0.106569	0.22045	-0.66761	1	0.966246	-0.591059	-0.732604	-0.117067	-0.108101	-0.0708621	-0.594413	-0.133998	-0.0507728	-0.181908	-0.18758	-0.577363	-0.176298
AASA	-0.303315	-0.351452	-0.351582	-0.235229	-0.226746	-0.312327	-0.306557	-0.350012	-0.30363	-0.326414	-0.327697	-0.348128	0.275943	-0.144055	0.0102752	0.116127	-0.0268755	-0.0346422	-0.37119	-0.516061	-0.282345	0.0388706	-0.470932	0.966246	1	-0.436135	-0.565285	-0.00158508	0.0102025	0.0187846	-0.742251	-0.309868	0.103075	-0.0745128	-0.127468	-0.700107	-0.312754
UI	-0.371454	-0.31837	-0.343239	-0.373692	-0.466253	-0.29185	-0.293316	-0.256033	-0.296088	-0.253063	-0.251302	-0.229322	-0.419556	-0.255202	-0.31072	-0.382907	-0.334603	-0.336306	-0.377183	-0.272119	-0.528009	-0.460764	0.868772	-0.591059	-0.436135	1	0.731738	0.49595	0.504658	0.50124	-0.0377802	-0.383459	0.397566	0.564994	0.530084	0.150014	-0.299294
EI	0.0264281	0.0879157	0.06795	0.0263572	-0.15584	0.153099	0.148886	0.192805	0.147124	0.204594	0.205323	0.230728	-0.18903	0.0542785	-0.0490925	-0.0977886	-0.0296819	-0.0179328	-0.195866	-0.0219111	-0.217046	-0.495167	0.946559	-0.732604	-0.565285	0.731738	1	0.254692	0.236521	0.0755787	0.0617748	-0.321751	0.300988	0.246806	0.120856	0.109041	-0.161451
MAA	-0.720796	-0.735921	-0.700888	-0.796208	-0.742035	-0.624458	-0.638394	-0.59485	-0.638963	-0.56088	-0.561851	-0.531537	-0.819571	-0.814795	-0.847708	-0.869819	-0.852	-0.850679	-0.50127	-0.475233	-0.573414	-0.369954	0.351292	-0.117067	-0.00158508	0.49595	0.254692	1	0.994514	0.585892	-0.427394	-0.681796	0.899556	0.921108	0.769563	-0.403727	-0.739766
absMAA	-0.739012	-0.749866	-0.721518	-0.796831	-0.777999	-0.645	-0.65788	-0.615741	-0.658409	-0.583739	-0.584536	-0.554968	-0.813126	-0.791888	-0.828571	-0.857175	-0.840657	-0.839348	-0.534641	-0.502507	-0.596413	-0.409309	0.350535	-0.108101	0.0102025	0.504658	0.236521	0.994514	1	0.64602	-0.411403	-0.656087	0.894604	0.93543	0.800613	-0.374935	-0.717772
MSD	-0.481844	-0.498971	-0.494719	-0.497443	-0.550861	-0.465749	-0.469661	-0.45218	-0.470584	-0.442755	-0.441994	-0.428967	-0.48072	-0.444356	-0.479586	-0.488877	-0.485715	-0.484714	-0.321198	-0.354715	-0.395014	-0.319574	0.27127	-0.0708621	0.0187846	0.50124	0.0755787	0.585892	0.64602	1	-0.135165	-0.112356	0.494039	0.784227	0.913254	0.0651013	-0.152742
HMC	0.632292	0.661748	0.654067	0.604164	0.561652	0.572736	0.572952	0.586178	0.570873	0.54886	0.550461	0.55254	0.0716663	0.503215	0.363231	0.257052	0.40184	0.406125	0.653066	0.753565	0.639364	0.174804	-0.0365464	-0.594413	-0.742251	-0.0377802	0.0617748	-0.427394	-0.411403	-0.135165	1	0.824554	-0.48973	-0.25851	-0.0885628	0.936965	0.757122
MLN	0.739847	0.728139	0.72661	0.72248	0.727403	0.631327	0.636133	0.61761	0.635312	0.582673	0.58395	0.568098	0.389974	0.601509	0.541664	0.510155	0.594075	0.595125	0.752048	0.7291	0.775909	0.379631	-0.399455	-0.133998	-0.309868	-0.383459	-0.321751	-0.681796	-0.656087	-0.112356	0.824554	1	-0.685167	-0.454291	-0.190397	0.808492	0.940465
GAA	-0.544261	-0.541936	-0.525579	-0.565778	-0.63612	-0.40267	-0.413822	-0.379518	-0.413307	-0.337513	-0.338776	-0.314717	-0.548304	-0.566818	-0.578734	-0.597415	-0.581521	-0.578804	-0.584074	-0.526589	-0.553536	-0.537485	0.396356	-0.0507728	0.103075	0.397566	0.300988	0.899556	0.894604	0.494039	-0.48973	-0.685167	1	0.855714	0.619186	-0.502384	-0.676346
absGAA	-0.561971	-0.576329	-0.548783	-0.635194	-0.617936	-0.471301	-0.483922	-0.443301	-0.484879	-0.413521	-0.413923	-0.386697	-0.751862	-0.661177	-0.721697	-0.761022	-0.708888	-0.705293	-0.392519	-0.358134	-0.479418	-0.395336	0.382301	-0.181908	-0.0745128	0.564994	0.246806	0.921108	0.93543	0.784227	-0.25851	-0.454291	0.855714	1	0.923192	-0.162853	-0.492023
GSD	-0.496522	-0.525889	-0.494979	-0.584315	-0.514712	-0.46548	-0.476252	-0.443073	-0.477796	-0.426857	-0.426701	-0.404818	-0.715927	-0.63496	-0.697116	-0.722111	-0.672744	-0.668806	-0.199992	-0.216475	-0.319444	-0.225511	0.262774	-0.18758	-0.127468	0.530084	0.120856	0.769563	0.800613	0.913254	-0.0885628	-0.190397	0.619186	0.923192	1	0.0664671	-0.24818
HGC	0.556601	0.588665	0.57038	0.539542	0.492078	0.496914	0.498853	0.509678	0.496167	0.471847	0.473978	0.474651	0.0662739	0.465496	0.335162	0.235702	0.370416	0.376423	0.591488	0.671437	0.548485	0.149329	0.0667407	-0.577363	-0.700107	0.150014	0.109041	-0.403727	-0.374935	0.0651013	0.936965	0.808492	-0.502384	-0.162853	0.0664671	1	0.793954
GLN	0.810081	0.817718	0.797691	0.828638	0.767045	0.736432	0.742949	0.722194	0.742046	0.691439	0.692736	0.674367	0.529635	0.699758	0.656337	0.630881	0.717136	0.724384	0.705769	0.705566	0.78708	0.284788	-0.255741	-0.176298	-0.312754	-0.299294	-0.161451	-0.739766	-0.717772	-0.152742	0.757122	0.940465	-0.676346	-0.492023	-0.24818	0.793954	1

## Sheet: ICA, site 2
Pearson's r	H	L_max	H_max	D_max	H_b	A	A_CH	A_MBS	A_closed	V	V_CH	V_MBS	D_neck,min	D_neck,max	P_neck	D_neck,equiv	A_neck	A_neck,elliptical	AR	eAR	BF	BL	NSI	AVSV	AASA	UI	EI	MAA	absMAA	MSD	HMC	MLN	GAA	absGAA	GSD	HGC	GLN
H	1	0.951471	0.983412	0.937343	0.9651	0.926105	0.929374	0.930622	0.928771	0.865587	0.866754	0.879171	0.682492	0.786765	0.769051	0.716762	0.783253	0.786441	0.566377	0.760194	0.541969	0.519761	-0.532154	0.434343	0.357126	-0.451299	-0.560377	-0.819893	-0.8221	-0.643789	0.286474	0.785151	-0.653847	-0.720097	-0.670865	0.359702	0.853056
L_max	0.951471	1	0.986016	0.990891	0.898832	0.92638	0.93479	0.958045	0.933531	0.868368	0.869851	0.893329	0.76748	0.909298	0.891825	0.830574	0.876631	0.872405	0.360218	0.591983	0.446549	0.41264	-0.344034	0.217222	0.116984	-0.282774	-0.364888	-0.840087	-0.85245	-0.671017	0.437645	0.715877	-0.67723	-0.775051	-0.707743	0.445809	0.801467
H_max	0.983412	0.986016	1	0.972554	0.946239	0.924797	0.930562	0.945661	0.929435	0.863007	0.864473	0.8837	0.706593	0.846446	0.826727	0.762994	0.823191	0.820719	0.494291	0.707345	0.534664	0.49373	-0.429848	0.307363	0.212819	-0.349659	-0.458888	-0.83978	-0.852344	-0.682687	0.399649	0.764782	-0.683848	-0.767642	-0.707508	0.428345	0.830609
D_max	0.937343	0.990891	0.972554	1	0.90166	0.933518	0.941465	0.960141	0.940366	0.879571	0.880901	0.901293	0.750162	0.914258	0.894952	0.825308	0.87597	0.867878	0.323942	0.564193	0.45227	0.428063	-0.35597	0.251424	0.150327	-0.296794	-0.371373	-0.827599	-0.843386	-0.687123	0.391476	0.678638	-0.658421	-0.772875	-0.724121	0.383304	0.766901
H_b	0.9651	0.898832	0.946239	0.90166	1	0.901394	0.900107	0.889318	0.899657	0.849499	0.850514	0.853199	0.542982	0.69528	0.673709	0.593619	0.67239	0.668141	0.620278	0.810329	0.645717	0.66631	-0.545662	0.483102	0.406979	-0.450369	-0.57875	-0.784193	-0.794667	-0.658064	0.232244	0.750719	-0.633493	-0.712732	-0.679877	0.286862	0.798962
A	0.926105	0.92638	0.924797	0.933518	0.901394	1	0.999479	0.992775	0.99954	0.988356	0.988715	0.992456	0.603542	0.818223	0.779231	0.68043	0.776393	0.7749	0.310985	0.575031	0.352925	0.336662	-0.368766	0.35348	0.286401	-0.337876	-0.376078	-0.64819	-0.659739	-0.553582	0.18193	0.572945	-0.44931	-0.556338	-0.552212	0.216058	0.717862
A_CH	0.929374	0.93479	0.930562	0.941465	0.900107	0.999479	1	0.995183	0.999987	0.984548	0.984975	0.990213	0.626084	0.835381	0.798101	0.702822	0.796113	0.794437	0.301433	0.565703	0.345852	0.333309	-0.365762	0.346672	0.277806	-0.334526	-0.37323	-0.661112	-0.672897	-0.562686	0.192469	0.576707	-0.461152	-0.569615	-0.562227	0.226257	0.723279
A_MBS	0.930622	0.958045	0.945661	0.960141	0.889318	0.992775	0.995183	1	0.99486	0.972013	0.972652	0.983637	0.6621	0.865383	0.829969	0.739212	0.82359	0.821939	0.286905	0.551831	0.350575	0.317668	-0.332282	0.284132	0.20619	-0.299998	-0.340436	-0.688463	-0.701711	-0.580969	0.267053	0.59589	-0.49338	-0.605557	-0.587216	0.284461	0.733794
A_closed	0.928771	0.933531	0.929435	0.940366	0.899657	0.99954	0.999987	0.99486	1	0.984917	0.985323	0.990396	0.62487	0.834119	0.796726	0.701546	0.795157	0.793538	0.301009	0.565177	0.344681	0.33261	-0.367508	0.349157	0.280509	-0.337369	-0.374267	-0.659267	-0.671067	-0.561652	0.18847	0.574795	-0.458789	-0.567667	-0.561457	0.22212	0.721222
V	0.865587	0.868368	0.863007	0.879571	0.849499	0.988356	0.984548	0.972013	0.984917	1	0.999989	0.997869	0.511152	0.763071	0.714143	0.597529	0.705365	0.703943	0.246149	0.522206	0.289969	0.266641	-0.308276	0.324955	0.26739	-0.29142	-0.310848	-0.544414	-0.5574	-0.481865	0.130635	0.485529	-0.349949	-0.454183	-0.464661	0.159884	0.649689
V_CH	0.866754	0.869851	0.864473	0.880901	0.850514	0.988715	0.984975	0.972652	0.985323	0.999989	1	0.998011	0.51265	0.76448	0.715712	0.599064	0.706624	0.70512	0.246996	0.523209	0.291145	0.267827	-0.307524	0.323675	0.266032	-0.289495	-0.310955	-0.546501	-0.559345	-0.482792	0.133972	0.488042	-0.352273	-0.456014	-0.465334	0.163699	0.652363
V_MBS	0.879171	0.893329	0.8837	0.901293	0.853199	0.992456	0.990213	0.983637	0.990396	0.997869	0.998011	1	0.549874	0.79263	0.74589	0.634762	0.737225	0.736265	0.244293	0.520718	0.296536	0.264179	-0.301568	0.299166	0.235948	-0.282935	-0.304969	-0.573723	-0.586853	-0.50156	0.174499	0.508645	-0.378264	-0.485897	-0.489841	0.196427	0.667846
D_neck,min	0.682492	0.76748	0.706593	0.750162	0.542982	0.603542	0.626084	0.6621	0.62487	0.511152	0.51265	0.549874	1	0.860732	0.896901	0.965415	0.91741	0.928656	0.044695	0.165468	0.0772182	0.158083	-0.268472	0.162044	0.0863079	-0.250669	-0.268948	-0.782886	-0.768338	-0.509459	0.306176	0.529546	-0.626144	-0.692685	-0.592167	0.375509	0.644446
D_neck,max	0.786765	0.909298	0.846446	0.914258	0.69528	0.818223	0.835381	0.865383	0.834119	0.763071	0.76448	0.79263	0.860732	1	0.993245	0.950589	0.973307	0.958563	-0.0039458	0.244657	0.108159	0.178564	-0.188338	0.110768	0.0153262	-0.174039	-0.18662	-0.751618	-0.772182	-0.626993	0.351449	0.474704	-0.578087	-0.701265	-0.642333	0.344711	0.62524
P_neck	0.769051	0.891825	0.826727	0.894952	0.673709	0.779231	0.798101	0.829969	0.796726	0.714143	0.715712	0.74589	0.896901	0.993245	1	0.970877	0.975879	0.960517	-0.0134487	0.217646	0.0936194	0.182004	-0.182511	0.105867	0.0146522	-0.167679	-0.180728	-0.777209	-0.795238	-0.627391	0.343636	0.475027	-0.604194	-0.727888	-0.652197	0.349226	0.625562
D_neck,equiv	0.716762	0.830574	0.762994	0.825308	0.593619	0.68043	0.702822	0.739212	0.701546	0.597529	0.599064	0.634762	0.965415	0.950589	0.970877	1	0.973437	0.967135	-0.0123116	0.162869	0.0642378	0.154003	-0.233835	0.136028	0.0476249	-0.225667	-0.22973	-0.784176	-0.787166	-0.572683	0.321573	0.489326	-0.618151	-0.711314	-0.630169	0.353286	0.612778
A_neck	0.783253	0.876631	0.823191	0.87597	0.67239	0.776393	0.796113	0.82359	0.795157	0.705365	0.706624	0.737225	0.91741	0.973307	0.975879	0.973437	1	0.996211	0.0372021	0.247248	0.10612	0.180431	-0.263701	0.188025	0.102711	-0.255026	-0.257949	-0.739567	-0.753841	-0.602736	0.278848	0.488724	-0.55006	-0.672606	-0.62605	0.295725	0.633999
A_neck,elliptical	0.786441	0.872405	0.820719	0.867878	0.668141	0.7749	0.794437	0.821939	0.793538	0.703943	0.70512	0.736265	0.928656	0.958563	0.960517	0.967135	0.996211	1	0.0567652	0.257938	0.114737	0.176228	-0.275362	0.194018	0.110682	-0.264096	-0.271028	-0.732457	-0.741574	-0.581993	0.282918	0.505767	-0.543259	-0.658041	-0.61024	0.305757	0.652075
AR	0.566377	0.360218	0.494291	0.323942	0.620278	0.310985	0.301433	0.286905	0.301009	0.246149	0.246996	0.244293	0.044695	-0.0039458	-0.0134487	-0.0123116	0.0372021	0.0567652	1	0.943574	0.854052	0.682186	-0.597657	0.452794	0.415622	-0.462262	-0.648134	-0.465111	-0.458844	-0.346368	0.195126	0.721822	-0.482078	-0.418952	-0.378256	0.289736	0.5714
eAR	0.760194	0.591983	0.707345	0.564193	0.810329	0.575031	0.565703	0.551831	0.565177	0.522206	0.523209	0.520718	0.165468	0.244657	0.217646	0.162869	0.247248	0.257938	0.943574	1	0.847956	0.704548	-0.585435	0.445675	0.394002	-0.449894	-0.639594	-0.583777	-0.585076	-0.468768	0.268437	0.791709	-0.553937	-0.530634	-0.486786	0.339317	0.700182
BF	0.541969	0.446549	0.534664	0.45227	0.645717	0.352925	0.345852	0.350575	0.344681	0.289969	0.291145	0.296536	0.0772182	0.108159	0.0936194	0.0642378	0.10612	0.114737	0.854052	0.847956	1	0.759242	-0.417767	0.245272	0.177982	-0.27385	-0.47196	-0.543392	-0.547313	-0.428912	0.379258	0.691337	-0.574448	-0.564558	-0.51215	0.349046	0.521326
BL	0.519761	0.41264	0.49373	0.428063	0.66631	0.336662	0.333309	0.317668	0.33261	0.266641	0.267827	0.264179	0.158083	0.178564	0.182004	0.154003	0.180431	0.176228	0.682186	0.704548	0.759242	1	-0.59725	0.49985	0.425773	-0.434887	-0.651382	-0.570705	-0.579878	-0.528876	0.203466	0.646609	-0.58006	-0.598013	-0.5782	0.211622	0.498908
NSI	-0.532154	-0.344034	-0.429848	-0.35597	-0.545662	-0.368766	-0.365762	-0.332282	-0.367508	-0.308276	-0.307524	-0.301568	-0.268472	-0.188338	-0.182511	-0.233835	-0.263701	-0.275362	-0.597657	-0.585435	-0.417767	-0.59725	1	-0.903427	-0.839539	0.94303	0.96911	0.406753	0.414944	0.50244	0.239346	-0.506349	0.304338	0.357476	0.524167	0.169133	-0.370505
AVSV	0.434343	0.217222	0.307363	0.251424	0.483102	0.35348	0.346672	0.284132	0.349157	0.324955	0.323675	0.299166	0.162044	0.110768	0.105867	0.136028	0.188025	0.194018	0.452794	0.445675	0.245272	0.49985	-0.903427	1	0.979485	-0.862666	-0.878392	-0.227663	-0.236897	-0.369404	-0.521125	0.285492	-0.0949592	-0.145964	-0.32792	-0.382973	0.26101
AASA	0.357126	0.116984	0.212819	0.150327	0.406979	0.286401	0.277806	0.20619	0.280509	0.26739	0.266032	0.235948	0.0863079	0.0153262	0.0146522	0.0476249	0.102711	0.110682	0.415622	0.394002	0.177982	0.425773	-0.839539	0.979485	1	-0.801072	-0.826502	-0.138576	-0.12755	-0.225318	-0.612077	0.216031	-0.00987596	-0.026825	-0.193622	-0.441751	0.213424
UI	-0.451299	-0.282774	-0.349659	-0.296794	-0.450369	-0.337876	-0.334526	-0.299998	-0.337369	-0.29142	-0.289495	-0.282935	-0.250669	-0.174039	-0.167679	-0.225667	-0.255026	-0.264096	-0.462262	-0.449894	-0.27385	-0.434887	0.94303	-0.862666	-0.801072	1	0.843043	0.308649	0.329792	0.458972	0.389607	-0.322575	0.171939	0.289244	0.508737	0.367743	-0.187666
EI	-0.560377	-0.364888	-0.458888	-0.371373	-0.57875	-0.376078	-0.37323	-0.340436	-0.374267	-0.310848	-0.310955	-0.304969	-0.268948	-0.18662	-0.180728	-0.22973	-0.257949	-0.271028	-0.648134	-0.639594	-0.47196	-0.651382	0.96911	-0.878392	-0.826502	0.843043	1	0.439549	0.42407	0.439491	0.124745	-0.61488	0.356213	0.344334	0.452455	0.0175103	-0.48997
MAA	-0.819893	-0.840087	-0.83978	-0.827599	-0.784193	-0.64819	-0.661112	-0.688463	-0.659267	-0.544414	-0.546501	-0.573723	-0.782886	-0.751618	-0.777209	-0.784176	-0.739567	-0.732457	-0.465111	-0.583777	-0.543392	-0.570705	0.406753	-0.227663	-0.138576	0.308649	0.439549	1	0.98183	0.640863	-0.453889	-0.777973	0.942472	0.935686	0.776451	-0.513742	-0.767673
absMAA	-0.8221	-0.85245	-0.852344	-0.843386	-0.794667	-0.659739	-0.672897	-0.701711	-0.671067	-0.5574	-0.559345	-0.586853	-0.768338	-0.772182	-0.795238	-0.787166	-0.753841	-0.741574	-0.458844	-0.585076	-0.547313	-0.579878	0.414944	-0.236897	-0.12755	0.329792	0.42407	0.98183	1	0.759042	-0.429765	-0.725123	0.917764	0.971509	0.85195	-0.464392	-0.717156
MSD	-0.643789	-0.671017	-0.682687	-0.687123	-0.658064	-0.553582	-0.562686	-0.580969	-0.561652	-0.481865	-0.482792	-0.50156	-0.509459	-0.626993	-0.627391	-0.572683	-0.602736	-0.581993	-0.346368	-0.468768	-0.428912	-0.528876	0.50244	-0.369404	-0.225318	0.458972	0.439491	0.640863	0.759042	1	-0.179106	-0.397103	0.52977	0.801061	0.924793	-0.109561	-0.384056
HMC	0.286474	0.437645	0.399649	0.391476	0.232244	0.18193	0.192469	0.267053	0.18847	0.130635	0.133972	0.174499	0.306176	0.351449	0.343636	0.321573	0.278848	0.282918	0.195126	0.268437	0.379258	0.203466	0.239346	-0.521125	-0.612077	0.389607	0.124745	-0.453889	-0.429765	-0.179106	1	0.595951	-0.540764	-0.454973	-0.225428	0.91412	0.520804
MLN	0.785151	0.715877	0.764782	0.678638	0.750719	0.572945	0.576707	0.59589	0.574795	0.485529	0.488042	0.508645	0.529546	0.474704	0.475027	0.489326	0.488724	0.505767	0.721822	0.791709	0.691337	0.646609	-0.506349	0.285492	0.216031	-0.322575	-0.61488	-0.777973	-0.725123	-0.397103	0.595951	1	-0.745648	-0.645028	-0.481448	0.69194	0.916124
GAA	-0.653847	-0.67723	-0.683848	-0.658421	-0.633493	-0.44931	-0.461152	-0.49338	-0.458789	-0.349949	-0.352273	-0.378264	-0.626144	-0.578087	-0.604194	-0.618151	-0.55006	-0.543259	-0.482078	-0.553937	-0.574448	-0.58006	0.304338	-0.0949592	-0.00987596	0.171939	0.356213	0.942472	0.917764	0.52977	-0.540764	-0.745648	1	0.893616	0.67461	-0.605144	-0.683051
absGAA	-0.720097	-0.775051	-0.767642	-0.772875	-0.712732	-0.556338	-0.569615	-0.605557	-0.567667	-0.454183	-0.456014	-0.485897	-0.692685	-0.701265	-0.727888	-0.711314	-0.672606	-0.658041	-0.418952	-0.530634	-0.564558	-0.598013	0.357476	-0.145964	-0.026825	0.289244	0.344334	0.935686	0.971509	0.801061	-0.454973	-0.645028	0.893616	1	0.90528	-0.421704	-0.598363
GSD	-0.670865	-0.707743	-0.707508	-0.724121	-0.679877	-0.552212	-0.562227	-0.587216	-0.561457	-0.464661	-0.465334	-0.489841	-0.592167	-0.642333	-0.652197	-0.630169	-0.62605	-0.61024	-0.378256	-0.486786	-0.51215	-0.5782	0.524167	-0.32792	-0.193622	0.508737	0.452455	0.776451	0.85195	0.924793	-0.225428	-0.481448	0.67461	0.90528	1	-0.12205	-0.397553
HGC	0.359702	0.445809	0.428345	0.383304	0.286862	0.216058	0.226257	0.284461	0.22212	0.159884	0.163699	0.196427	0.375509	0.344711	0.349226	0.353286	0.295725	0.305757	0.289736	0.339317	0.349046	0.211622	0.169133	-0.382973	-0.441751	0.367743	0.0175103	-0.513742	-0.464392	-0.109561	0.91412	0.69194	-0.605144	-0.421704	-0.12205	1	0.69452
GLN	0.853056	0.801467	0.830609	0.766901	0.798962	0.717862	0.723279	0.733794	0.721222	0.649689	0.652363	0.667846	0.644446	0.62524	0.625562	0.612778	0.633999	0.652075	0.5714	0.700182	0.521326	0.498908	-0.370505	0.26101	0.213424	-0.187666	-0.48997	-0.767673	-0.717156	-0.384056	0.520804	0.916124	-0.683051	-0.598363	-0.397553	0.69452	1

## Sheet: MCA, site 2
Pearson's r	H	L_max	H_max	D_max	H_b	A	A_CH	A_MBS	A_closed	V	V_CH	V_MBS	D_neck,min	D_neck,max	P_neck	D_neck,equiv	A_neck	A_neck,elliptical	AR	eAR	BF	BL	NSI	AVSV	AASA	UI	EI	MAA	absMAA	MSD	HMC	MLN	GAA	absGAA	GSD	HGC	GLN
H	1	0.920405	0.985785	0.808298	0.801838	0.888427	0.87142	0.83609	0.875622	0.821259	0.799894	0.729599	0.697546	0.617718	0.62779	0.693712	0.59536	0.602046	0.765563	0.861416	0.581226	0.391667	-0.481685	0.35804	0.253225	-0.282868	-0.608546	-0.790455	-0.799784	-0.463575	0.533413	0.72557	-0.645938	-0.693018	-0.346961	0.488329	0.315907
L_max	0.920405	1	0.954644	0.937239	0.651828	0.948826	0.953693	0.953825	0.952149	0.890025	0.899102	0.873216	0.807504	0.824124	0.841734	0.857706	0.811246	0.796154	0.504144	0.642583	0.474476	0.295165	-0.306723	0.206067	0.11827	-0.101036	-0.527723	-0.795667	-0.792609	-0.38368	0.726109	0.821728	-0.649171	-0.689777	-0.388548	0.682655	0.305176
H_max	0.985785	0.954644	1	0.846298	0.782438	0.910142	0.89922	0.881238	0.901664	0.84724	0.833053	0.784426	0.735189	0.672336	0.68497	0.742846	0.657809	0.659997	0.701401	0.807965	0.567646	0.394873	-0.433059	0.296988	0.191552	-0.228746	-0.584406	-0.797146	-0.803469	-0.443392	0.603346	0.754939	-0.652887	-0.694615	-0.367259	0.5546	0.297103
D_max	0.808298	0.937239	0.846298	1	0.532082	0.92331	0.930337	0.891305	0.931415	0.866571	0.875041	0.806188	0.81094	0.849124	0.876027	0.881227	0.839703	0.81066	0.344135	0.483652	0.535092	0.241554	-0.29992	0.339756	0.289569	-0.0828434	-0.575558	-0.761686	-0.748803	-0.294152	0.680887	0.856231	-0.613737	-0.645906	-0.317043	0.681129	0.380606
H_b	0.801838	0.651828	0.782438	0.532082	1	0.61919	0.591522	0.534767	0.602682	0.567039	0.513938	0.415651	0.422687	0.376761	0.357985	0.436395	0.336691	0.355424	0.724832	0.796409	0.500099	0.782033	-0.507263	0.357681	0.254214	-0.33936	-0.569424	-0.60759	-0.635231	-0.512397	0.242161	0.409123	-0.495121	-0.545309	-0.337149	0.16911	0.11303
A	0.888427	0.948826	0.910142	0.92331	0.61919	1	0.997182	0.961767	0.99832	0.982877	0.979836	0.908334	0.727885	0.796596	0.802133	0.79833	0.801527	0.787889	0.436207	0.585737	0.450831	0.220257	-0.304568	0.332225	0.272017	-0.106092	-0.509638	-0.643163	-0.646374	-0.394323	0.570261	0.735424	-0.461675	-0.534402	-0.321797	0.563166	0.319197
A_CH	0.87142	0.953693	0.89922	0.930337	0.591522	0.997182	1	0.973383	0.999344	0.980004	0.984525	0.92602	0.753538	0.831755	0.836884	0.826848	0.838874	0.825224	0.391101	0.544183	0.410171	0.202057	-0.265941	0.298198	0.243542	-0.0654528	-0.48445	-0.640889	-0.642169	-0.37803	0.597634	0.745083	-0.46206	-0.532034	-0.32289	0.592722	0.318548
A_MBS	0.83609	0.953825	0.881238	0.891305	0.534767	0.961767	0.973383	1	0.96614	0.938954	0.966824	0.977599	0.722471	0.819015	0.827666	0.800794	0.83269	0.812672	0.349256	0.505233	0.342421	0.161933	-0.128964	0.0977879	0.0437464	0.0514221	-0.351885	-0.600883	-0.600019	-0.336858	0.697649	0.741889	-0.438914	-0.499736	-0.327236	0.675029	0.287173
A_closed	0.875622	0.952149	0.901664	0.931415	0.602682	0.99832	0.999344	0.96614	1	0.981902	0.98192	0.91422	0.754522	0.828061	0.833549	0.827322	0.83483	0.821329	0.401242	0.552501	0.420729	0.211797	-0.291181	0.324247	0.267169	-0.0920967	-0.504743	-0.647575	-0.64924	-0.387338	0.58154	0.740331	-0.466437	-0.53854	-0.324921	0.575832	0.317691
V	0.821259	0.890025	0.84724	0.866571	0.567039	0.982877	0.980004	0.938954	0.981902	1	0.990948	0.910365	0.675407	0.781888	0.775315	0.758503	0.794791	0.786038	0.34251	0.49946	0.3588	0.161767	-0.268318	0.333121	0.280853	-0.0886686	-0.448486	-0.539064	-0.54591	-0.388311	0.482372	0.637261	-0.354105	-0.439328	-0.297732	0.483914	0.271009
V_CH	0.799894	0.899102	0.833053	0.875041	0.513938	0.979836	0.984525	0.966824	0.98192	0.990948	1	0.952741	0.681595	0.807158	0.80249	0.770797	0.82385	0.810687	0.293924	0.455811	0.323115	0.121326	-0.179923	0.24654	0.205839	0.00119399	-0.385557	-0.520921	-0.524356	-0.348908	0.550035	0.667563	-0.342044	-0.420324	-0.285438	0.554979	0.287926
V_MBS	0.729599	0.873216	0.784426	0.806188	0.415651	0.908334	0.92602	0.977599	0.91422	0.910365	0.952741	1	0.637422	0.775942	0.77714	0.726214	0.804546	0.784676	0.221658	0.379513	0.226727	0.0566138	0.00306735	-0.00292101	-0.0346271	0.156911	-0.20902	-0.454208	-0.453578	-0.27656	0.661839	0.656263	-0.301546	-0.364708	-0.264719	0.651979	0.26227
D_neck,min	0.697546	0.807504	0.735189	0.81094	0.422687	0.727885	0.753538	0.722471	0.754522	0.675407	0.681595	0.637422	1	0.86268	0.896683	0.96109	0.87091	0.885367	0.253253	0.323873	0.242578	0.105419	-0.337562	0.335923	0.286104	-0.176995	-0.509452	-0.800304	-0.787489	-0.303634	0.542174	0.7081	-0.69512	-0.724367	-0.305745	0.5425	0.295539
D_neck,max	0.617718	0.824124	0.672336	0.849124	0.376761	0.796596	0.831755	0.819015	0.828061	0.781888	0.807158	0.775942	0.86268	1	0.983285	0.953011	0.976984	0.977099	0.0158821	0.184712	0.0496698	0.145051	-0.155092	0.194247	0.158281	0.0271928	-0.399711	-0.642843	-0.634564	-0.292415	0.585183	0.657988	-0.514921	-0.563577	-0.326505	0.581542	0.244865
P_neck	0.62779	0.841734	0.68497	0.876027	0.357985	0.802133	0.836884	0.827666	0.833549	0.775315	0.80249	0.77714	0.896683	0.983285	1	0.971927	0.981018	0.964706	0.0377706	0.186885	0.108918	0.112204	-0.149248	0.194201	0.163516	0.0336334	-0.413225	-0.669289	-0.656846	-0.284984	0.623837	0.698453	-0.537336	-0.587067	-0.348654	0.6228	0.250602
D_neck,equiv	0.693712	0.857706	0.742846	0.881227	0.436395	0.79833	0.826848	0.800794	0.827322	0.758503	0.770797	0.726214	0.96109	0.953011	0.971927	1	0.952893	0.948136	0.165882	0.27987	0.20171	0.159294	-0.282614	0.299235	0.251759	-0.11132	-0.506682	-0.766332	-0.753418	-0.312268	0.596937	0.727357	-0.642112	-0.682344	-0.333317	0.589666	0.290415
A_neck	0.59536	0.811246	0.657809	0.839703	0.336691	0.801527	0.838874	0.83269	0.83483	0.794791	0.82385	0.804546	0.87091	0.976984	0.981018	0.952893	1	0.990249	-0.00361074	0.136676	0.0585473	0.0930603	-0.111261	0.18973	0.172718	0.057547	-0.366822	-0.572186	-0.558868	-0.250818	0.58336	0.65285	-0.427197	-0.480295	-0.295752	0.591868	0.245847
A_neck,elliptical	0.602046	0.796154	0.659997	0.81066	0.355424	0.787889	0.825224	0.812672	0.821329	0.786038	0.810687	0.784676	0.885367	0.977099	0.964706	0.948136	0.990249	1	0.0115542	0.151687	0.0312661	0.100489	-0.142837	0.214166	0.192411	0.0269019	-0.370648	-0.579271	-0.568859	-0.262879	0.540875	0.625885	-0.439696	-0.490712	-0.284788	0.550731	0.239952
AR	0.765563	0.504144	0.701401	0.344135	0.724832	0.436207	0.391101	0.349256	0.401242	0.34251	0.293924	0.221658	0.253253	0.0158821	0.0377706	0.165882	-0.00361074	0.0115542	1	0.964662	0.717531	0.43498	-0.548446	0.324876	0.212325	-0.439494	-0.522646	-0.591503	-0.605437	-0.359153	0.238446	0.430934	-0.538632	-0.536997	-0.188671	0.17197	0.224855
eAR	0.861416	0.642583	0.807965	0.483652	0.796409	0.585737	0.544183	0.505233	0.552501	0.49946	0.455811	0.379513	0.323873	0.184712	0.186885	0.27987	0.136676	0.151687	0.964662	1	0.693914	0.47853	-0.537844	0.308844	0.185179	-0.383397	-0.55986	-0.658477	-0.675127	-0.414148	0.336124	0.513497	-0.580803	-0.592528	-0.261067	0.264007	0.23248
BF	0.581226	0.474476	0.567646	0.535092	0.500099	0.450831	0.410171	0.342421	0.420729	0.3588	0.323115	0.226727	0.242578	0.0496698	0.108918	0.20171	0.0585473	0.0312661	0.717531	0.693914	1	0.347299	-0.432005	0.405228	0.353934	-0.286468	-0.563757	-0.542869	-0.527884	-0.101781	0.358354	0.604838	-0.494617	-0.445665	-0.08439	0.356706	0.343171
BL	0.391667	0.295165	0.394873	0.241554	0.782033	0.220257	0.202057	0.161933	0.211797	0.161767	0.121326	0.0566138	0.105419	0.145051	0.112204	0.159294	0.0930603	0.100489	0.43498	0.47853	0.347299	1	-0.384302	0.210316	0.125283	-0.198452	-0.51182	-0.329325	-0.347668	-0.196961	0.132801	0.222483	-0.273793	-0.24426	-0.183824	0.0702929	0.00114869
NSI	-0.481685	-0.306723	-0.433059	-0.29992	-0.507263	-0.304568	-0.265941	-0.128964	-0.291181	-0.268318	-0.179923	0.00306735	-0.337562	-0.155092	-0.149248	-0.282614	-0.111261	-0.142837	-0.548446	-0.537844	-0.432005	-0.384302	1	-0.802969	-0.668222	0.916342	0.872866	0.534452	0.551042	0.37534	0.164449	-0.206887	0.454919	0.506436	0.119198	0.207199	-0.151673
AVSV	0.35804	0.206067	0.296988	0.339756	0.357681	0.332225	0.298198	0.0977879	0.324247	0.333121	0.24654	-0.00292101	0.335923	0.194247	0.194201	0.299235	0.18973	0.214166	0.324876	0.308844	0.405228	0.210316	-0.802969	1	0.975052	-0.702602	-0.781503	-0.356733	-0.36277	-0.256082	-0.304885	0.211228	-0.260753	-0.311877	0.0711106	-0.228776	0.335518
AASA	0.253225	0.11827	0.191552	0.289569	0.254214	0.272017	0.243542	0.0437464	0.267169	0.280853	0.205839	-0.0346271	0.286104	0.158281	0.163516	0.251759	0.172718	0.192411	0.212325	0.185179	0.353934	0.125283	-0.668222	0.975052	1	-0.584961	-0.675107	-0.244473	-0.245289	-0.191167	-0.35082	0.167541	-0.153319	-0.206487	0.124268	-0.246946	0.342772
UI	-0.282868	-0.101036	-0.228746	-0.0828434	-0.33936	-0.106092	-0.0654528	0.0514221	-0.0920967	-0.0886686	0.00119399	0.156911	-0.176995	0.0271928	0.0336334	-0.11132	0.057547	0.0269019	-0.439494	-0.383397	-0.286468	-0.198452	0.916342	-0.702602	-0.584961	1	0.644838	0.368258	0.387425	0.387253	0.339946	0.0307814	0.317553	0.405187	0.077477	0.413718	-0.0533434
EI	-0.608546	-0.527723	-0.584406	-0.575558	-0.569424	-0.509638	-0.48445	-0.351885	-0.504743	-0.448486	-0.385557	-0.20902	-0.509452	-0.399711	-0.413225	-0.506682	-0.366822	-0.370648	-0.522646	-0.55986	-0.563757	-0.51182	0.872866	-0.781503	-0.675107	0.644838	1	0.657116	0.65245	0.228552	-0.160084	-0.535566	0.548913	0.542683	0.116894	-0.15703	-0.302442
MAA	-0.790455	-0.795667	-0.797146	-0.761686	-0.60759	-0.643163	-0.640889	-0.600883	-0.647575	-0.539064	-0.520921	-0.454208	-0.800304	-0.642843	-0.669289	-0.766332	-0.572186	-0.579271	-0.591503	-0.658477	-0.542869	-0.329325	0.534452	-0.356733	-0.244473	0.368258	0.657116	1	0.994599	0.416994	-0.556493	-0.734024	0.96166	0.960705	0.378341	-0.498003	-0.309797
absMAA	-0.799784	-0.792609	-0.803469	-0.748803	-0.635231	-0.646374	-0.642169	-0.600019	-0.64924	-0.54591	-0.524356	-0.453578	-0.787489	-0.634564	-0.656846	-0.753418	-0.558868	-0.568859	-0.605437	-0.675127	-0.527884	-0.347668	0.551042	-0.36277	-0.245289	0.387425	0.65245	0.994599	1	0.495874	-0.509848	-0.687552	0.954699	0.971595	0.419421	-0.445806	-0.268144
MSD	-0.463575	-0.38368	-0.443392	-0.294152	-0.512397	-0.394323	-0.37803	-0.336858	-0.387338	-0.388311	-0.348908	-0.27656	-0.303634	-0.292415	-0.284984	-0.312268	-0.250818	-0.262879	-0.359153	-0.414148	-0.101781	-0.196961	0.37534	-0.256082	-0.191167	0.387253	0.228552	0.416994	0.495874	1	0.170268	0.0929818	0.339881	0.565633	0.660856	0.27521	0.281234
HMC	0.533413	0.726109	0.603346	0.680887	0.242161	0.570261	0.597634	0.697649	0.58154	0.482372	0.550035	0.661839	0.542174	0.585183	0.623837	0.596937	0.58336	0.540875	0.238446	0.336124	0.358354	0.132801	0.164449	-0.304885	-0.35082	0.339946	-0.160084	-0.556493	-0.509848	0.170268	1	0.848865	-0.527847	-0.422831	-0.147462	0.965275	0.320692
MLN	0.72557	0.821728	0.754939	0.856231	0.409123	0.735424	0.745083	0.741889	0.740331	0.637261	0.667563	0.656263	0.7081	0.657988	0.698453	0.727357	0.65285	0.625885	0.430934	0.513497	0.604838	0.222483	-0.206887	0.211228	0.167541	0.0307814	-0.535566	-0.734024	-0.687552	0.0929818	0.848865	1	-0.659946	-0.564246	-0.0227352	0.884448	0.602317
GAA	-0.645938	-0.649171	-0.652887	-0.613737	-0.495121	-0.461675	-0.46206	-0.438914	-0.466437	-0.354105	-0.342044	-0.301546	-0.69512	-0.514921	-0.537336	-0.642112	-0.427197	-0.439696	-0.538632	-0.580803	-0.494617	-0.273793	0.454919	-0.260753	-0.153319	0.317553	0.548913	0.96166	0.954699	0.339881	-0.527847	-0.659946	1	0.957792	0.300829	-0.475188	-0.309733
absGAA	-0.693018	-0.689777	-0.694615	-0.645906	-0.545309	-0.534402	-0.532034	-0.499736	-0.53854	-0.439328	-0.420324	-0.364708	-0.724367	-0.563577	-0.587067	-0.682344	-0.480295	-0.490712	-0.536997	-0.592528	-0.445665	-0.24426	0.506436	-0.311877	-0.206487	0.405187	0.542683	0.960705	0.971595	0.565633	-0.422831	-0.564246	0.957792	1	0.47676	-0.341661	-0.177085
GSD	-0.346961	-0.388548	-0.367259	-0.317043	-0.337149	-0.321797	-0.32289	-0.327236	-0.324921	-0.297732	-0.285438	-0.264719	-0.305745	-0.326505	-0.348654	-0.333317	-0.295752	-0.284788	-0.188671	-0.261067	-0.08439	-0.183824	0.119198	0.0711106	0.124268	0.077477	0.116894	0.378341	0.419421	0.660856	-0.147462	-0.0227352	0.300829	0.47676	1	0.0225209	0.672239
HGC	0.488329	0.682655	0.5546	0.681129	0.16911	0.563166	0.592722	0.675029	0.575832	0.483914	0.554979	0.651979	0.5425	0.581542	0.6228	0.589666	0.591868	0.550731	0.17197	0.264007	0.356706	0.0702929	0.207199	-0.228776	-0.246946	0.413718	-0.15703	-0.498003	-0.445806	0.27521	0.965275	0.884448	-0.475188	-0.341661	0.0225209	1	0.483861
GLN	0.315907	0.305176	0.297103	0.380606	0.11303	0.319197	0.318548	0.287173	0.317691	0.271009	0.287926	0.26227	0.295539	0.244865	0.250602	0.290415	0.245847	0.239952	0.224855	0.23248	0.343171	0.00114869	-0.151673	0.335518	0.342772	-0.0533434	-0.302442	-0.309797	-0.268144	0.281234	0.320692	0.602317	-0.309733	-0.177085	0.672239	0.483861	1

## Sheet: posterior region, site 2
Pearson's r	H	L_max	H_max	D_max	H_b	A	A_CH	A_MBS	A_closed	V	V_CH	V_MBS	D_neck,min	D_neck,max	P_neck	D_neck,equiv	A_neck	A_neck,elliptical	AR	eAR	BF	BL	NSI	AVSV	AASA	UI	EI	MAA	absMAA	MSD	HMC	MLN	GAA	absGAA	GSD	HGC	GLN
H	1	0.958174	0.989181	0.851092	0.812246	0.878493	0.868854	0.885427	0.866399	0.788765	0.791911	0.798251	0.652035	0.739077	0.713104	0.70691	0.738111	0.749101	0.316983	0.341067	0.185713	0.422145	-0.312833	0.0472207	-0.0700442	-0.257966	-0.303028	-0.885044	-0.885991	-0.630831	0.450578	0.659425	-0.770651	-0.803875	-0.495708	0.562285	0.668276
L_max	0.958174	1	0.96676	0.94684	0.799896	0.947897	0.944793	0.963594	0.942887	0.885144	0.888569	0.899631	0.748812	0.852234	0.833222	0.816344	0.862698	0.865313	0.151679	0.192895	0.121205	0.363173	-0.353679	0.0739178	-0.0443508	-0.275507	-0.376792	-0.873731	-0.869557	-0.618647	0.435704	0.66185	-0.722213	-0.781488	-0.463237	0.59174	0.778417
H_max	0.989181	0.96676	1	0.858106	0.864981	0.880949	0.870101	0.900181	0.867249	0.798253	0.801726	0.819541	0.599585	0.717142	0.684964	0.670136	0.727216	0.732061	0.364926	0.391224	0.27255	0.492109	-0.284079	-0.0344031	-0.155787	-0.243969	-0.252636	-0.864958	-0.858231	-0.574147	0.537819	0.722175	-0.766549	-0.766201	-0.421626	0.655196	0.728564
D_max	0.851092	0.94684	0.858106	1	0.654304	0.957697	0.961215	0.952136	0.960859	0.921722	0.924255	0.914404	0.816954	0.932193	0.913415	0.897132	0.939406	0.941756	-0.0744409	-0.00466271	0.0444252	0.206971	-0.366498	0.255092	0.155604	-0.247116	-0.479113	-0.794991	-0.788664	-0.561791	0.301092	0.596779	-0.599108	-0.698016	-0.413695	0.494725	0.783938
H_b	0.812246	0.799896	0.864981	0.654304	1	0.745444	0.727552	0.792333	0.725925	0.718002	0.718379	0.769602	0.281301	0.51949	0.450884	0.403155	0.550022	0.535917	0.476898	0.506657	0.347881	0.778534	-0.296007	-0.181298	-0.311109	-0.327011	-0.13269	-0.619483	-0.613154	-0.346031	0.592079	0.738189	-0.596084	-0.519436	-0.12491	0.727201	0.816167
A	0.878493	0.947897	0.880949	0.957697	0.745444	1	0.999245	0.991493	0.999247	0.983869	0.984687	0.976805	0.762441	0.935247	0.900334	0.865098	0.947477	0.946862	-0.0453447	0.0340545	-0.0362949	0.260125	-0.414989	0.28095	0.175651	-0.292508	-0.489535	-0.731068	-0.736271	-0.547493	0.23204	0.567934	-0.522268	-0.634893	-0.347445	0.46513	0.846546
A_CH	0.868854	0.944793	0.870101	0.961215	0.727552	0.999245	1	0.990704	0.999879	0.984809	0.986033	0.977557	0.780164	0.946177	0.91493	0.879863	0.958194	0.957203	-0.0737298	0.00595441	-0.0584569	0.235998	-0.407704	0.291483	0.190847	-0.280335	-0.493476	-0.730058	-0.735363	-0.548811	0.217956	0.557589	-0.516721	-0.635406	-0.353958	0.454729	0.844771
A_MBS	0.885427	0.963594	0.900181	0.952136	0.792333	0.991493	0.990704	1	0.989686	0.974128	0.976157	0.983032	0.737678	0.913539	0.880832	0.840542	0.930683	0.925723	0.000535027	0.0701697	0.00270949	0.311791	-0.373322	0.174244	0.0689264	-0.267693	-0.42197	-0.740562	-0.743655	-0.54215	0.311662	0.603215	-0.549661	-0.642592	-0.338976	0.537639	0.87374
A_closed	0.866399	0.942887	0.867249	0.960859	0.725925	0.999247	0.999879	0.989686	1	0.985501	0.986411	0.977076	0.781474	0.947196	0.915568	0.881323	0.959173	0.958399	-0.0777632	0.00217613	-0.0619483	0.23543	-0.418752	0.299684	0.197304	-0.292255	-0.502242	-0.728496	-0.733974	-0.54938	0.211308	0.553374	-0.513788	-0.634535	-0.353657	0.448024	0.843161
V	0.788765	0.885144	0.798253	0.921722	0.718002	0.983869	0.984809	0.974128	0.985501	1	0.999749	0.992054	0.721395	0.936308	0.892632	0.843572	0.95175	0.945619	-0.143757	-0.049303	-0.110311	0.23345	-0.420642	0.318901	0.223043	-0.292786	-0.49528	-0.617707	-0.626866	-0.473712	0.151856	0.510257	-0.397923	-0.522698	-0.249121	0.420475	0.881754
V_CH	0.791911	0.888569	0.801726	0.924255	0.718379	0.984687	0.986033	0.976157	0.986411	0.999749	1	0.993266	0.723675	0.93743	0.895033	0.845104	0.953291	0.946765	-0.140687	-0.046244	-0.106606	0.231505	-0.405233	0.310757	0.218126	-0.275684	-0.486183	-0.621828	-0.629988	-0.471992	0.161195	0.518252	-0.40308	-0.525108	-0.25009	0.429913	0.88512
V_MBS	0.798251	0.899631	0.819541	0.914404	0.769602	0.976805	0.977557	0.983032	0.977076	0.992054	0.993266	1	0.689664	0.912677	0.870123	0.814321	0.933791	0.92286	-0.0895905	-0.00277274	-0.0656149	0.29091	-0.369727	0.218401	0.125663	-0.255703	-0.426497	-0.623966	-0.630079	-0.459365	0.233645	0.555933	-0.422867	-0.52461	-0.231963	0.497377	0.915404
D_neck,min	0.652035	0.748812	0.599585	0.816954	0.281301	0.762441	0.780164	0.737678	0.781474	0.721395	0.723675	0.689664	1	0.90085	0.947159	0.977389	0.884013	0.898268	-0.417849	-0.400925	-0.409238	-0.175494	-0.450438	0.475771	0.404886	-0.307689	-0.599367	-0.748015	-0.773151	-0.706835	-0.107239	0.184144	-0.506529	-0.755982	-0.670036	0.0469949	0.435972
D_neck,max	0.739077	0.852234	0.717142	0.932193	0.51949	0.935247	0.946177	0.913539	0.947196	0.936308	0.93743	0.912677	0.90085	1	0.988392	0.969107	0.990422	0.995026	-0.353129	-0.274877	-0.303117	0.0212276	-0.435915	0.435569	0.357161	-0.29065	-0.564481	-0.687473	-0.705012	-0.589908	0.00635771	0.367813	-0.442996	-0.635079	-0.442783	0.250887	0.732198
P_neck	0.713104	0.833222	0.684964	0.913415	0.450884	0.900334	0.91493	0.880832	0.915568	0.892632	0.895033	0.870123	0.947159	0.988392	1	0.989868	0.984214	0.98812	-0.387567	-0.325229	-0.341507	-0.0575095	-0.418769	0.448551	0.3803	-0.260894	-0.57906	-0.700764	-0.717635	-0.611817	-0.0219479	0.326751	-0.44688	-0.659218	-0.496693	0.206727	0.672665
D_neck,equiv	0.70691	0.816344	0.670136	0.897132	0.403155	0.865098	0.879863	0.840542	0.881323	0.843572	0.845104	0.814321	0.977389	0.969107	0.989868	1	0.958776	0.967552	-0.397188	-0.354283	-0.353889	-0.0875182	-0.459935	0.476464	0.399467	-0.313348	-0.605796	-0.73332	-0.755983	-0.668578	-0.0554825	0.278794	-0.479348	-0.7141	-0.575383	0.144156	0.59079
A_neck	0.738111	0.862698	0.727216	0.939406	0.550022	0.947477	0.958194	0.930683	0.959173	0.95175	0.953291	0.933791	0.884013	0.990422	0.984214	0.958776	1	0.998109	-0.31047	-0.230297	-0.246075	0.0445142	-0.426787	0.422362	0.345999	-0.276881	-0.571601	-0.676005	-0.683232	-0.53769	0.0504016	0.421611	-0.42818	-0.602533	-0.382558	0.30258	0.779434
A_neck,elliptical	0.749101	0.865313	0.732061	0.941756	0.535917	0.946862	0.957203	0.925723	0.958399	0.945619	0.946765	0.92286	0.898268	0.995026	0.98812	0.967552	0.998109	1	-0.314412	-0.234863	-0.257797	0.0327997	-0.441099	0.438148	0.358067	-0.292296	-0.581457	-0.693355	-0.702745	-0.561569	0.0353909	0.406426	-0.445297	-0.624418	-0.41152	0.281163	0.75365
AR	0.316983	0.151679	0.364926	-0.0744409	0.476898	-0.0453447	-0.0737298	0.000535027	-0.0777632	-0.143757	-0.140687	-0.0895905	-0.417849	-0.353129	-0.387567	-0.397188	-0.31047	-0.314412	1	0.977441	0.836685	0.657753	0.201047	-0.56912	-0.611096	0.0568273	0.368123	-0.229709	-0.159421	0.197755	0.761705	0.609996	-0.433912	-0.095974	0.205559	0.621064	0.10214
eAR	0.341067	0.192895	0.391224	-0.00466271	0.506657	0.0340545	0.00595441	0.0701697	0.00217613	-0.049303	-0.046244	-0.00277274	-0.400925	-0.274877	-0.325229	-0.354283	-0.230297	-0.234863	0.977441	1	0.846829	0.663161	0.196851	-0.509808	-0.545283	0.0745759	0.319162	-0.226901	-0.140488	0.273494	0.774899	0.691856	-0.418612	-0.0480064	0.305058	0.678274	0.213846
BF	0.185713	0.121205	0.27255	0.0444252	0.347881	-0.0362949	-0.0584569	0.00270949	-0.0619483	-0.110311	-0.106606	-0.0656149	-0.409238	-0.303117	-0.341507	-0.353889	-0.246075	-0.257797	0.836685	0.846829	1	0.554638	0.291273	-0.512926	-0.536568	0.180753	0.34657	-0.139745	-0.047866	0.346415	0.815893	0.676948	-0.318317	0.0367109	0.354592	0.701019	0.171359
BL	0.422145	0.363173	0.492109	0.206971	0.778534	0.260125	0.235998	0.311791	0.23543	0.23345	0.231505	0.29091	-0.175494	0.0212276	-0.0575095	-0.0875182	0.0445142	0.0327997	0.657753	0.663161	0.554638	1	-0.240538	-0.283614	-0.41527	-0.346247	0.015809	-0.340212	-0.327245	-0.0625414	0.595075	0.618325	-0.492518	-0.272633	0.0899425	0.614427	0.462677
NSI	-0.312833	-0.353679	-0.284079	-0.366498	-0.296007	-0.414989	-0.407704	-0.373322	-0.418752	-0.420642	-0.405233	-0.369727	-0.450438	-0.435915	-0.418769	-0.459935	-0.426787	-0.441099	0.201047	0.196851	0.291273	-0.240538	1	-0.550949	-0.341007	0.941423	0.810742	0.398844	0.451931	0.550836	0.33967	0.0915391	0.285478	0.491139	0.443122	0.26007	-0.186255
AVSV	0.0472207	0.0739178	-0.0344031	0.255092	-0.181298	0.28095	0.291483	0.174244	0.299684	0.318901	0.310757	0.218401	0.475771	0.435569	0.448551	0.476464	0.422362	0.438148	-0.56912	-0.509808	-0.512926	-0.283614	-0.550949	1	0.968691	-0.349794	-0.794361	-0.0745788	-0.116688	-0.242319	-0.683574	-0.229621	0.136268	-0.123587	-0.219388	-0.527903	0.0352307
AASA	-0.0700442	-0.0443508	-0.155787	0.155604	-0.311109	0.175651	0.190847	0.0689264	0.197304	0.223043	0.218126	0.125663	0.404886	0.357161	0.3803	0.399467	0.345999	0.358067	-0.611096	-0.545283	-0.536568	-0.41527	-0.341007	0.968691	1	-0.135275	-0.673419	0.0561839	0.0251739	-0.101397	-0.697351	-0.259256	0.265028	0.0231322	-0.108789	-0.547854	-0.0222624
UI	-0.257966	-0.275507	-0.243969	-0.247116	-0.327011	-0.292508	-0.280335	-0.267693	-0.292255	-0.292786	-0.275684	-0.255703	-0.307689	-0.29065	-0.260894	-0.313348	-0.276881	-0.292296	0.0568273	0.0745759	0.180753	-0.346247	0.941423	-0.349794	-0.135275	1	0.605645	0.36661	0.405338	0.442377	0.213581	0.0636653	0.325138	0.448008	0.34869	0.184196	-0.132838
EI	-0.303028	-0.376792	-0.252636	-0.479113	-0.13269	-0.489535	-0.493476	-0.42197	-0.502242	-0.49528	-0.486183	-0.426497	-0.599367	-0.564481	-0.57906	-0.605796	-0.571601	-0.581457	0.368123	0.319162	0.34657	0.015809	0.810742	-0.794361	-0.673419	0.605645	1	0.347963	0.385897	0.504887	0.392997	0.0206973	0.125867	0.396826	0.402057	0.28555	-0.230854
MAA	-0.885044	-0.873731	-0.864958	-0.794991	-0.619483	-0.731068	-0.730058	-0.740562	-0.728496	-0.617707	-0.621828	-0.623966	-0.748015	-0.687473	-0.700764	-0.73332	-0.676005	-0.693355	-0.229709	-0.226901	-0.139745	-0.340212	0.398844	-0.0745788	0.0561839	0.36661	0.347963	1	0.986658	0.661626	-0.399602	-0.578867	0.939017	0.94898	0.652176	-0.457376	-0.487978
absMAA	-0.885991	-0.869557	-0.858231	-0.788664	-0.613154	-0.736271	-0.735363	-0.743655	-0.733974	-0.626866	-0.629988	-0.630079	-0.773151	-0.705012	-0.717635	-0.755983	-0.683232	-0.702745	-0.159421	-0.140488	-0.047866	-0.327245	0.451931	-0.116688	0.0251739	0.405338	0.385897	0.986658	1	0.765911	-0.306549	-0.480196	0.907468	0.979797	0.73776	-0.368816	-0.450199
MSD	-0.630831	-0.618647	-0.574147	-0.561791	-0.346031	-0.547493	-0.548811	-0.54215	-0.54938	-0.473712	-0.471992	-0.459365	-0.706835	-0.589908	-0.611817	-0.668578	-0.53769	-0.561569	0.197755	0.273494	0.346415	-0.0625414	0.550836	-0.242319	-0.101397	0.442377	0.504887	0.661626	0.765911	1	0.137742	0.071354	0.498145	0.834104	0.928116	0.122007	-0.12795
HMC	0.450578	0.435704	0.537819	0.301092	0.592079	0.23204	0.217956	0.311662	0.211308	0.151856	0.161195	0.233645	-0.107239	0.00635771	-0.0219479	-0.0554825	0.0504016	0.0353909	0.761705	0.774899	0.815893	0.595075	0.33967	-0.683574	-0.697351	0.213581	0.392997	-0.399602	-0.306549	0.137742	1	0.840358	-0.532658	-0.208716	0.175848	0.932957	0.446252
MLN	0.659425	0.66185	0.722175	0.596779	0.738189	0.567934	0.557589	0.603215	0.553374	0.510257	0.518252	0.555933	0.184144	0.367813	0.326751	0.278794	0.421611	0.406426	0.609996	0.691856	0.676948	0.618325	0.0915391	-0.229621	-0.259256	0.0636653	0.0206973	-0.578867	-0.480196	0.071354	0.840358	1	-0.614995	-0.336815	0.159349	0.922064	0.74447
GAA	-0.770651	-0.722213	-0.766549	-0.599108	-0.596084	-0.522268	-0.516721	-0.549661	-0.513788	-0.397923	-0.40308	-0.422867	-0.506529	-0.442996	-0.44688	-0.479348	-0.42818	-0.445297	-0.433912	-0.418612	-0.318317	-0.492518	0.285478	0.136268	0.265028	0.325138	0.125867	0.939017	0.907468	0.498145	-0.532658	-0.614995	1	0.878168	0.541279	-0.532776	-0.37396
absGAA	-0.803875	-0.781488	-0.766201	-0.698016	-0.519436	-0.634893	-0.635406	-0.642592	-0.634535	-0.522698	-0.525108	-0.52461	-0.755982	-0.635079	-0.659218	-0.7141	-0.602533	-0.624418	-0.095974	-0.0480064	0.0367109	-0.272633	0.491139	-0.123587	0.0231322	0.448008	0.396826	0.94898	0.979797	0.834104	-0.208716	-0.336815	0.878168	1	0.841802	-0.230448	-0.313232
GSD	-0.495708	-0.463237	-0.421626	-0.413695	-0.12491	-0.347445	-0.353958	-0.338976	-0.353657	-0.249121	-0.25009	-0.231963	-0.670036	-0.442783	-0.496693	-0.575383	-0.382558	-0.41152	0.205559	0.305058	0.354592	0.0899425	0.443122	-0.219388	-0.108789	0.34869	0.402057	0.652176	0.73776	0.928116	0.175848	0.159349	0.541279	0.841802	1	0.22707	0.0963236
HGC	0.562285	0.59174	0.655196	0.494725	0.727201	0.46513	0.454729	0.537639	0.448024	0.420475	0.429913	0.497377	0.0469949	0.250887	0.206727	0.144156	0.30258	0.281163	0.621064	0.678274	0.701019	0.614427	0.26007	-0.527903	-0.547854	0.184196	0.28555	-0.457376	-0.368816	0.122007	0.932957	0.922064	-0.532776	-0.230448	0.22707	1	0.707142
GLN	0.668276	0.778417	0.728564	0.783938	0.816167	0.846546	0.844771	0.87374	0.843161	0.881754	0.88512	0.915404	0.435972	0.732198	0.672665	0.59079	0.779434	0.75365	0.10214	0.213846	0.171359	0.462677	-0.186255	0.0352307	-0.0222624	-0.132838	-0.230854	-0.487978	-0.450199	-0.12795	0.446252	0.74447	-0.37396	-0.313232	0.0963236	0.707142	1

## Sheet: all regions combined, site 2
Pearson's r	H	L_max	H_max	D_max	H_b	A	A_CH	A_MBS	A_closed	V	V_CH	V_MBS	D_neck,min	D_neck,max	P_neck	D_neck,equiv	A_neck	A_neck,elliptical	AR	eAR	BF	BL	NSI	AVSV	AASA	UI	EI	MAA	absMAA	MSD	HMC	MLN	GAA	absGAA	GSD	HGC	GLN
H	1	0.952596	0.98703	0.888084	0.871144	0.875382	0.880117	0.898458	0.877026	0.73232	0.743091	0.812715	0.640999	0.713017	0.689662	0.683244	0.686807	0.697756	0.603271	0.703619	0.511987	0.371176	-0.422983	0.267306	0.166577	-0.335643	-0.44274	-0.743598	-0.758639	-0.528089	0.454167	0.698866	-0.546988	-0.609179	-0.368631	0.44562	0.418732
L_max	0.952596	1	0.976831	0.96156	0.800255	0.893467	0.906639	0.943686	0.902047	0.748231	0.762837	0.848982	0.726267	0.845326	0.824078	0.796368	0.810018	0.810325	0.416713	0.555638	0.433521	0.292102	-0.284961	0.128399	0.0263108	-0.218896	-0.322231	-0.751719	-0.764349	-0.522044	0.555598	0.70111	-0.546607	-0.619385	-0.398151	0.53478	0.425857
H_max	0.98703	0.976831	1	0.9087	0.85865	0.873391	0.880499	0.919902	0.876515	0.724781	0.737	0.830299	0.642034	0.741878	0.714902	0.699861	0.708674	0.715366	0.566884	0.683064	0.518792	0.369365	-0.349916	0.171563	0.0627799	-0.278413	-0.366592	-0.743234	-0.759642	-0.529722	0.5259	0.701543	-0.550438	-0.612312	-0.378141	0.496929	0.412402
D_max	0.888084	0.96156	0.9087	1	0.748675	0.898703	0.913467	0.909731	0.910438	0.773536	0.786454	0.818654	0.770791	0.892199	0.878523	0.8479	0.86379	0.858358	0.282279	0.42287	0.42713	0.25206	-0.306321	0.24166	0.153633	-0.225306	-0.371778	-0.738222	-0.74555	-0.497472	0.476365	0.685835	-0.519789	-0.60387	-0.374604	0.484214	0.458221
H_b	0.871144	0.800255	0.85865	0.748675	1	0.77254	0.770516	0.745563	0.7708	0.677736	0.680552	0.676596	0.462932	0.559157	0.527733	0.513958	0.55572	0.561794	0.644882	0.717385	0.563449	0.690235	-0.470485	0.286965	0.177599	-0.376536	-0.469067	-0.633899	-0.657215	-0.50131	0.34938	0.595395	-0.476177	-0.523605	-0.325721	0.343932	0.387721
A	0.875382	0.893467	0.873391	0.898703	0.77254	1	0.998705	0.964313	0.999095	0.96062	0.966488	0.956829	0.589638	0.761583	0.718348	0.666323	0.740618	0.750235	0.288846	0.451508	0.324475	0.204108	-0.296979	0.259948	0.187678	-0.249777	-0.312371	-0.522646	-0.541764	-0.449772	0.285392	0.500885	-0.314806	-0.403079	-0.290584	0.292698	0.346575
A_CH	0.880117	0.906639	0.880499	0.913467	0.770516	0.998705	1	0.968695	0.999834	0.950799	0.957923	0.952843	0.620413	0.790593	0.749838	0.698332	0.771766	0.780092	0.274673	0.438435	0.313228	0.199815	-0.290574	0.255049	0.183289	-0.238852	-0.312528	-0.539973	-0.558417	-0.45585	0.302266	0.516739	-0.327926	-0.417899	-0.29961	0.314077	0.360845
A_MBS	0.898458	0.943686	0.919902	0.909731	0.745563	0.964313	0.968695	1	0.965833	0.878826	0.890559	0.973623	0.602898	0.785283	0.741977	0.687727	0.751984	0.757539	0.300869	0.476077	0.325489	0.179484	-0.211811	0.122095	0.0461045	-0.185442	-0.221738	-0.548508	-0.567696	-0.457718	0.408704	0.541886	-0.341048	-0.428695	-0.312846	0.394824	0.356395
A_closed	0.877026	0.902047	0.876515	0.910438	0.7708	0.999095	0.999834	0.965833	1	0.954163	0.960655	0.951903	0.617873	0.786628	0.745633	0.695099	0.768531	0.777342	0.2732	0.436071	0.312088	0.200685	-0.297158	0.262378	0.190109	-0.247926	-0.316345	-0.536624	-0.555269	-0.456018	0.29174	0.509289	-0.324781	-0.415393	-0.298198	0.302694	0.356974
V	0.73232	0.748231	0.724781	0.773536	0.677736	0.96062	0.950799	0.878826	0.954163	1	0.999308	0.925607	0.454166	0.643139	0.589997	0.527095	0.623198	0.637872	0.180381	0.342764	0.226938	0.141989	-0.239052	0.240252	0.183231	-0.214687	-0.236762	-0.36043	-0.380472	-0.360342	0.15205	0.337264	-0.189718	-0.266576	-0.214364	0.155461	0.248381
V_CH	0.743091	0.762837	0.737	0.786454	0.680552	0.966488	0.957923	0.890559	0.960655	0.999308	1	0.933165	0.465043	0.658259	0.60571	0.540498	0.637487	0.650762	0.181716	0.346925	0.229341	0.140133	-0.230879	0.232036	0.176075	-0.202024	-0.234769	-0.370169	-0.389622	-0.362416	0.172645	0.356121	-0.196516	-0.273628	-0.218201	0.178968	0.260842
V_MBS	0.812715	0.848982	0.830299	0.818654	0.676596	0.956829	0.952843	0.973623	0.951903	0.925607	0.933165	1	0.474527	0.683769	0.62736	0.560298	0.64452	0.654864	0.231043	0.417483	0.257499	0.116894	-0.163702	0.109691	0.049577	-0.165919	-0.151937	-0.405667	-0.427044	-0.389049	0.297197	0.410465	-0.222331	-0.304738	-0.244509	0.278949	0.278092
D_neck,min	0.640999	0.726267	0.642034	0.770791	0.462932	0.589638	0.620413	0.602898	0.617873	0.454166	0.465043	0.474527	1	0.863489	0.911488	0.966948	0.891103	0.901399	0.0130851	0.0467335	0.0516986	0.0579723	-0.306189	0.309055	0.255487	-0.254234	-0.357117	-0.742612	-0.744299	-0.469096	0.24086	0.48249	-0.541017	-0.650704	-0.397648	0.292299	0.352663
D_neck,max	0.713017	0.845326	0.741878	0.892199	0.559157	0.761583	0.790593	0.785283	0.786628	0.643139	0.658259	0.683769	0.863489	1	0.985665	0.951832	0.970524	0.964264	-0.0372397	0.117597	0.038898	0.0842698	-0.193294	0.186866	0.122959	-0.136219	-0.26105	-0.668151	-0.677558	-0.474045	0.364683	0.517514	-0.459127	-0.561409	-0.37695	0.402076	0.403101
P_neck	0.689662	0.824078	0.714902	0.878523	0.527733	0.718348	0.749838	0.741977	0.745633	0.589997	0.60571	0.62736	0.911488	0.985665	1	0.97606	0.973265	0.960689	-0.0490413	0.0778768	0.038102	0.0686526	-0.198217	0.209097	0.154159	-0.130059	-0.282274	-0.693717	-0.700141	-0.475947	0.352227	0.525505	-0.47798	-0.58968	-0.399994	0.401786	0.401253
D_neck,equiv	0.683244	0.796368	0.699861	0.8479	0.513958	0.666323	0.698332	0.687727	0.695099	0.527095	0.540498	0.560298	0.966948	0.951832	0.97606	1	0.957541	0.953961	-0.0125737	0.0689265	0.0542541	0.0779668	-0.270454	0.272796	0.211293	-0.220341	-0.33307	-0.740495	-0.744901	-0.483415	0.305298	0.517407	-0.530009	-0.639099	-0.403719	0.353418	0.39024
A_neck	0.686807	0.810018	0.708674	0.86379	0.55572	0.740618	0.771766	0.751984	0.768531	0.623198	0.637487	0.64452	0.891103	0.970524	0.973265	0.957541	1	0.994523	-0.0290727	0.0970205	0.0492952	0.100017	-0.227013	0.234618	0.180083	-0.159326	-0.298576	-0.615337	-0.622306	-0.438201	0.315715	0.510869	-0.395202	-0.498803	-0.339636	0.378849	0.425897
A_neck,elliptical	0.697756	0.810325	0.715366	0.858358	0.561794	0.750235	0.780092	0.757539	0.777342	0.637872	0.650762	0.654864	0.901399	0.964264	0.960689	0.953961	0.994523	1	-0.0153999	0.109016	0.0475408	0.0986378	-0.24375	0.244265	0.186914	-0.180142	-0.302898	-0.615159	-0.623124	-0.442948	0.296915	0.496448	-0.39665	-0.499222	-0.336302	0.352772	0.409444
AR	0.603271	0.416713	0.566884	0.282279	0.644882	0.288846	0.274673	0.300869	0.2732	0.180381	0.181716	0.231043	0.0130851	-0.0372397	-0.0490413	-0.0125737	-0.0290727	-0.0153999	1	0.951598	0.796126	0.571024	-0.409046	0.13772	0.0404872	-0.315972	-0.392279	-0.473153	-0.468519	-0.197942	0.419846	0.58364	-0.469966	-0.392399	-0.12288	0.371821	0.257782
eAR	0.703619	0.555638	0.683064	0.42287	0.717385	0.451508	0.438435	0.476077	0.436071	0.342764	0.346925	0.417483	0.0467335	0.117597	0.0778768	0.0689265	0.0970205	0.109016	0.951598	1	0.778178	0.558169	-0.363168	0.0828035	-0.0219603	-0.264697	-0.353642	-0.49416	-0.491643	-0.235107	0.508385	0.635604	-0.469123	-0.396457	-0.149322	0.448263	0.291071
BF	0.511987	0.433521	0.518792	0.42713	0.563449	0.324475	0.313228	0.325489	0.312088	0.226938	0.229341	0.257499	0.0516986	0.038898	0.038102	0.0542541	0.0492952	0.0475408	0.796126	0.778178	1	0.54013	-0.297471	0.126863	0.045168	-0.197665	-0.343979	-0.457258	-0.43658	-0.113583	0.497854	0.647285	-0.427658	-0.359373	-0.0865076	0.451675	0.312773
BL	0.371176	0.292102	0.369365	0.25206	0.690235	0.204108	0.199815	0.179484	0.200685	0.141989	0.140133	0.116894	0.0579723	0.0842698	0.0686526	0.0779668	0.100017	0.0986378	0.571024	0.558169	0.54013	1	-0.44724	0.202702	0.0967859	-0.307942	-0.46722	-0.358955	-0.375183	-0.238484	0.267954	0.420636	-0.347091	-0.297457	-0.162983	0.245084	0.200079
NSI	-0.422983	-0.284961	-0.349916	-0.306321	-0.470485	-0.296979	-0.290574	-0.211811	-0.297158	-0.239052	-0.230879	-0.163702	-0.306189	-0.193294	-0.198217	-0.270454	-0.227013	-0.24375	-0.409046	-0.363168	-0.297471	-0.44724	1	-0.794286	-0.668598	0.90072	0.915933	0.426976	0.444728	0.410158	0.165195	-0.275785	0.350385	0.405916	0.213842	0.161809	-0.16612
AVSV	0.267306	0.128399	0.171563	0.24166	0.286965	0.259948	0.255049	0.122095	0.262378	0.240252	0.232036	0.109691	0.309055	0.186866	0.209097	0.272796	0.234618	0.244265	0.13772	0.0828035	0.126863	0.202702	-0.794286	1	0.973031	-0.684394	-0.800961	-0.265236	-0.271546	-0.259288	-0.456645	0.126515	-0.158871	-0.238507	-0.0753686	-0.332757	0.190465
AASA	0.166577	0.0263108	0.0627799	0.153633	0.177599	0.187678	0.183289	0.0461045	0.190109	0.183231	0.176075	0.049577	0.255487	0.122959	0.154159	0.211293	0.180083	0.186914	0.0404872	-0.0219603	0.045168	0.0967859	-0.668598	0.973031	1	-0.558992	-0.71339	-0.157436	-0.153418	-0.150063	-0.529031	0.0620891	-0.0524966	-0.130967	-0.0125536	-0.37194	0.165856
UI	-0.335643	-0.218896	-0.278413	-0.225306	-0.376536	-0.249777	-0.238852	-0.185442	-0.247926	-0.214687	-0.202024	-0.165919	-0.254234	-0.136219	-0.130059	-0.220341	-0.159326	-0.180142	-0.315972	-0.264697	-0.197665	-0.307942	0.90072	-0.684394	-0.558992	1	0.684017	0.359262	0.383952	0.432224	0.287684	-0.0711371	0.28937	0.396575	0.223159	0.336883	-0.0659241
EI	-0.44274	-0.322231	-0.366592	-0.371778	-0.469067	-0.312371	-0.312528	-0.221738	-0.316345	-0.236762	-0.234769	-0.151937	-0.357117	-0.26105	-0.282274	-0.33307	-0.298576	-0.302898	-0.392279	-0.353642	-0.343979	-0.46722	0.915933	-0.800961	-0.71339	0.684017	1	0.454475	0.449247	0.281908	0.0126898	-0.461335	0.361486	0.369157	0.160829	-0.0402624	-0.26641
MAA	-0.743598	-0.751719	-0.743234	-0.738222	-0.633899	-0.522646	-0.539973	-0.548508	-0.536624	-0.36043	-0.370169	-0.405667	-0.742612	-0.668151	-0.693717	-0.740495	-0.615337	-0.615159	-0.473153	-0.49416	-0.457258	-0.358955	0.426976	-0.265236	-0.157436	0.359262	0.454475	1	0.99101	0.494522	-0.46608	-0.691993	0.928464	0.942945	0.475778	-0.460684	-0.38406
absMAA	-0.758639	-0.764349	-0.759642	-0.74555	-0.657215	-0.541764	-0.558417	-0.567696	-0.555269	-0.380472	-0.389622	-0.427044	-0.744299	-0.677558	-0.700141	-0.744901	-0.622306	-0.623124	-0.468519	-0.491643	-0.43658	-0.375183	0.444728	-0.271546	-0.153418	0.383952	0.449247	0.99101	1	0.590031	-0.423913	-0.640986	0.914245	0.955691	0.525042	-0.407401	-0.34657
MSD	-0.528089	-0.522044	-0.529722	-0.497472	-0.50131	-0.449772	-0.45585	-0.457718	-0.456018	-0.360342	-0.362416	-0.389049	-0.469096	-0.474045	-0.475947	-0.483415	-0.438201	-0.442948	-0.197942	-0.235107	-0.113583	-0.238484	0.410158	-0.259288	-0.150063	0.432224	0.281908	0.494522	0.590031	1	0.0389486	-0.035925	0.362397	0.622297	0.687597	0.146787	0.0651752
HMC	0.454167	0.555598	0.5259	0.476365	0.34938	0.285392	0.302266	0.408704	0.29174	0.15205	0.172645	0.297197	0.24086	0.364683	0.352227	0.305298	0.315715	0.296915	0.419846	0.508385	0.497854	0.267954	0.165195	-0.456645	-0.529031	0.287684	0.0126898	-0.46608	-0.423913	0.0389486	1	0.785782	-0.465824	-0.329831	-0.0671258	0.932239	0.386477
MLN	0.698866	0.70111	0.701543	0.685835	0.595395	0.500885	0.516739	0.541886	0.509289	0.337264	0.356121	0.410465	0.48249	0.517514	0.525505	0.517407	0.510869	0.496448	0.58364	0.635604	0.647285	0.420636	-0.275785	0.126515	0.0620891	-0.0711371	-0.461335	-0.691993	-0.640986	-0.035925	0.785782	1	-0.612691	-0.494032	-0.0388498	0.851814	0.661993
GAA	-0.546988	-0.546607	-0.550438	-0.519789	-0.476177	-0.314806	-0.327926	-0.341048	-0.324781	-0.189718	-0.196516	-0.222331	-0.541017	-0.459127	-0.47798	-0.530009	-0.395202	-0.39665	-0.469966	-0.469123	-0.427658	-0.347091	0.350385	-0.158871	-0.0524966	0.28937	0.361486	0.928464	0.914245	0.362397	-0.465824	-0.612691	1	0.928265	0.380723	-0.45488	-0.329197
absGAA	-0.609179	-0.619385	-0.612312	-0.60387	-0.523605	-0.403079	-0.417899	-0.428695	-0.415393	-0.266576	-0.273628	-0.304738	-0.650704	-0.561409	-0.58968	-0.639099	-0.498803	-0.499222	-0.392399	-0.396457	-0.359373	-0.297457	0.405916	-0.238507	-0.130967	0.396575	0.369157	0.942945	0.955691	0.622297	-0.329831	-0.494032	0.928265	1	0.590949	-0.278053	-0.223808
GSD	-0.368631	-0.398151	-0.378141	-0.374604	-0.325721	-0.290584	-0.29961	-0.312846	-0.298198	-0.214364	-0.218201	-0.244509	-0.397648	-0.37695	-0.399994	-0.403719	-0.339636	-0.336302	-0.12288	-0.149322	-0.0865076	-0.162983	0.213842	-0.0753686	-0.0125536	0.223159	0.160829	0.475778	0.525042	0.687597	-0.0671258	-0.0388498	0.380723	0.590949	1	0.0731055	0.466818
HGC	0.44562	0.53478	0.496929	0.484214	0.343932	0.292698	0.314077	0.394824	0.302694	0.155461	0.178968	0.278949	0.292299	0.402076	0.401786	0.353418	0.378849	0.352772	0.371821	0.448263	0.451675	0.245084	0.161809	-0.332757	-0.37194	0.336883	-0.0402624	-0.460684	-0.407401	0.146787	0.932239	0.851814	-0.45488	-0.278053	0.0731055	1	0.573214
GLN	0.418732	0.425857	0.412402	0.458221	0.387721	0.346575	0.360845	0.356395	0.356974	0.248381	0.260842	0.278092	0.352663	0.403101	0.401253	0.39024	0.425897	0.409444	0.257782	0.291071	0.312773	0.200079	-0.16612	0.190465	0.165856	-0.0659241	-0.26641	-0.38406	-0.34657	0.0651752	0.386477	0.661993	-0.329197	-0.223808	0.466818	0.573214	1
